# Supplementary material for: Endo- and exohedral chloro-fulleride as η5 ligands: a DFT study on the first-row transition metal complexes
Source: Royal Society of Chemistry journal article supplement (doi:10.1039/d0cp05612j), 2021-01-01
Supplement: d0cp05612j1.pdf [file d0cp05612j1.pdf]

# Endo- and exohedral chloro-fulleride as $\eta^5$ ligands: A DFT study on the first-row transition metal complexes

Sebastian Anila<sup>ab</sup> and Cherumuttathu H. Suresh<sup>\*ab</sup>

<sup>a</sup>Chemical Sciences and Technology Division, CSIR– National Institute for Interdisciplinary Science and Technology, Thiruvananthapuram Kerala, 695 019, India.

<sup>b</sup>Academy of Scientific and Innovative Research (AcSIR), Ghaziabad 201002, India.

Tel: +91-471-2515472, E-mail: sureshch@niist.res.in, sureshch@gmail.com

## Supporting Information

### Table of Contents

| Sl. No. | Title                                                                                                                                                                                                                    | Page No. |
|---------|--------------------------------------------------------------------------------------------------------------------------------------------------------------------------------------------------------------------------|----------|
| 1.      | Crystal structural of the reference complex, $\text{Mn}(\text{CO})_3\text{Cp}$                                                                                                                                           | S2       |
| 2       | Quantum Theory of Atoms In Molecules (QTAIM) analysis of $\text{MnCO}_3$ complexes                                                                                                                                       | S2       |
| 3       | Different exohedral complexes of $\text{Mn}(\text{CO})_3(\eta^5\text{-Cl}^-\text{C}_{60})$                                                                                                                               | S3       |
| 4       | $\text{Cp}^-$ complexes of the transition metals known in literature are used in this study                                                                                                                              | S4       |
| 5       | Exceptional case of exohedral complexes of transition metals: Sc, Cu and Ti                                                                                                                                              | S4       |
| 6       | Comparison of binding affinity of chloro-fulleride ligands in gas phase and solvent phase.                                                                                                                               | S5       |
| 7       | Comparison of binding affinity of chloro-fulleride ligands in $\eta^6$ and $\eta^5$ modes of coordination for Cr, Fe and Co complexes.                                                                                   | S6       |
| 8       | Cartesian coordinates of optimized geometry of ligands $\text{Cp}^-$ , $\text{C}_{60}$ , $\text{Cl}^-@C_{60}$ , $\text{Cl}^-\text{C}_{60}$ at M06L/6-31G(d,p) level. Atomic number followed by X, Y, Z coordinates in Å. | S7       |
| 9       | Cartesian coordinates of optimized geometry of $\text{CpML}_n$ complexes at M06L/6-31G(d,p) level. Atomic number followed by X, Y, Z coordinates in Å.                                                                   | S9       |
| 10      | Cartesian coordinates of optimized geometry of $(\text{C}_{60})\text{ML}_n$ complexes at M06L/6-31G(d,p) level. Atomic number followed by X, Y, Z coordinates in Å.                                                      | S13      |
| 11      | Cartesian coordinates of optimized geometry of $(\text{Cl}^-@C_{60})\text{ML}_n$ complexes at M06L/6-31G(d,p) level. Atomic number followed by X, Y, Z coordinates in Å.                                                 | S27      |
| 12      | Cartesian coordinates of optimized geometry of $(\text{Cl}^-\text{C}_{60})\text{ML}_n$ complexes at M06L/6-31G(d,p) level. Atomic number followed by X, Y, Z coordinates in Å.                                           | S40      |
| 13      | References                                                                                                                                                                                                               | S56      |

## 1. Crystal structural of the reference complex, Mn(CO)<sub>3</sub>Cp

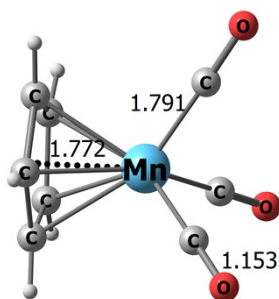

Fig. S1 Crystal structural of Mn(CO)<sub>3</sub>Cp<sup>1,2</sup>

## 2. Quantum Theory of Atoms In Molecules (QTAIM) analysis

The distance of interaction is labelled as  $d_1$  for the metal Mn from the C atoms of the five membered ring,  $d_2$  for Mn-CO distance,  $d_3$  for C-O distance,  $d_4$  for C-Cl distance and  $d_5$  for C-C distance in C<sub>60</sub>. QTAIM data analysis shows that the C-Cl interaction in the endohedral complex, Mn(CO)<sub>3</sub>( $\eta^5$ -Cl@C<sub>60</sub>) is purely non-covalent in nature, with avg. G/V value greater than one.<sup>3</sup> In the case of the exohedral complex the  $\rho$  value for C-Cl bond critical point clearly indicates the covalent bonding. This is again supported by the parameters like the negative values of  $\nabla^2\rho$  (-0.1068 a.u.) and H (-0.1384a.u.).

Table S1. QTAIM data of Mn(CO)<sub>3</sub> complexes. All values are given in a.u.

| Complex                                              | Parameter | avg. $\rho$ | avg. $\nabla^2\rho$ | V       | G      | avg. value of $ G/V $ | avg. value of H |
|------------------------------------------------------|-----------|-------------|---------------------|---------|--------|-----------------------|-----------------|
| Mn(CO) <sub>3</sub> ( $\eta^5$ -C <sub>60</sub> )    | $d_1$     | 0.0578      | 0.1844              | -0.0705 | 0.0583 | 0.8270                | -0.0122         |
|                                                      | $d_2$     | 0.0193      | 0.0615              | -0.0235 | 0.0194 | 0.2757                | -0.0041         |
|                                                      | $d_3$     | 0.4471      | 1.1129              | -1.7511 | 1.0147 | 0.5794                | -0.7364         |
|                                                      | $d_4$     | -           | -                   | -       | -      | -                     | -               |
|                                                      | $d_5$     | 0.2920      | -0.7484             | -0.3685 | 0.0907 | 0.2459                | -0.2778         |
| Mn(CO) <sub>3</sub> ( $\eta^5$ -Cl@C <sub>60</sub> ) | $d_1$     | 0.0581      | 0.1922              | -0.0714 | 0.0597 | 0.8367                | -0.0117         |
|                                                      | $d_2$     | 0.1478      | 0.6173              | -0.2520 | 0.2031 | 0.8062                | -0.0488         |
|                                                      | $d_3$     | 0.4422      | 1.0622              | -1.7182 | 0.9919 | 0.5773                | -0.7263         |
|                                                      | $d_4$     | 0.2930      | -0.7555             | -0.3704 | 0.0908 | 0.2582                | -0.2797         |
|                                                      | $d_5$     | 0.0069      | 0.0226              | -0.0040 | 0.0048 | 1.2139                | 0.0008          |
| Mn(CO) <sub>3</sub> ( $\eta^5$ -Cl-C <sub>60</sub> ) | $d_1$     | 0.0608      | 0.2063              | -0.0764 | 0.0640 | 0.8394                | -0.0124         |
|                                                      | $d_2$     | 0.1463      | 0.6167              | -0.2495 | 0.2018 | 0.8091                | -0.0476         |

|       |        |         |         |        |        |         |
|-------|--------|---------|---------|--------|--------|---------|
| $d_3$ | 0.4423 | 1.0609  | -1.7184 | 0.9918 | 0.5772 | -0.7266 |
| $d_4$ | 0.2908 | -0.7419 | -0.3663 | 0.0904 | 0.2464 | -0.2759 |
| $d_5$ | 0.1513 | -0.1068 | -0.1384 | 0.0559 | 0.4036 | -0.0826 |

### 3. Different exohedral complexes of $\text{Mn}(\text{CO})_3(\eta^5\text{-Cl-C}_{60})$

Variations in exohedral complex,  $\text{Mn}(\text{CO})_3(\eta^5\text{-Cl-C}_{60})$  by changing the position of exohedral bonding of  $\text{Cl}^-$  with respect to the five membered ring attached to the metal fragment  $[\text{Mn}(\text{CO})_3]^+$ . When  $\text{Cl}^-$  is connected at  $\alpha, \beta, \gamma, \delta, \epsilon, \zeta,$  and  $\eta$  positions the complexes are represented as A, B, C, D, E, F, and G respectively. Relative energies (kcal/mol) of each complex with respect to complex A with  $\text{Cl}^-$  at the  $\alpha$ -position is given in Table S3, which shows that A is the most stable form among the various possible exohedral complexes of  $\text{Mn}(\text{CO})_3(\eta^5\text{-Cl-C}_{60})$ .

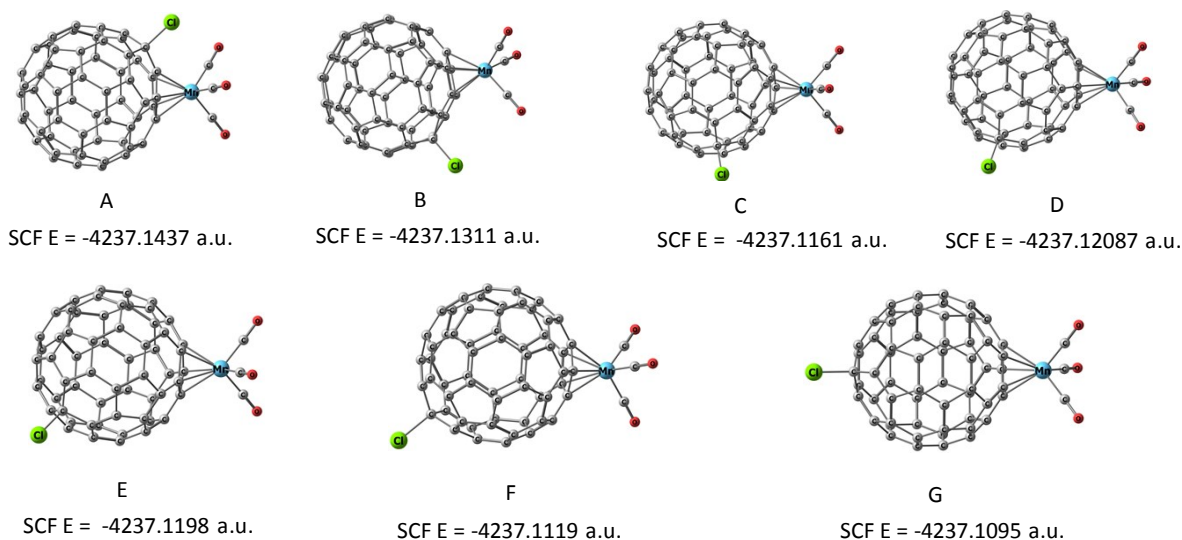

**Fig. S2** The variations in exohedral bonding of  $\text{Cl}^-$  to  $\text{C}_{60}$  unit in  $\text{Mn}(\text{CO})_3(\eta^5\text{-Cl-C}_{60})$  with their respective SCF energies in a.u.

**Table S2. Relative energies in kcal/mol of the different exohedral complexes with respect to the most stable form A.**

| Complex | Relative energy (kcal/mol) |
|---------|----------------------------|
| A       | 0                          |
| B       | 7.931977                   |
| C       | 17.35593                   |
| D       | 14.33415                   |
| E       | 15.01056                   |
| F       | 19.95949                   |
| G       | 21.46282                   |

#### 4. Cp<sup>-</sup> complexes of the transition metals known in literature used in this study.

ful<sub>2</sub>ScCO<sub>4</sub> (CAS Registry Number 209116-85-8)<sup>4</sup>  
 CpTiCl<sub>3</sub> (CAS Registry Number 1270-98-0)<sup>5,6</sup>  
 CpTiCO<sub>2</sub>Cl (CAS Registry Number 110141-99-6)<sup>7</sup>  
 CpVCO<sub>2</sub> (CAS Registry Number 120610-59-5)<sup>8</sup>  
 CpVCO<sub>3</sub> (CAS Registry Number 120610-58-4)<sup>9</sup>  
 CpVCO<sub>4</sub> (CAS Registry Number 12108-04-2)<sup>10,11</sup>  
 CpCrCO<sub>2</sub>Cl<sup>12</sup>, CpCrCO<sub>2</sub>H (CAS Registry Number 1384841-85-3)<sup>13</sup> CpCrCO<sub>2</sub>Cl  
 CpMnNMe<sub>3</sub>CO<sub>2</sub><sup>14</sup>, CpMnPMe<sub>3</sub>CO<sub>2</sub><sup>15</sup>  
 CpFeCO<sub>2</sub>Cl, CpFeCO<sub>2</sub>Br<sup>16</sup>  
 CpCoCOPEt<sub>3</sub><sup>17,18</sup>  
 CpCoCONMe<sub>3</sub><sup>19</sup>  
 CpNiPMe<sub>3</sub>Cl (CAS Registry Number 85191-97-5)<sup>20</sup>  
 CpNiNEt<sub>3</sub>Cl (CAS Registry Number 125026-88-2)<sup>20</sup>  
 CpCuPEt<sub>3</sub> (CAS Registry Number 12261-30-2)<sup>21,22</sup>  
 CpCuNMe<sub>3</sub> (CAS Registry Number 89989-39-9)<sup>23</sup>  
 CpCuCO (CAS Registry Number 31922-31-3)<sup>24</sup>

#### 5. Exceptional case of exohedral complexes of transition metals: Sc, Cu and Ti

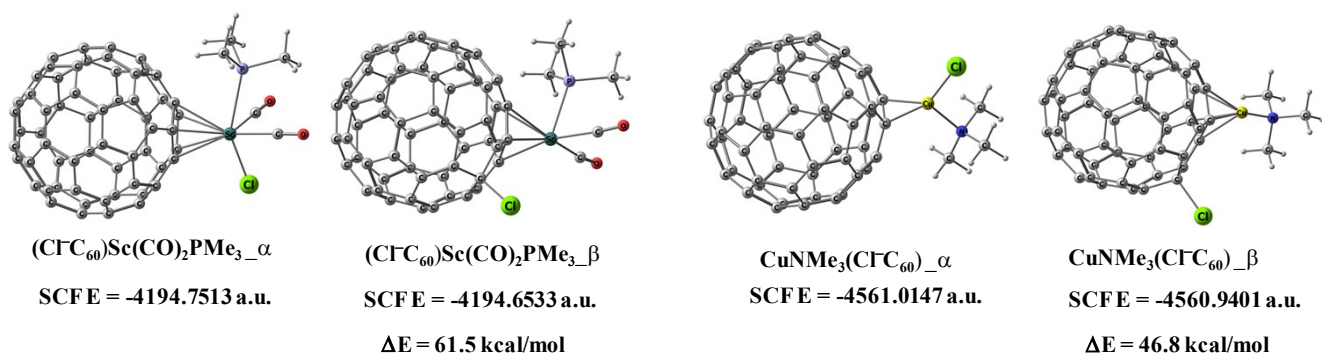

**Fig. S3** Optimised geometries and SCF energy (a.u.) of [(Cl<sup>-</sup>C<sub>60</sub>)Sc(CO)<sub>2</sub>PMe<sub>3</sub>] and [(Cl<sup>-</sup>C<sub>60</sub>)CuNMe<sub>3</sub>] with Cl<sup>-</sup> at α and β positions. The difference in their SCF energies are given in kcal/mol.

In both the cases the α form is found to be more stabilized than corresponding β form with an energy difference of 61.5 kcal/mol for [(Cl<sup>-</sup>C<sub>60</sub>)Sc(CO)<sub>2</sub>PMe<sub>3</sub>] and 46.8 kcal/mol for [(Cl<sup>-</sup>C<sub>60</sub>)CuNMe<sub>3</sub>]. In the case of Sc, α form has the metal coordinated to Cl<sup>-</sup> also as another ligand. Here fullerene is not in the anionic form, but the negative charge resides in Cl<sup>-</sup> itself. Whereas in the β form the exohedral anionic nature of the fullerene unit is reserved in the complexation and Cl<sup>-</sup>C<sub>60</sub> acts as the large anionic ligand. Similar is the observation with the Cu complex as well. In the case of TiCl<sub>3</sub>, the non-bonded C<sub>60</sub>...TiCl<sub>4</sub> is formed when the optimization is attempted for (Cl<sup>-</sup>C<sub>60</sub>)(TiCl<sub>3</sub>)<sup>+</sup> with Cl<sup>-</sup> at the α-position. Also, the optimization of the complex with Cl<sup>-</sup> at the β-position yields the structure given in Fig. 5 wherein the fullerene part shows η<sup>1</sup> coordination with Ti. When the Cl<sup>-</sup> is connected diametrically opposite to the metal coordination, η<sup>5</sup> complex of [(Cl<sup>-</sup>C<sub>60</sub>)(TiCl<sub>3</sub>)<sup>+</sup>] is obtained.

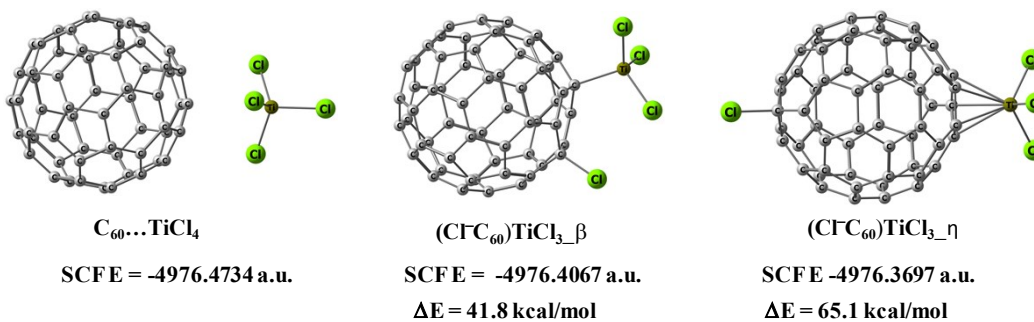

**Fig. S4** Optimised geometries and SCF energy (a.u.) of  $[(Cl^-C_{60})TiCl_3]$  with  $Cl^-$  at  $\alpha$ ,  $\beta$  and diametrically opposite to metal coordination ( $\eta$ ) position. The difference in their SCF energies are given in kcal/mol.

## 6. Comparison of binding affinity of chloro-fulleride ligands in gas phase and solvent phase.

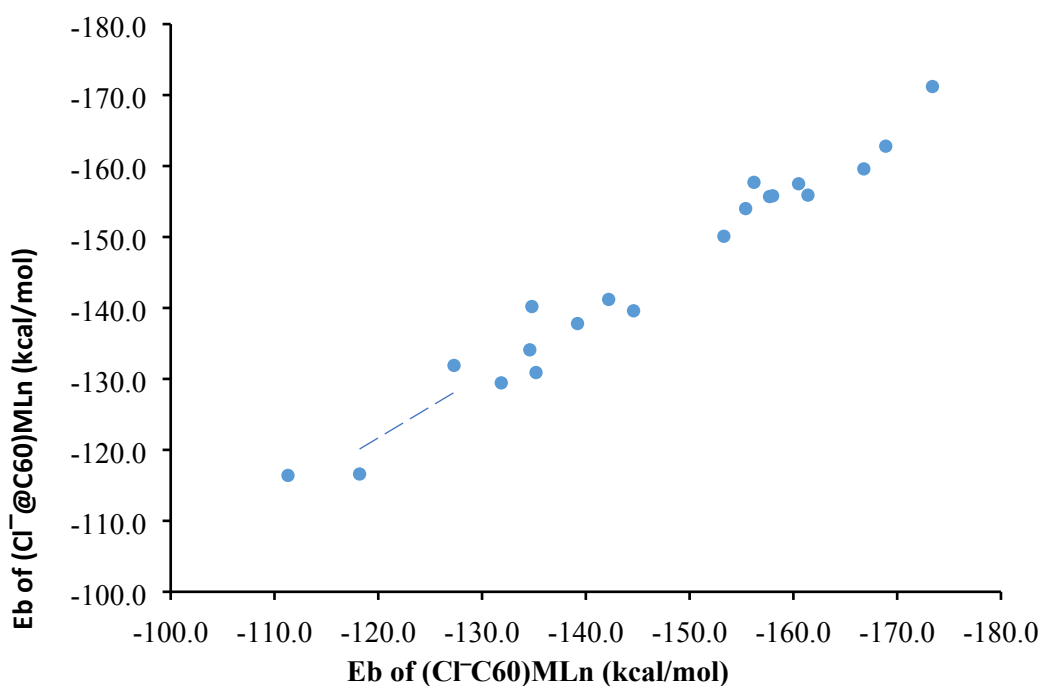

**Fig. S5** Correlation between the  $E_b$  (kcal/mol) of  $(Cl^-C_{60})ML_n$  against  $(Cl^-@C_{60})ML_n$ .

The  $E_b$  values of  $(Cl^-C_{60})(ML_n)^+$  is having a good linear correlation (Fig.S5) with  $(Cl^-@C_{60})(ML_n)^+$  with the correlation coefficient (R) of 0.9826. The correlation for the same complexes in gaseous state was having  $R = 0.9834$ . This similar values of R show that the trend in the complexation of the  $(Cl^-@C_{60})(ML_n)^+$  and  $(Cl^-C_{60})(ML_n)^+$  in gaseous state is conserved even under the influence of the solvent as well. This may be because in the ligands  $Cl^-@C_{60}$  and  $Cl^-C_{60}$ , the negative charge is no longer on Cl atom alone but  $Cl^-@C_{60}$  and  $Cl^-C_{60}$  are acting as the large anions with the extra electron delocalized over the whole fullerene unit.

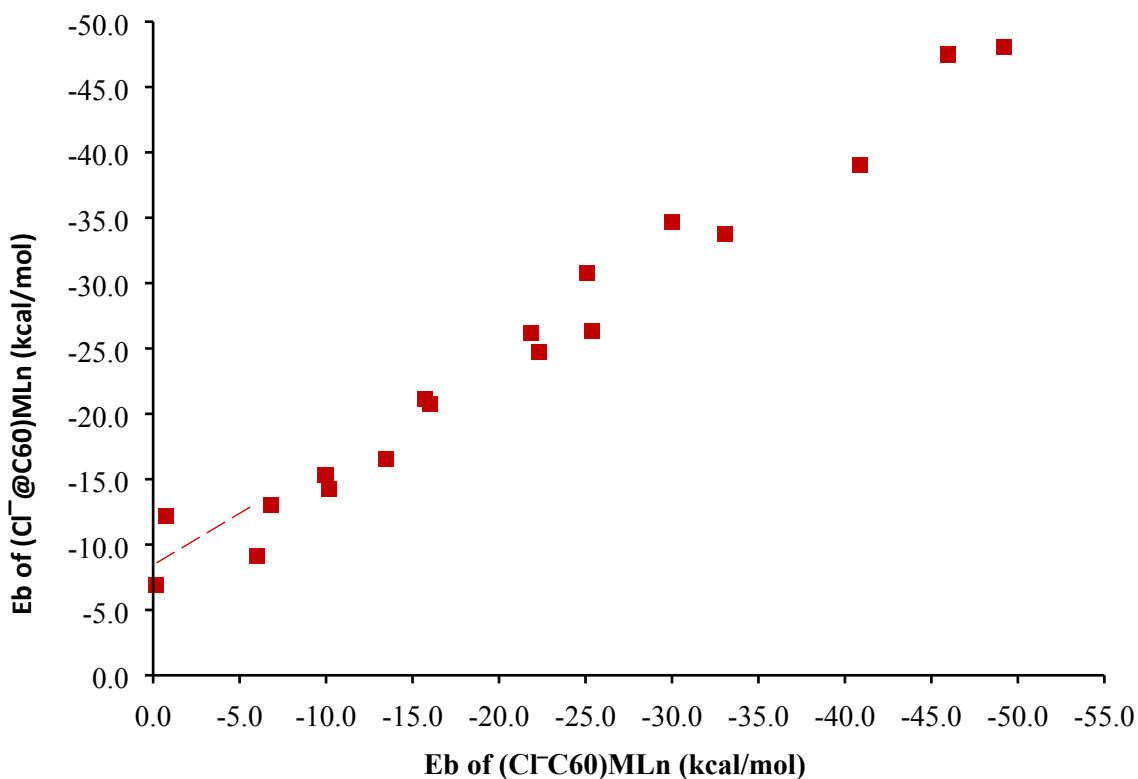

Fig. S6 Correlation between the  $E_{bs}$  (kcal/mol) of  $(Cl^-@C_{60})ML_n$  against  $(Cl^-@C_{60})ML_n$ .

7. Comparison of binding affinity of chloro-fulleride ligands in  $\eta^6$  and  $\eta^5$  modes of coordination for Cr, Fe and Co complexes.

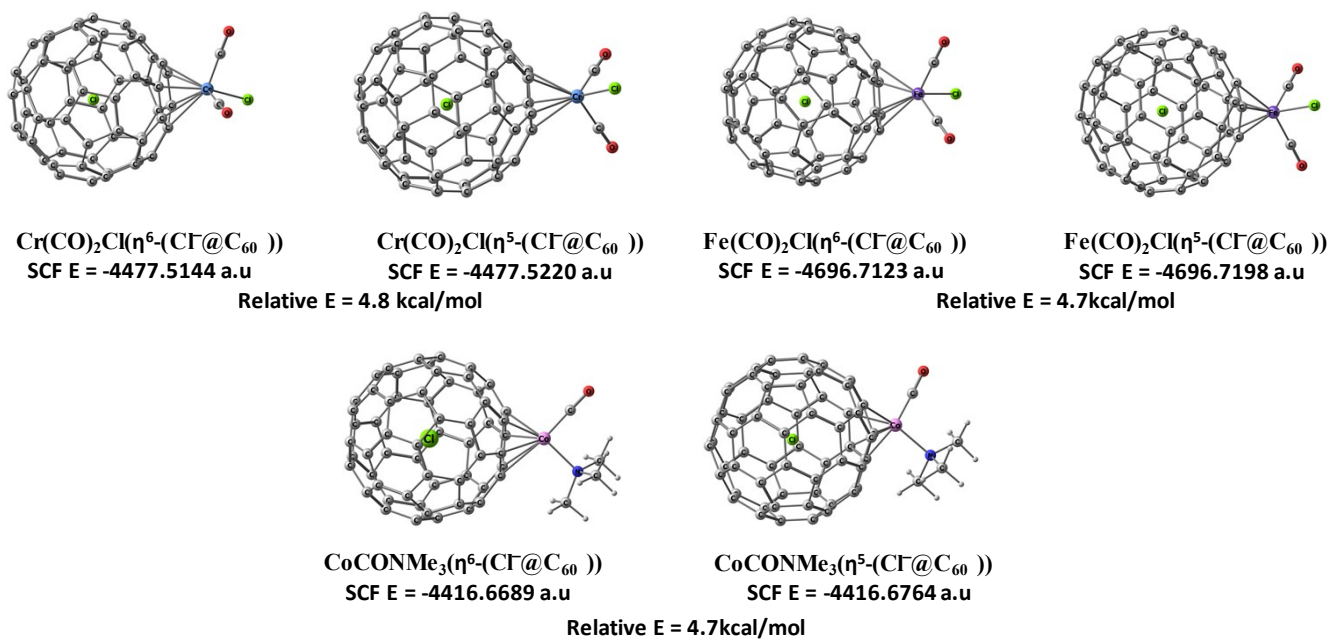

Fig. S7 Optimised geometries and SCF energy (a.u.) of  $(Cl^-@C_{60})$  complexes of Cr, Fe, and Co in  $\eta^6$  and  $\eta^5$  modes of coordination.

8. Cartesian coordinates of optimized geometry of ligands Cp<sup>-</sup>, C<sub>60</sub>, Cl<sup>-</sup>@C<sub>60</sub>, Cl<sup>-</sup>C<sub>60</sub> at Mo6L/6-31G(d,p) level. Atomic number followed by X, Y, Z coordinates in Å.

| Cp <sup>-</sup> |              |              |              | C <sub>60</sub> |              |              |              |
|-----------------|--------------|--------------|--------------|-----------------|--------------|--------------|--------------|
| 6               | 0.686595000  | -0.983427000 | -0.000170000 | 6               | -1.694235000 | 2.876716000  | 1.169945000  |
| 6               | 1.147387000  | 0.349077000  | 0.000089000  | 6               | -1.015488000 | 3.388762000  | 0.000000000  |
| 6               | 0.022582000  | 1.199169000  | 0.000045000  | 6               | -0.960156000 | 2.512413000  | 2.298722000  |
| 6               | -1.133417000 | 0.392025000  | 0.000026000  | 6               | 0.373217000  | 3.517998000  | 0.000000000  |
| 6               | -0.723145000 | -0.956858000 | -0.000073000 | 6               | 1.134317000  | 3.139925000  | -1.170085000 |
| 1               | -1.380692000 | -1.826278000 | 0.000509000  | 6               | -1.694235000 | 2.876716000  | -1.169945000 |
| 1               | -2.163722000 | 0.748146000  | -0.000148000 | 6               | -0.960156000 | 2.512413000  | -2.298722000 |
| 1               | 0.043099000  | 2.289025000  | -0.000137000 | 6               | 0.479726000  | 2.646349000  | -2.298675000 |
| 1               | 2.190361000  | 0.666175000  | -0.000045000 | 6               | -2.355773000 | 0.506869000  | 2.590892000  |
| 1               | 1.310945000  | -1.876986000 | 0.000324000  | 6               | -3.116859000 | 0.884873000  | 1.420643000  |
|                 |              |              |              | 6               | -1.296790000 | 1.305962000  | 3.021957000  |
|                 |              |              |              | 6               | -2.791989000 | 2.048222000  | 0.723095000  |
|                 |              |              |              | 6               | -2.791989000 | 2.048222000  | -0.723095000 |
|                 |              |              |              | 6               | -3.453682000 | -0.321387000 | 0.697505000  |
|                 |              |              |              | 6               | -3.453682000 | -0.321387000 | -0.697505000 |
|                 |              |              |              | 6               | -3.116859000 | 0.884873000  | -1.420643000 |
|                 |              |              |              | 6               | 0.064754000  | -0.694450000 | 3.468855000  |
|                 |              |              |              | 6               | -1.033200000 | -1.522858000 | 3.021722000  |
|                 |              |              |              | 6               | -0.064754000 | 0.694450000  | 3.468855000  |
|                 |              |              |              | 6               | -2.221456000 | -0.932987000 | 2.590584000  |
|                 |              |              |              | 6               | -2.900087000 | -1.444751000 | 1.420397000  |
|                 |              |              |              | 6               | -0.479726000 | -2.646349000 | 2.298675000  |
|                 |              |              |              | 6               | -1.134317000 | -3.139925000 | 1.170085000  |
|                 |              |              |              | 6               | -2.366154000 | -2.528337000 | 0.723070000  |
|                 |              |              |              | 6               | 2.221456000  | 0.932987000  | 2.590584000  |
|                 |              |              |              | 6               | 2.355773000  | -0.506869000 | 2.590892000  |
|                 |              |              |              | 6               | 1.033200000  | 1.522858000  | 3.021722000  |
|                 |              |              |              | 6               | 1.296790000  | -1.305962000 | 3.021957000  |
|                 |              |              |              | 6               | 0.960156000  | -2.512413000 | 2.298722000  |
|                 |              |              |              | 6               | 3.116859000  | -0.884873000 | 1.420643000  |
|                 |              |              |              | 6               | 2.791989000  | -2.048222000 | 0.723095000  |
|                 |              |              |              | 6               | 1.694235000  | -2.876716000 | 1.169945000  |
|                 |              |              |              | 6               | 1.134317000  | 3.139925000  | 1.170085000  |
|                 |              |              |              | 6               | 2.366154000  | 2.528337000  | 0.723070000  |
|                 |              |              |              | 6               | 0.479726000  | 2.646349000  | 2.298675000  |
|                 |              |              |              | 6               | 2.900087000  | 1.444751000  | 1.420397000  |
|                 |              |              |              | 6               | 3.453682000  | 0.321387000  | 0.697505000  |
|                 |              |              |              | 6               | 2.366154000  | 2.528337000  | -0.723070000 |
|                 |              |              |              | 6               | 2.900087000  | 1.444751000  | -1.420397000 |
|                 |              |              |              | 6               | 3.453682000  | 0.321387000  | -0.697505000 |
|                 |              |              |              | 6               | 1.694235000  | -2.876716000 | -1.169945000 |
|                 |              |              |              | 6               | 2.791989000  | -2.048222000 | -0.723095000 |
|                 |              |              |              | 6               | 3.116859000  | -0.884873000 | -1.420643000 |
|                 |              |              |              | 6               | 0.960156000  | -2.512413000 | -2.298722000 |
|                 |              |              |              | 6               | -1.134317000 | -3.139925000 | -1.170085000 |
|                 |              |              |              | 6               | -0.373217000 | -3.517998000 | 0.000000000  |
|                 |              |              |              | 6               | 1.015488000  | -3.388762000 | 0.000000000  |
|                 |              |              |              | 6               | -0.479726000 | -2.646349000 | -2.298675000 |
|                 |              |              |              | 6               | -2.221456000 | -0.932987000 | -2.590584000 |
|                 |              |              |              | 6               | -2.900087000 | -1.444751000 | -1.420397000 |
|                 |              |              |              | 6               | -2.366154000 | -2.528337000 | -0.723070000 |
|                 |              |              |              | 6               | -1.033200000 | -1.522858000 | -3.021722000 |
|                 |              |              |              | 6               | -0.064754000 | 0.694450000  | -3.468855000 |
|                 |              |              |              | 6               | -1.296790000 | 1.305962000  | -3.021957000 |
|                 |              |              |              | 6               | -2.355773000 | 0.506869000  | -2.590892000 |
|                 |              |              |              | 6               | 0.064754000  | -0.694450000 | -3.468855000 |
|                 |              |              |              | 6               | 2.355773000  | -0.506869000 | -2.590892000 |
|                 |              |              |              | 6               | 2.221456000  | 0.932987000  | -2.590584000 |
|                 |              |              |              | 6               | 1.033200000  | 1.522858000  | -3.021722000 |

|                                  |                                 |              |              |              |              |              |              |
|----------------------------------|---------------------------------|--------------|--------------|--------------|--------------|--------------|--------------|
|                                  | 6                               | 1.296790000  | -1.305962000 | -3.021957000 |              |              |              |
| Cl <sup>-</sup> @C <sub>60</sub> | Cl <sup>-</sup> C <sub>60</sub> |              |              |              |              |              |              |
| 6                                | -0.194924000                    | 3.374580000  | 1.039093000  | 6            | -1.563033000 | -2.644659000 | 1.462766000  |
| 6                                | -1.590454000                    | 3.006658000  | 0.967021000  | 6            | -2.334694000 | -2.376697000 | 0.268142000  |
| 6                                | 0.557331000                     | 3.489766000  | -0.129761000 | 6            | -1.542514000 | -1.715026000 | 2.504507000  |
| 6                                | -2.185378000                    | 2.766747000  | -0.271386000 | 6            | -3.049518000 | -1.186131000 | 0.155015000  |
| 6                                | -3.094585000                    | 1.655183000  | -0.433006000 | 6            | -3.052970000 | -0.458249000 | -1.094452000 |
| 6                                | -1.883236000                    | 2.143522000  | 2.088222000  | 6            | -1.587311000 | -2.880643000 | -0.864703000 |
| 6                                | -2.761055000                    | 1.070891000  | 1.932407000  | 6            | -1.590638000 | -2.177504000 | -2.071107000 |
| 6                                | -3.377485000                    | 0.822236000  | 0.649409000  | 6            | -2.341422000 | -0.945431000 | -2.188584000 |
| 6                                | 2.456156000                     | 2.359492000  | 0.950655000  | 6            | 0.876917000  | -2.072377000 | 2.808223000  |
| 6                                | 1.676787000                     | 2.240061000  | 2.161448000  | 6            | 0.855602000  | -3.034240000 | 1.731284000  |
| 6                                | 1.906228000                     | 2.973009000  | -0.174755000 | 6            | -0.302465000 | -1.422092000 | 3.183732000  |
| 6                                | 0.374875000                     | 2.738476000  | 2.204788000  | 6            | -0.343779000 | -3.311369000 | 1.068725000  |
| 6                                | -0.668557000                    | 1.977778000  | 2.853029000  | 6            | -0.358981000 | -3.457159000 | -0.370867000 |
| 6                                | 1.982218000                     | 0.963174000  | 2.764853000  | 6            | 2.079831000  | -2.886675000 | 0.974668000  |
| 6                                | 0.974917000                     | 0.228999000  | 3.390551000  | 6            | 2.065166000  | -3.027253000 | -0.414376000 |
| 6                                | -0.373821000                    | 0.745260000  | 3.435364000  | 6            | 0.826105000  | -3.321135000 | -1.100511000 |
| 6                                | 2.883198000                     | 1.244055000  | -1.625530000 | 6            | 0.914024000  | 0.708987000  | 3.409930000  |
| 6                                | 3.453022000                     | 0.608542000  | -0.459846000 | 6            | 2.132279000  | 0.036587000  | 3.014740000  |
| 6                                | 2.123503000                     | 2.405402000  | -1.485608000 | 6            | -0.283201000 | -0.007934000 | 3.489901000  |
| 6                                | 3.243317000                     | 1.156388000  | 0.805656000  | 6            | 2.113741000  | -1.327900000 | 2.719177000  |
| 6                                | 2.950555000                     | 0.293389000  | 1.927111000  | 6            | 2.858175000  | -1.832074000 | 1.586022000  |
| 6                                | 3.377552000                     | -0.822089000 | -0.649341000 | 6            | 2.895275000  | 0.944939000  | 2.187394000  |
| 6                                | 3.094603000                     | -1.654921000 | 0.433121000  | 6            | 3.614934000  | 0.458002000  | 1.094202000  |
| 6                                | 2.877320000                     | -1.087418000 | 1.743938000  | 6            | 3.596359000  | -0.955145000 | 0.788334000  |
| 6                                | 0.496292000                     | 1.569277000  | -3.128891000 | 6            | -1.502587000 | 1.849845000  | 2.436425000  |
| 6                                | 1.283033000                     | 0.366092000  | -3.273710000 | 6            | -0.264578000 | 2.588128000  | 2.346291000  |
| 6                                | 0.908996000                     | 2.571040000  | -2.250640000 | 6            | -1.511782000 | 0.571844000  | 2.999095000  |
| 6                                | 2.455522000                     | 0.206216000  | -2.535470000 | 6            | 0.923591000  | 2.030699000  | 2.827684000  |
| 6                                | 2.761142000                     | -1.070787000 | -1.932348000 | 6            | 2.147584000  | 2.177667000  | 2.071212000  |
| 6                                | 0.373880000                     | -0.745137000 | -3.435320000 | 6            | -0.268120000 | 3.316715000  | 1.096099000  |
| 6                                | 0.668601000                     | -1.977693000 | -2.853017000 | 6            | 0.916838000  | 3.463514000  | 0.368843000  |
| 6                                | 1.883265000                     | -2.143395000 | -2.088164000 | 6            | 2.144193000  | 2.880611000  | 0.864792000  |
| 6                                | -1.406128000                    | 2.886090000  | -1.482290000 | 6            | -3.027413000 | -0.222613000 | 1.233054000  |
| 6                                | -1.833641000                    | 1.848137000  | -2.392123000 | 6            | -3.017490000 | 1.100326000  | 0.650006000  |
| 6                                | -0.059044000                    | 3.241136000  | -1.412786000 | 6            | -2.292636000 | -0.482342000 | 2.387974000  |
| 6                                | -0.899239000                    | 1.201481000  | -3.200718000 | 6            | -2.273676000 | 2.119348000  | 1.241552000  |
| 6                                | -0.974860000                    | -0.228882000 | -3.390400000 | 6            | -1.508226000 | 3.027923000  | 0.414616000  |
| 6                                | -2.877260000                    | 1.087548000  | -1.743783000 | 6            | -3.033167000 | 0.954877000  | -0.788328000 |
| 6                                | -2.950438000                    | -0.293263000 | -1.926951000 | 6            | -2.303704000 | 1.833168000  | -1.586870000 |
| 6                                | -1.982152000                    | -0.963067000 | -2.764710000 | 6            | -1.522692000 | 2.886520000  | -0.974511000 |
| 6                                | 0.194855000                     | -3.374378000 | -1.039010000 | 6            | 2.120135000  | 2.645262000  | -1.462953000 |
| 6                                | -0.374862000                    | -2.738448000 | -2.204806000 | 6            | 0.901742000  | 3.317912000  | -1.068019000 |
| 6                                | -1.676788000                    | -2.240044000 | -2.161408000 | 6            | -0.297574000 | 3.030567000  | -1.726057000 |
| 6                                | -0.557410000                    | -3.489684000 | 0.129840000  | 6            | 2.099292000  | 1.714799000  | -2.503783000 |
| 6                                | 1.406146000                     | -2.885922000 | 1.482371000  | 6            | 3.590884000  | 0.222525000  | -1.233398000 |
| 6                                | 2.185296000                     | -2.766386000 | 0.271464000  | 6            | 3.611577000  | 1.185816000  | -0.155079000 |
| 6                                | 1.590366000                     | -3.006373000 | -0.966916000 | 6            | 2.888620000  | 2.375417000  | -0.267917000 |
| 6                                | 0.059054000                     | -3.240962000 | 1.412830000  | 6            | 2.847197000  | 0.482132000  | -2.386490000 |
| 6                                | -0.496249000                    | -1.569176000 | 3.129004000  | 6            | 2.059577000  | -1.849424000 | -2.436017000 |
| 6                                | 0.899282000                     | -1.201387000 | 3.200882000  | 6            | 2.828574000  | -2.118017000 | -1.240737000 |
| 6                                | 1.833695000                     | -1.848043000 | 2.392282000  | 6            | 3.581409000  | -1.100785000 | -0.650298000 |
| 6                                | -0.908967000                    | -2.570940000 | 2.250743000  | 6            | 2.068890000  | -0.571784000 | -2.999089000 |
| 6                                | -2.883112000                    | -1.243923000 | 1.625588000  | 6            | -0.356047000 | -0.705165000 | -3.404531000 |
| 6                                | -2.455436000                    | -0.206089000 | 2.535533000  | 6            | -0.365691000 | -2.029317000 | -2.821160000 |
| 6                                | -1.282967000                    | -0.365969000 | 3.273791000  | 6            | 0.822604000  | -2.594154000 | -2.347979000 |
| 6                                | -2.123489000                    | -2.405332000 | 1.485706000  | 6            | 0.841254000  | 0.010698000  | -3.495592000 |
| 6                                | -2.456173000                    | -2.359512000 | -0.950579000 | 6            | -0.319059000 | 2.066641000  | -2.805121000 |
| 6                                | -3.243199000                    | -1.156302000 | -0.805549000 | 6            | -1.556939000 | 1.328321000  | -2.719646000 |
| 6                                | -3.452926000                    | -0.608422000 | 0.459913000  | 6            | -1.575217000 | -0.036521000 | -3.014178000 |



|    |              |              |              |    |              |              |              |
|----|--------------|--------------|--------------|----|--------------|--------------|--------------|
| 6  | -1.906335000 | -2.973094000 | 0.174869000  | 6  | 0.860346000  | 1.421938000  | -3.190213000 |
| 17 | -0.000295000 | -0.001266000 | -0.000938000 | 17 | -5.906679000 | -0.000675000 | -0.000649000 |

**9. Cartesian coordinates of optimized geometry of CpML<sub>n</sub> complexes at Mo6L/6-31G(d,p) level. Atomic number followed by X, Y, Z coordinates in Å.**

|                                            |              |              |              |                                            |              |              |              |
|--------------------------------------------|--------------|--------------|--------------|--------------------------------------------|--------------|--------------|--------------|
| <b>CpScNMe<sub>3</sub>(CO)<sub>2</sub></b> |              |              |              | <b>CpScPMe<sub>3</sub>(CO)<sub>2</sub></b> |              |              |              |
| 21                                         | 0.165302000  | 0.064846000  | -0.000099000 | 21                                         | -0.628725000 | 0.076819000  | -0.496311000 |
| 7                                          | -2.166173000 | -0.142477000 | -0.000161000 | 15                                         | 2.098354000  | 0.054761000  | -0.372093000 |
| 8                                          | 1.066799000  | 2.339563000  | -2.276747000 | 8                                          | -0.406710000 | 2.362829000  | 1.923175000  |
| 8                                          | 1.066029000  | 2.338609000  | 2.277801000  | 8                                          | -3.318623000 | 1.825169000  | -1.459561000 |
| 6                                          | 0.716428000  | 1.547544000  | -1.487867000 | 6                                          | -0.466401000 | 1.596456000  | 1.038166000  |
| 6                                          | 0.715922000  | 1.546930000  | 1.488461000  | 6                                          | -2.343558000 | 1.234729000  | -1.202722000 |
| 6                                          | -2.809041000 | 1.177606000  | -0.000028000 | 6                                          | 2.910742000  | 1.701067000  | -0.461055000 |
| 1                                          | -2.503088000 | 1.736823000  | 0.888468000  | 1                                          | 2.831800000  | 2.118835000  | -1.467845000 |
| 1                                          | -2.503167000 | 1.736968000  | -0.888460000 | 1                                          | 2.417180000  | 2.387376000  | 0.231736000  |
| 6                                          | -2.534140000 | -0.893714000 | -1.207304000 | 6                                          | 2.559706000  | -0.463292000 | 1.325591000  |
| 1                                          | -2.026888000 | -1.862849000 | -1.197315000 | 1                                          | 2.212887000  | -1.480206000 | 1.523372000  |
| 1                                          | -3.620398000 | -1.059886000 | -1.266763000 | 1                                          | 3.644933000  | -0.426523000 | 1.467999000  |
| 6                                          | -2.534030000 | -0.893894000 | 1.206907000  | 6                                          | 3.266752000  | -0.959184000 | -1.376409000 |
| 1                                          | -3.620290000 | -1.060022000 | 1.266466000  | 1                                          | 4.300877000  | -0.846581000 | -1.034291000 |
| 1                                          | -2.208729000 | -0.341408000 | 2.093411000  | 1                                          | 3.215389000  | -0.667017000 | -2.428213000 |
| 1                                          | -2.026826000 | -1.863050000 | 1.196700000  | 1                                          | 2.992009000  | -2.015249000 | -1.309202000 |
| 1                                          | -3.906534000 | 1.091204000  | 0.000013000  | 1                                          | 3.970951000  | 1.636315000  | -0.196364000 |
| 1                                          | -2.208987000 | -0.341072000 | -2.093764000 | 1                                          | 2.076624000  | 0.203349000  | 2.043839000  |
| 6                                          | 2.393895000  | -0.815938000 | -0.705194000 | 6                                          | -2.142213000 | -0.820163000 | 1.159875000  |
| 6                                          | 1.372462000  | -1.688282000 | -1.152261000 | 6                                          | -0.827426000 | -1.274740000 | 1.475611000  |
| 6                                          | 0.734410000  | -2.234279000 | -0.000260000 | 6                                          | -0.417432000 | -2.158514000 | 0.438725000  |
| 6                                          | 1.372308000  | -1.688454000 | 1.151910000  | 6                                          | -1.464228000 | -2.241095000 | -0.508899000 |
| 6                                          | 2.393841000  | -0.816084000 | 0.705091000  | 6                                          | -2.527826000 | -1.423893000 | -0.066149000 |
| 1                                          | 1.140933000  | -1.918312000 | 2.184559000  | 1                                          | -0.269262000 | -1.031991000 | 2.370463000  |
| 1                                          | -0.048477000 | -2.986319000 | -0.000369000 | 1                                          | 0.523695000  | -2.695548000 | 0.388730000  |
| 1                                          | 1.141211000  | -1.917975000 | -2.184975000 | 1                                          | -1.452147000 | -2.827566000 | -1.420653000 |
| 1                                          | 3.044119000  | -0.226111000 | -1.338789000 | 1                                          | -3.473120000 | -1.282638000 | -0.573536000 |
| 1                                          | 3.044029000  | -0.226396000 | 1.338852000  | 1                                          | -2.749921000 | -0.159389000 | 1.762581000  |
| <b>CpSc(CO)<sub>4</sub></b>                |              |              |              | <b>CpTi(CO)<sub>2</sub>Cl</b>              |              |              |              |
| 6                                          | 0.644808000  | -1.035293000 | 1.857954000  | 6                                          | -1.651562000 | -0.827841000 | -1.153736000 |
| 6                                          | 1.178077000  | 0.274805000  | 1.836362000  | 6                                          | -1.959107000 | 0.482117000  | -0.705333000 |
| 6                                          | -0.766208000 | -0.938539000 | 1.831303000  | 6                                          | -1.650981000 | -0.826247000 | 1.154225000  |
| 6                                          | -1.112606000 | 0.437721000  | 1.792370000  | 6                                          | -1.469405000 | -1.646650000 | 0.000732000  |
| 6                                          | 0.094639000  | 1.190767000  | 1.796089000  | 6                                          | -1.958698000 | 0.483190000  | 0.704014000  |
| 21                                         | 0.008488000  | -0.010961000 | -0.309600000 | 22                                         | 0.236189000  | -0.236352000 | -0.000327000 |
| 6                                          | -1.127878000 | 1.844770000  | -0.890236000 | 17                                         | 2.161800000  | -1.385094000 | -0.001730000 |
| 8                                          | -1.725566000 | 2.818472000  | -1.068939000 | 8                                          | 0.755593000  | 1.939441000  | 2.300755000  |
| 6                                          | 1.137789000  | -1.863685000 | -0.928891000 | 8                                          | 0.754646000  | 1.944057000  | -2.297402000 |
| 8                                          | 1.727009000  | -2.831439000 | -1.158104000 | 6                                          | 0.566234000  | 1.165016000  | 1.458864000  |
| 6                                          | -1.864262000 | -1.113649000 | -0.907191000 | 6                                          | 0.565422000  | 1.167885000  | -1.457093000 |
| 8                                          | -2.851102000 | -1.681220000 | -1.109368000 | 1                                          | -2.140920000 | 1.343433000  | 1.334514000  |
| 6                                          | 1.844813000  | 1.152172000  | -0.907177000 | 1                                          | -1.586617000 | -1.143622000 | 2.186103000  |
| 8                                          | 2.800013000  | 1.770948000  | -1.110924000 | 1                                          | -1.223777000 | -2.701140000 | 0.001365000  |
| 1                                          | 2.229172000  | 0.532691000  | 1.862496000  | 1                                          | -1.587225000 | -1.146557000 | -2.185213000 |
| 1                                          | 1.217664000  | -1.953149000 | 1.899723000  | 1                                          | -2.141565000 | 1.341424000  | -1.337040000 |
| 1                                          | -1.459495000 | -1.769655000 | 1.853213000  |                                            |              |              |              |
| 1                                          | -2.116711000 | 0.841575000  | 1.787471000  |                                            |              |              |              |
| 1                                          | 0.173268000  | 2.270217000  | 1.793880000  |                                            |              |              |              |
| <b>CpTiCl<sub>3</sub></b>                  |              |              |              | <b>CpV(CO)<sub>2</sub></b>                 |              |              |              |
| 22                                         | -0.212729000 | 0.002797000  | -0.002505000 |                                            |              |              |              |

|                                            |              |              |              |                                            |              |              |              |
|--------------------------------------------|--------------|--------------|--------------|--------------------------------------------|--------------|--------------|--------------|
| 17                                         | -1.153564000 | -1.389897000 | -1.466865000 | 6                                          | 0.713189000  | -1.417705000 | 1.020735000  |
| 17                                         | -1.198598000 | -0.525752000 | 1.925491000  | 6                                          | -0.723935000 | -1.412272000 | 1.020370000  |
| 17                                         | -1.063343000 | 1.999444000  | -0.512767000 | 6                                          | 1.151297000  | -1.594702000 | -0.324733000 |
| 6                                          | 1.758116000  | -1.227420000 | 0.229862000  | 6                                          | -0.005797000 | -1.687619000 | -1.133376000 |
| 6                                          | 1.785783000  | -0.216331000 | 1.219973000  | 6                                          | -1.162592000 | -1.585824000 | -0.325386000 |
| 6                                          | 1.813256000  | 1.033820000  | 0.564747000  | 23                                         | 0.001347000  | 0.303111000  | -0.047513000 |
| 6                                          | 1.810402000  | -0.599194000 | -1.039914000 | 6                                          | -1.594087000 | 1.376951000  | -0.042386000 |
| 6                                          | 1.834565000  | 0.795720000  | -0.834527000 | 8                                          | -2.633477000 | 1.913336000  | -0.011074000 |
| 1                                          | 1.717858000  | -0.373366000 | 2.287046000  | 6                                          | 1.603965000  | 1.366433000  | -0.042421000 |
| 1                                          | 1.770808000  | 2.005500000  | 1.038735000  | 8                                          | 2.646561000  | 1.896534000  | -0.011089000 |
| 1                                          | 1.808993000  | 1.555615000  | -1.603683000 | 1                                          | -0.005745000 | -1.753804000 | -2.216379000 |
| 1                                          | 1.763906000  | -1.102015000 | -1.995639000 | 1                                          | 2.176784000  | -1.654239000 | -0.661652000 |
| 1                                          | 1.669326000  | -2.291348000 | 0.408201000  | 1                                          | 1.357717000  | -1.343324000 | 1.887471000  |
|                                            |              |              |              | 1                                          | -1.368328000 | -1.333118000 | 1.886776000  |
|                                            |              |              |              | 1                                          | -2.188308000 | -1.637599000 | -0.662914000 |
| <b>CpV(CO)<sub>3</sub></b>                 |              |              |              | <b>CpV(CO)<sub>4</sub></b>                 |              |              |              |
| 6                                          | -1.924754000 | 1.150085000  | -0.007506000 | 6                                          | -2.001224000 | -0.521707000 | 1.013121000  |
| 6                                          | -2.252332000 | 0.000528000  | -0.763132000 | 6                                          | -1.984940000 | 0.870213000  | 0.761926000  |
| 6                                          | -1.386619000 | 0.710617000  | 1.233418000  | 6                                          | -1.919295000 | -1.196145000 | -0.229854000 |
| 6                                          | -1.385847000 | -0.716726000 | 1.230640000  | 6                                          | -1.852056000 | -0.215929000 | -1.257356000 |
| 6                                          | -1.923670000 | -1.151790000 | -0.012113000 | 6                                          | -1.892810000 | 1.064863000  | -0.639715000 |
| 23                                         | -0.006370000 | 0.000107000  | -0.326690000 | 23                                         | -0.025267000 | 0.000245000  | 0.001276000  |
| 6                                          | 0.962759000  | -1.620023000 | -0.748812000 | 6                                          | 0.964633000  | 0.902611000  | -1.400045000 |
| 8                                          | 1.522343000  | -2.621635000 | -0.952912000 | 8                                          | 1.530159000  | 1.448996000  | -2.256124000 |
| 6                                          | 0.960218000  | 1.622081000  | -0.748165000 | 6                                          | 0.857898000  | -0.910269000 | 1.473272000  |
| 8                                          | 1.517656000  | 2.624871000  | -0.952250000 | 8                                          | 1.362407000  | -1.464408000 | 2.361345000  |
| 6                                          | 1.400379000  | 0.000582000  | 0.971493000  | 6                                          | 0.943958000  | -1.434411000 | -0.872382000 |
| 8                                          | 2.252310000  | 0.000837000  | 1.768526000  | 8                                          | 1.497248000  | -2.304783000 | -1.408469000 |
| 1                                          | -1.059083000 | -1.354703000 | 2.040070000  | 6                                          | 0.877642000  | 1.442201000  | 0.938594000  |
| 1                                          | -1.059891000 | 1.345742000  | 2.045110000  | 8                                          | 1.393479000  | 2.318246000  | 1.501533000  |
| 1                                          | -2.066231000 | 2.177158000  | -0.315052000 | 1                                          | -2.022798000 | 1.650222000  | 1.510669000  |
| 1                                          | -2.643156000 | 0.002413000  | -1.774491000 | 1                                          | -2.051664000 | -0.989529000 | 1.987367000  |
| 1                                          | -2.064402000 | -2.177772000 | -0.323613000 | 1                                          | -1.911035000 | -2.268491000 | -0.370897000 |
|                                            |              |              |              | 1                                          | -1.796930000 | -0.409787000 | -2.319811000 |
|                                            |              |              |              | 1                                          | -1.865618000 | 2.018985000  | -1.148323000 |
| <b>CpCr(CO)<sub>2</sub>Cl</b>              |              |              |              | <b>CpCr(CO)<sub>2</sub>H</b>               |              |              |              |
| 6                                          | 1.431650000  | -0.992694000 | -1.145328000 | 6                                          | -1.468779000 | 1.233627000  | 0.409958000  |
| 6                                          | 1.052826000  | -1.742266000 | 0.003893000  | 6                                          | -0.927038000 | 0.304906000  | 1.353577000  |
| 6                                          | 2.104200000  | 0.186868000  | 0.700031000  | 6                                          | -1.949434000 | -0.885743000 | -0.338826000 |
| 6                                          | 2.103959000  | 0.182946000  | -0.703139000 | 6                                          | -2.098235000 | 0.489810000  | -0.617599000 |
| 6                                          | 1.432164000  | -0.986396000 | 1.148962000  | 6                                          | -1.220063000 | -1.007453000 | 0.882353000  |
| 24                                         | -0.018008000 | 0.109995000  | -0.000434000 | 24                                         | 0.058809000  | -0.015164000 | -0.484412000 |
| 17                                         | -0.315573000 | 2.301320000  | -0.001935000 | 1                                          | 0.292754000  | -1.286827000 | -1.436611000 |
| 8                                          | -2.180651000 | -0.815209000 | 1.850866000  | 8                                          | 2.202659000  | -1.949275000 | 0.210918000  |
| 8                                          | -2.180632000 | -0.819865000 | -1.849585000 | 8                                          | 2.221185000  | 1.988076000  | 0.109384000  |
| 6                                          | -1.341236000 | -0.439086000 | 1.137478000  | 6                                          | 1.385644000  | -1.160818000 | -0.071053000 |
| 6                                          | -1.341205000 | -0.442097000 | -1.137089000 | 6                                          | 1.374440000  | 1.226917000  | -0.147403000 |
| 1                                          | 1.276133000  | -1.285340000 | -2.174894000 | 1                                          | -1.424381000 | 2.312043000  | 0.478244000  |
| 1                                          | 2.465883000  | 0.982148000  | -1.336714000 | 1                                          | -2.564770000 | 0.904954000  | -1.503317000 |
| 1                                          | 2.466437000  | 0.989571000  | 1.328963000  | 1                                          | -2.315280000 | -1.702018000 | -0.945752000 |
| 1                                          | 1.277184000  | -1.273709000 | 2.180109000  | 1                                          | -0.957730000 | -1.934354000 | 1.373767000  |
| 1                                          | 0.547410000  | -2.698053000 | 0.006763000  | 1                                          | -0.411972000 | 0.552265000  | 2.271103000  |
| <b>CpMn(CO)<sub>2</sub>NMe<sub>3</sub></b> |              |              |              | <b>CpMn(CO)<sub>2</sub>PMe<sub>3</sub></b> |              |              |              |
| 25                                         | 0.387396000  | 0.163663000  | 0.000037000  | 25                                         | -0.604715000 | 0.179437000  | 0.000266000  |
| 7                                          | -1.669694000 | -0.513282000 | -0.000199000 | 15                                         | 1.539694000  | -0.348823000 | -0.001371000 |
| 8                                          | -0.062088000 | 2.077353000  | -2.178543000 | 8                                          | -0.168304000 | 2.109987000  | 2.169451000  |
| 8                                          | -0.062859000 | 2.076597000  | 2.179112000  | 8                                          | -0.175121000 | 2.116017000  | -2.164882000 |
| 6                                          | 0.074985000  | 1.322592000  | -1.289489000 | 6                                          | -0.322669000 | 1.353064000  | 1.286948000  |

|                               |              |              |              |                               |              |              |              |
|-------------------------------|--------------|--------------|--------------|-------------------------------|--------------|--------------|--------------|
| 6                             | 0.074522000  | 1.322172000  | 1.289807000  | 6                             | -0.326100000 | 1.356322000  | -1.284224000 |
| 6                             | -2.596376000 | 0.636546000  | -0.000213000 | 6                             | 2.701974000  | 1.060974000  | -0.010031000 |
| 1                             | -2.423406000 | 1.247943000  | 0.886499000  | 1                             | 2.522432000  | 1.673764000  | -0.896977000 |
| 1                             | -2.423218000 | 1.248071000  | -0.886801000 | 1                             | 2.524216000  | 1.683085000  | 0.870788000  |
| 6                             | -1.953315000 | -1.316019000 | -1.202085000 | 6                             | 2.154922000  | -1.316783000 | 1.429877000  |
| 1                             | -1.309657000 | -2.196919000 | -1.225175000 | 1                             | 1.616652000  | -2.264757000 | 1.512215000  |
| 1                             | -3.003546000 | -1.645261000 | -1.216850000 | 1                             | 3.225693000  | -1.528755000 | 1.348082000  |
| 6                             | -1.953535000 | -1.316191000 | 1.201512000  | 6                             | 2.151116000  | -1.331355000 | -1.424338000 |
| 1                             | -3.003753000 | -1.645483000 | 1.216014000  | 1                             | 3.222378000  | -1.541217000 | -1.343586000 |
| 1                             | -1.754555000 | -0.715101000 | 2.091201000  | 1                             | 1.969170000  | -0.773885000 | -2.347031000 |
| 1                             | -1.309845000 | -2.197070000 | 1.224615000  | 1                             | 1.613797000  | -2.280825000 | -1.494751000 |
| 1                             | -3.640126000 | 0.287680000  | -0.000345000 | 1                             | 3.745401000  | 0.731428000  | -0.009242000 |
| 1                             | -1.754112000 | -0.714816000 | -2.091644000 | 1                             | 1.976387000  | -0.749116000 | 2.347025000  |
| 6                             | 2.330695000  | -0.093584000 | -0.708506000 | 6                             | -2.536877000 | -0.261886000 | 0.704790000  |
| 6                             | 1.542204000  | -1.203880000 | -1.155972000 | 6                             | -1.630059000 | -1.271158000 | 1.155278000  |
| 6                             | 1.072717000  | -1.871404000 | -0.000086000 | 6                             | -1.077040000 | -1.889314000 | 0.004004000  |
| 6                             | 1.542191000  | -1.204168000 | 1.155926000  | 6                             | -1.624571000 | -1.276213000 | -1.152937000 |
| 6                             | 2.330661000  | -0.093727000 | 0.708807000  | 6                             | -2.533555000 | -0.265239000 | -0.710946000 |
| 1                             | 2.840876000  | 0.617613000  | 1.344282000  | 1                             | -3.110595000 | 0.389654000  | -1.349515000 |
| 1                             | 2.841425000  | 0.617553000  | -1.343794000 | 1                             | -1.399932000 | -1.531245000 | -2.179776000 |
| 1                             | 1.362494000  | -1.492016000 | -2.182964000 | 1                             | -3.116701000 | 0.395996000  | 1.337707000  |
| 1                             | 0.429815000  | -2.744514000 | -0.000206000 | 1                             | -1.409334000 | -1.520766000 | 2.184303000  |
| 1                             | 1.361651000  | -1.491907000 | 2.182885000  | 1                             | -0.352520000 | -2.695451000 | 0.007611000  |
| <b>CpMn(CO)<sub>3</sub></b>   |              |              |              | <b>CpFe(CO)<sub>2</sub>Br</b> |              |              |              |
| 25                            | -0.054779000 | 0.001355000  | -0.004389000 | 6                             | 1.661947000  | 1.150479000  | 0.434752000  |
| 6                             | -1.061636000 | -0.126922000 | 1.463385000  | 6                             | 1.746032000  | 0.710630000  | -0.927773000 |
| 8                             | -1.671488000 | -0.214871000 | 2.449566000  | 6                             | 1.661089000  | -1.154645000 | 0.427085000  |
| 6                             | -1.017739000 | 1.363444000  | -0.640856000 | 6                             | 1.627141000  | -0.004845000 | 1.250841000  |
| 8                             | -1.596700000 | 2.279904000  | -1.062197000 | 6                             | 1.745423000  | -0.705829000 | -0.932530000 |
| 6                             | -1.025786000 | -1.224509000 | -0.865461000 | 26                            | 0.016838000  | 0.000333000  | -0.094384000 |
| 8                             | -1.610083000 | -2.052000000 | -1.436749000 | 17                            | -1.354553000 | -0.004581000 | 1.770324000  |
| 6                             | 1.673478000  | -0.073785000 | 1.224505000  | 8                             | -1.555556000 | -2.170413000 | -1.252700000 |
| 6                             | 1.674233000  | -1.178683000 | 0.332788000  | 8                             | -1.552983000 | 2.178767000  | -1.241530000 |
| 6                             | 1.702060000  | -0.656225000 | -0.995515000 | 6                             | -0.956843000 | -1.297219000 | -0.790986000 |
| 6                             | 1.706582000  | 0.755251000  | -0.916462000 | 6                             | -0.955376000 | 1.302512000  | -0.784184000 |
| 6                             | 1.683063000  | 1.123383000  | 0.463793000  | 1                             | 1.786168000  | -1.337754000 | -1.809778000 |
| 1                             | 1.635450000  | -0.134784000 | 2.304131000  | 1                             | 1.621983000  | -2.181196000 | 0.762882000  |
| 1                             | 1.666690000  | -2.223771000 | 0.608183000  | 1                             | 1.787421000  | 1.348382000  | -1.800774000 |
| 1                             | 1.698322000  | -1.240782000 | -1.905603000 | 1                             | 1.623970000  | 2.174788000  | 0.777432000  |
| 1                             | 1.708786000  | 1.438726000  | -1.754594000 | 1                             | 1.461909000  | -0.008316000 | 2.319322000  |
| 1                             | 1.680865000  | 2.130752000  | 0.855586000  |                               |              |              |              |
| <b>CpFe(CO)<sub>2</sub>Cl</b> |              |              |              | <b>CpCoCONMe<sub>3</sub></b>  |              |              |              |
| 6                             | -1.504735000 | -1.144099000 | -1.152408000 | 27                            | -0.358100000 | 0.208449000  | -0.000192000 |
| 6                             | -2.310972000 | -0.044480000 | -0.708540000 | 7                             | 1.606186000  | -0.391932000 | 0.000004000  |
| 6                             | -1.505395000 | -1.143544000 | 1.152553000  | 8                             | 0.223600000  | 3.031349000  | -0.000034000 |
| 6                             | -1.033517000 | -1.816591000 | 0.000388000  | 6                             | 0.001077000  | 1.878063000  | -0.000117000 |
| 6                             | -2.311347000 | -0.044090000 | 0.707705000  | 6                             | 2.576959000  | 0.720980000  | -0.003878000 |
| 26                            | -0.402337000 | 0.185635000  | 0.000025000  | 1                             | 2.423446000  | 1.337646000  | -0.890468000 |
| 35                            | 1.866499000  | -0.654132000 | -0.000139000 | 1                             | 2.425176000  | 1.342409000  | 0.879672000  |
| 8                             | 0.314035000  | 1.992504000  | 2.176817000  | 6                             | 1.867307000  | -1.202470000 | 1.204507000  |
| 8                             | 0.313733000  | 1.993162000  | -2.176290000 | 1                             | 1.205039000  | -2.068657000 | 1.220711000  |
| 6                             | 0.053296000  | 1.286748000  | 1.299264000  | 1                             | 2.912907000  | -1.548318000 | 1.223065000  |
| 6                             | 0.053129000  | 1.287131000  | -1.298917000 | 6                             | 1.866174000  | -1.209520000 | -1.199994000 |
| 1                             | -2.817452000 | 0.671874000  | 1.341588000  | 1                             | 2.911858000  | -1.555141000 | -1.217626000 |
| 1                             | -1.284668000 | -1.404503000 | 2.177979000  | 1                             | 1.667893000  | -0.609976000 | -2.089985000 |
| 1                             | -2.816682000 | 0.671198000  | -1.343065000 | 1                             | 1.204257000  | -2.076047000 | -1.210378000 |
| 1                             | -1.283425000 | -1.405570000 | -2.177577000 | 1                             | 3.605301000  | 0.329847000  | -0.003788000 |
| 1                             | -0.329366000 | -2.636678000 | 0.000796000  | 1                             | 1.670132000  | -0.597600000 | 2.091129000  |
|                               |              |              |              | 6                             | -2.220892000 | 0.196889000  | 0.718700000  |
|                               |              |              |              | 6                             | -1.579665000 | -0.982793000 | 1.175903000  |

|                         |   |              |              |              |
|-------------------------|---|--------------|--------------|--------------|
|                         | 6 | -1.146645000 | -1.672769000 | 0.003132000  |
|                         | 6 | -1.576852000 | -0.987881000 | -1.173932000 |
|                         | 6 | -2.219380000 | 0.193603000  | -0.723774000 |
|                         | 1 | -2.639549000 | 0.971489000  | -1.347502000 |
|                         | 1 | -1.460620000 | -1.324650000 | -2.195011000 |
|                         | 1 | -0.588398000 | -2.603798000 | 0.005894000  |
|                         | 1 | -1.466699000 | -1.314984000 | 2.198835000  |
|                         | 1 | -2.642654000 | 0.977773000  | 1.337599000  |
| CpCoCOPEt <sub>3</sub>  |   |              |              |              |
| 27                      |   | -0.930658000 | 0.331911000  | -0.081593000 |
| 8                       |   | -0.215979000 | 3.116647000  | -0.129043000 |
| 6                       |   | -0.511587000 | 1.981122000  | -0.133035000 |
| 6                       |   | -2.834440000 | 0.361775000  | 0.599357000  |
| 6                       |   | -2.160236000 | -0.746794000 | 1.166838000  |
| 6                       |   | -1.686932000 | -1.538916000 | 0.075080000  |
| 6                       |   | -2.120312000 | -0.960768000 | -1.162044000 |
| 6                       |   | -2.811623000 | 0.228581000  | -0.833374000 |
| 15                      |   | 1.119573000  | -0.246105000 | 0.039795000  |
| 6                       |   | 1.846381000  | -1.270491000 | -1.316824000 |
| 1                       |   | 1.763175000  | -0.678133000 | -2.234485000 |
| 1                       |   | 2.920418000  | -1.383908000 | -1.110241000 |
| 6                       |   | 1.192955000  | -2.626672000 | -1.512937000 |
| 1                       |   | 0.143189000  | -2.521260000 | -1.800362000 |
| 1                       |   | 1.230316000  | -3.236503000 | -0.603680000 |
| 1                       |   | 1.693261000  | -3.193930000 | -2.302579000 |
| 6                       |   | 2.379610000  | 1.093833000  | 0.157771000  |
| 1                       |   | 2.018690000  | 1.804864000  | 0.908539000  |
| 1                       |   | 3.306764000  | 0.656135000  | 0.552245000  |
| 6                       |   | 2.645329000  | 1.809835000  | -1.157571000 |
| 1                       |   | 1.720002000  | 2.171795000  | -1.613685000 |
| 1                       |   | 3.143954000  | 1.157147000  | -1.880114000 |
| 1                       |   | 3.291790000  | 2.677530000  | -1.002316000 |
| 6                       |   | 1.528637000  | -1.258448000 | 1.531355000  |
| 1                       |   | 0.857495000  | -2.125870000 | 1.532093000  |
| 1                       |   | 2.550562000  | -1.648777000 | 1.426014000  |
| 6                       |   | 1.374720000  | -0.474786000 | 2.824677000  |
| 1                       |   | 0.372572000  | -0.039641000 | 2.901364000  |
| 1                       |   | 2.092434000  | 0.349067000  | 2.884375000  |
| 1                       |   | 1.535478000  | -1.112310000 | 3.698281000  |
| 1                       |   | -2.030524000 | -0.963527000 | 2.218527000  |
| 1                       |   | -1.116634000 | -2.455245000 | 0.172174000  |
| 1                       |   | -1.959978000 | -1.363933000 | -2.152491000 |
| 1                       |   | -3.241363000 | 0.931948000  | -1.533782000 |
| 1                       |   | -3.284599000 | 1.181728000  | 1.142788000  |
| CpNiNEt <sub>3</sub> Cl |   |              |              |              |
| 6                       |   | 2.230428000  | -0.142872000 | 1.394117000  |
| 6                       |   | 1.588951000  | 1.115220000  | 1.264732000  |
| 6                       |   | 1.842463000  | 1.666885000  | -0.049591000 |
| 6                       |   | 2.536694000  | 0.693863000  | -0.771687000 |
| 6                       |   | 2.716710000  | -0.447976000 | 0.100626000  |
| 28                      |   | 0.754110000  | -0.102346000 | -0.109772000 |
| 17                      |   | 0.503875000  | -1.849792000 | -1.459800000 |
| 7                       |   | -1.205630000 | 0.249478000  | 0.273528000  |
| 6                       |   | -2.127742000 | -0.460085000 | -0.667789000 |
| 1                       |   | -1.824652000 | -0.178715000 | -1.678310000 |
| 1                       |   | -1.895092000 | -1.521873000 | -0.598572000 |
| 6                       |   | -3.606736000 | -0.208848000 | -0.447743000 |
| 1                       |   | -3.946585000 | -0.522756000 | 0.544091000  |
| 1                       |   | -4.173404000 | -0.791271000 | -1.178142000 |
| 1                       |   | -3.890629000 | 0.839640000  | -0.582675000 |
| 6                       |   | -1.455919000 | 1.719478000  | 0.215678000  |
| 1                       |   | -2.445931000 | 1.929331000  | 0.648268000  |
| 1                       |   | -0.725430000 | 2.189258000  | 0.880013000  |
| 6                       |   | -1.359382000 | 2.297538000  | -1.178558000 |
| 1                       |   | -0.458573000 | 1.936873000  | -1.686415000 |
| 1                       |   | -1.308062000 | 3.387918000  | -1.127190000 |
| 1                       |   | -2.223786000 | 2.037777000  | -1.795573000 |
| 6                       |   | -1.452200000 | -0.195669000 | 1.678162000  |
| 1                       |   | -0.740410000 | 0.353320000  | 2.302204000  |
| 1                       |   | -2.456146000 | 0.133809000  | 1.987797000  |
| 6                       |   | -1.293579000 | -1.685747000 | 1.880922000  |
| 1                       |   | -2.126702000 | -2.253655000 | 1.458493000  |
| 1                       |   | -1.250754000 | -1.911101000 | 2.949180000  |
| 1                       |   | -0.370966000 | -2.044275000 | 1.412811000  |
| 1                       |   | 3.157666000  | -1.386163000 | -0.208460000 |
| 1                       |   | 2.835161000  | 0.735398000  | -1.810001000 |
| 1                       |   | 1.537014000  | 2.647225000  | -0.391952000 |
| 1                       |   | 1.066792000  | 1.638240000  | 2.059543000  |
| 1                       |   | 2.280809000  | -0.763893000 | 2.277181000  |
| CpNiPMe <sub>3</sub> Cl |   |              |              |              |
| 6                       |   | 2.127091000  | -0.587710000 | -1.206900000 |
| 6                       |   | 1.392527000  | -1.608964000 | -0.559432000 |
| 6                       |   | 1.508888000  | -1.431376000 | 0.879263000  |
| 6                       |   | 2.270162000  | -0.276865000 | 1.109230000  |
| 6                       |   | 2.573556000  | 0.284833000  | -0.177986000 |
| 28                      |   | 0.557633000  | 0.120630000  | -0.019226000 |
| 17                      |   | 0.083188000  | 2.295559000  | 0.000269000  |
| 15                      |   | -1.523991000 | -0.318787000 | -0.004683000 |
| 6                       |   | -2.399863000 | 0.338343000  | 1.451708000  |
| 1                       |   | -2.011559000 | -0.123751000 | 2.362224000  |
| 1                       |   | -2.208414000 | 1.412435000  | 1.504518000  |
| 6                       |   | -2.016583000 | -2.078388000 | -0.028722000 |
| 1                       |   | -3.103089000 | -2.186202000 | 0.043450000  |
| 1                       |   | -1.683506000 | -2.549595000 | -0.956552000 |
| 6                       |   | -2.461532000 | 0.395926000  | -1.393115000 |
| CpCuNMe <sub>3</sub>    |   |              |              |              |
| 29                      |   | 0.227714000  | 0.127234000  | 0.005176000  |
| 7                       |   | -1.724901000 | 0.003491000  | -0.000052000 |
| 6                       |   | -2.171939000 | -0.573845000 | 1.278333000  |
| 1                       |   | -1.687059000 | -1.541352000 | 1.423412000  |
| 1                       |   | -1.877242000 | 0.086511000  | 2.096090000  |
| 6                       |   | -2.366230000 | 1.313874000  | -0.188017000 |
| 1                       |   | -2.036062000 | 1.746254000  | -1.134325000 |
| 1                       |   | -3.465657000 | 1.222245000  | -0.195832000 |
| 6                       |   | -2.128284000 | -0.893028000 | -1.096294000 |
| 1                       |   | -3.222012000 | -1.033048000 | -1.117501000 |
| 1                       |   | -1.641740000 | -1.861563000 | -0.964081000 |
| 1                       |   | -1.801116000 | -0.469699000 | -2.047880000 |
| 1                       |   | -3.266622000 | -0.707597000 | 1.296143000  |
| 1                       |   | -2.068452000 | 1.982439000  | 0.621776000  |
| 6                       |   | 1.866951000  | -0.357627000 | 1.175173000  |

|                      |              |              |              |        |              |              |              |
|----------------------|--------------|--------------|--------------|--------|--------------|--------------|--------------|
| 1                    | -2.110973000 | -0.024649000 | -2.338191000 | 6      | 1.983957000  | 0.963472000  | 0.643295000  |
| 1                    | -3.535117000 | 0.207051000  | -1.292648000 | 6      | 1.969754000  | 0.865549000  | -0.783842000 |
| 1                    | -1.558208000 | -2.611374000 | 0.808004000  | 6      | 1.845032000  | -0.515110000 | -1.128216000 |
| 1                    | -3.477717000 | 0.157339000  | 1.389102000  | 6      | 1.784528000  | -1.268115000 | 0.080716000  |
| 1                    | -2.275191000 | 1.472019000  | -1.406963000 | 1      | 2.117590000  | 1.682773000  | -1.477864000 |
| 1                    | 1.093080000  | -2.094865000 | 1.626865000  | 1      | 2.143641000  | 1.867555000  | 1.216421000  |
| 1                    | 2.525803000  | 0.158599000  | 2.064519000  | 1      | 1.924674000  | -0.626941000 | 2.222091000  |
| 1                    | 0.878417000  | -2.431883000 | -1.041206000 | 1      | 1.765748000  | -2.348303000 | 0.154674000  |
| 1                    | 2.265796000  | -0.455771000 | -2.269870000 | 1      | 1.882300000  | -0.924511000 | -2.129749000 |
| 1                    | 3.067154000  | 1.235516000  | -0.333545000 |        |              |              |              |
| CpCuNMe <sub>3</sub> |              |              |              | CpCuCO |              |              |              |
| 29                   | 0.812840000  | 0.034940000  | 0.067624000  | 29     | 0.329719000  | -0.001933000 | -0.000865000 |
| 15                   | -1.278890000 | -0.009791000 | -0.023510000 | 8      | 3.226737000  | 0.001097000  | 0.000561000  |
| 6                    | 2.528652000  | -0.410148000 | 1.166163000  | 6      | 2.069285000  | -0.001189000 | -0.000465000 |
| 6                    | 2.530984000  | 0.966301000  | 0.797389000  | 6      | -1.359993000 | 1.068721000  | 0.574966000  |
| 6                    | 2.510475000  | 1.040474000  | -0.625711000 | 6      | -1.362159000 | -0.214826000 | 1.192947000  |
| 6                    | 2.492488000  | -0.289633000 | -1.135462000 | 6      | -1.365128000 | -1.199396000 | 0.163326000  |
| 6                    | 2.504359000  | -1.186360000 | -0.028945000 | 6      | -1.364934000 | -0.524200000 | -1.091067000 |
| 6                    | -2.215708000 | 0.140008000  | 1.558145000  | 6      | -1.361600000 | 0.877436000  | -0.836834000 |
| 1                    | -2.105903000 | 1.177735000  | 1.894219000  | 1      | -1.385991000 | -0.993185000 | -2.065158000 |
| 1                    | -3.285331000 | -0.017278000 | 1.363956000  | 1      | -1.387044000 | -2.270660000 | 0.308438000  |
| 6                    | -1.700146000 | -0.812273000 | 2.623845000  | 1      | -1.380669000 | -0.407800000 | 2.256733000  |
| 1                    | -0.628330000 | -0.658609000 | 2.789991000  | 1      | -1.375869000 | 2.020778000  | 1.087337000  |
| 1                    | -1.834520000 | -1.858674000 | 2.330907000  | 1      | -1.378979000 | 1.658864000  | -1.583995000 |
| 1                    | -2.217506000 | -0.670669000 | 3.576491000  |        |              |              |              |
| 6                    | -2.072262000 | 1.294580000  | -1.059080000 |        |              |              |              |
| 1                    | -1.810031000 | 1.072470000  | -2.100257000 |        |              |              |              |
| 1                    | -3.164519000 | 1.208775000  | -0.982342000 |        |              |              |              |
| 6                    | -1.597186000 | 2.688426000  | -0.684175000 |        |              |              |              |
| 1                    | -0.503490000 | 2.742371000  | -0.722367000 |        |              |              |              |
| 1                    | -1.898187000 | 2.957715000  | 0.333473000  |        |              |              |              |
| 1                    | -2.001741000 | 3.449139000  | -1.357172000 |        |              |              |              |
| 6                    | -1.982696000 | -1.554786000 | -0.746009000 |        |              |              |              |
| 1                    | -1.867655000 | -2.339132000 | 0.011483000  |        |              |              |              |
| 1                    | -3.061134000 | -1.428649000 | -0.910301000 |        |              |              |              |
| 6                    | -1.263245000 | -1.954320000 | -2.023400000 |        |              |              |              |
| 1                    | -0.184122000 | -2.017003000 | -1.841783000 |        |              |              |              |
| 1                    | -1.412434000 | -1.216719000 | -2.818931000 |        |              |              |              |
| 1                    | -1.608849000 | -2.920179000 | -2.401285000 |        |              |              |              |
| 1                    | 2.586721000  | -0.797928000 | 2.174728000  |        |              |              |              |
| 1                    | 2.538967000  | -2.266481000 | -0.086348000 |        |              |              |              |
| 1                    | 2.511920000  | -0.570060000 | -2.180675000 |        |              |              |              |
| 1                    | 2.548719000  | 1.947165000  | -1.215485000 |        |              |              |              |
| 1                    | 2.594128000  | 1.806008000  | 1.476701000  |        |              |              |              |

**10. Cartesian coordinates of optimized geometry of (C<sub>60</sub>)ML<sub>n</sub> complexes at Mo6L/6-31G(d,p) level. Atomic number followed by X, Y, Z coordinates in Å.**

|                                                        |             |              |              |                                                        |             |              |              |
|--------------------------------------------------------|-------------|--------------|--------------|--------------------------------------------------------|-------------|--------------|--------------|
| (C <sub>60</sub> )ScNMe <sub>3</sub> (CO) <sub>2</sub> |             |              |              | (C <sub>60</sub> )ScPMe <sub>3</sub> (CO) <sub>2</sub> |             |              |              |
| 21                                                     | 4.303208000 | -0.320936000 | 0.000010000  | 21                                                     | 4.099981000 | 0.931549000  | -0.597391000 |
| 7                                                      | 5.724179000 | 1.458180000  | -0.000299000 | 15                                                     | 5.663338000 | -1.295651000 | -0.267677000 |
| 8                                                      | 5.242952000 | -2.522955000 | -2.375561000 | 8                                                      | 4.587462000 | 1.525837000  | 2.654163000  |
| 8                                                      | 5.243111000 | -2.522483000 | 2.375955000  | 8                                                      | 4.120682000 | 4.285905000  | -0.953054000 |
| 6                                                      | 4.940228000 | -1.747885000 | -1.574754000 | 6                                                      | 4.523375000 | 1.352583000  | 1.511392000  |
| 6                                                      | 4.940328000 | -1.747572000 | 1.575017000  | 6                                                      | 4.194039000 | 3.136092000  | -0.885347000 |
| 6                                                      | 7.144319000 | 1.058427000  | -0.000349000 | 6                                                      | 7.356476000 | -0.985829000 | 0.355675000  |
| 1                                                      | 7.364811000 | 0.463891000  | 0.890235000  | 1                                                      | 7.959533000 | -0.467359000 | -0.393048000 |
| 1                                                      | 7.364692000 | 0.463695000  | -0.890832000 | 1                                                      | 7.318789000 | -0.365394000 | 1.254563000  |
| 6                                                      | 5.411376000 | 2.244139000  | -1.211454000 | 6                                                      | 4.924339000 | -2.304198000 | 1.065131000  |

|   |              |              |              |   |              |              |              |
|---|--------------|--------------|--------------|---|--------------|--------------|--------------|
| 1 | 4.355418000  | 2.531646000  | -1.197399000 | 1 | 3.935526000  | -2.661602000 | 0.764824000  |
| 1 | 6.021907000  | 3.154643000  | -1.262551000 | 1 | 5.553470000  | -3.169813000 | 1.292337000  |
| 6 | 5.411538000  | 2.244422000  | 1.210714000  | 6 | 5.933230000  | -2.517117000 | -1.604033000 |
| 1 | 6.022055000  | 3.154952000  | 1.261504000  | 1 | 6.502441000  | -3.376332000 | -1.237751000 |
| 1 | 5.609093000  | 1.644509000  | 2.103839000  | 1 | 6.481732000  | -2.066993000 | -2.434309000 |
| 1 | 4.355571000  | 2.531902000  | 1.196744000  | 1 | 4.972828000  | -2.874533000 | -1.984040000 |
| 1 | 7.802554000  | 1.936631000  | -0.000490000 | 1 | 7.853887000  | -1.926965000 | 0.606827000  |
| 1 | 5.608786000  | 1.644007000  | -2.104464000 | 1 | 4.806662000  | -1.701040000 | 1.968836000  |
| 6 | -3.500545000 | 2.312051000  | 1.420496000  | 6 | -3.718587000 | -2.288446000 | -1.247959000 |
| 6 | -2.798041000 | 1.829486000  | 2.588607000  | 6 | -3.235723000 | -1.669567000 | -2.460421000 |
| 6 | -4.358209000 | 1.461963000  | 0.722640000  | 6 | -4.463669000 | -1.542848000 | -0.335124000 |
| 6 | -2.985285000 | 0.516171000  | 3.023095000  | 6 | -3.518099000 | -0.326559000 | -2.719745000 |
| 6 | -1.851042000 | -0.260057000 | 3.465600000  | 6 | -2.491922000 | 0.532171000  | -3.265527000 |
| 6 | -1.476367000 | 2.412051000  | 2.590248000  | 6 | -1.918323000 | -2.194605000 | -2.737677000 |
| 6 | -0.382544000 | 1.664338000  | 3.023362000  | 6 | -0.933215000 | -1.368334000 | -3.275293000 |
| 6 | -0.576045000 | 0.303383000  | 3.469696000  | 6 | -1.225628000 | 0.021282000  | -3.544021000 |
| 6 | -3.500548000 | 2.311730000  | -1.420970000 | 6 | -3.240996000 | -2.563365000 | 1.540742000  |
| 6 | -2.610810000 | 3.191233000  | -0.697848000 | 6 | -2.464062000 | -3.333472000 | 0.593816000  |
| 6 | -4.358211000 | 1.461800000  | -0.722919000 | 6 | -4.220899000 | -1.682905000 | 1.083931000  |
| 6 | -2.610809000 | 3.191391000  | 0.697175000  | 6 | -2.700046000 | -3.200662000 | -0.774753000 |
| 6 | -1.358800000 | 3.254886000  | 1.417377000  | 6 | -1.586621000 | -3.142007000 | -1.693299000 |
| 6 | -1.358802000 | 3.254565000  | -1.418069000 | 6 | -1.109694000 | -3.419841000 | 1.089748000  |
| 6 | -0.156233000 | 3.325405000  | -0.721269000 | 6 | -0.035877000 | -3.369897000 | 0.201340000  |
| 6 | -0.156232000 | 3.325569000  | 0.720558000  | 6 | -0.280129000 | -3.228687000 | -1.215172000 |
| 6 | -3.874935000 | -0.365038000 | -2.298654000 | 6 | -3.514117000 | 0.001312000  | 2.732031000  |
| 6 | -2.985293000 | 0.515485000  | -3.023163000 | 6 | -2.495980000 | -0.910126000 | 3.202794000  |
| 6 | -4.548545000 | 0.099141000  | -1.169621000 | 6 | -4.361083000 | -0.378331000 | 1.690956000  |
| 6 | -2.798049000 | 1.828900000  | -2.588974000 | 6 | -2.364408000 | -2.171417000 | 2.620391000  |
| 6 | -1.476374000 | 2.411464000  | -2.590750000 | 6 | -1.047143000 | -2.697844000 | 2.342930000  |
| 6 | -1.851053000 | -0.260842000 | -3.465495000 | 6 | -1.319066000 | -0.137816000 | 3.530950000  |
| 6 | -0.576056000 | 0.302597000  | -3.469725000 | 6 | -0.053196000 | -0.650072000 | 3.269677000  |
| 6 | -0.382553000 | 1.663653000  | -3.023698000 | 6 | 0.082899000  | -1.951328000 | 2.665857000  |
| 6 | -4.106556000 | -2.020928000 | 0.000255000  | 6 | -4.170922000 | 1.859372000  | 0.686404000  |
| 6 | -3.404681000 | -2.500019000 | -1.168507000 | 6 | -3.295894000 | 2.254748000  | 1.766301000  |
| 6 | -4.665184000 | -0.742158000 | 0.000111000  | 6 | -4.694135000 | 0.567193000  | 0.648656000  |
| 6 | -3.292487000 | -1.688054000 | -2.297973000 | 6 | -2.967863000 | 1.339236000  | 2.767900000  |
| 6 | -2.040149000 | -1.624662000 | -3.016760000 | 6 | -1.612935000 | 1.258226000  | 3.263290000  |
| 6 | -2.270632000 | -3.278495000 | -0.723411000 | 6 | -2.269073000 | 3.112416000  | 1.220403000  |
| 6 | -1.067009000 | -3.224206000 | -1.423776000 | 6 | -0.963947000 | 3.033277000  | 1.701994000  |
| 6 | -0.950100000 | -2.382130000 | -2.591821000 | 6 | -0.626481000 | 2.089154000  | 2.740861000  |
| 6 | -3.874928000 | -0.364517000 | 2.298787000  | 6 | -4.294581000 | 0.444110000  | -1.777192000 |
| 6 | -3.292479000 | -1.687532000 | 2.298405000  | 6 | -3.747974000 | 1.782569000  | -1.736757000 |
| 6 | -4.548541000 | 0.099405000  | 1.169652000  | 6 | -4.755378000 | -0.152819000 | -0.603543000 |
| 6 | -3.404678000 | -2.499755000 | 1.169123000  | 6 | -3.687989000 | 2.477287000  | -0.529132000 |
| 6 | -2.270630000 | -3.278331000 | 0.724201000  | 6 | -2.511779000 | 3.251334000  | -0.200414000 |
| 6 | -2.040139000 | -1.623977000 | 3.017173000  | 6 | -2.634233000 | 1.838416000  | -2.656667000 |
| 6 | -0.950092000 | -2.381543000 | 2.592405000  | 6 | -1.505363000 | 2.591600000  | -2.342251000 |
| 6 | -1.067005000 | -3.223884000 | 1.424550000  | 6 | -1.442702000 | 3.312201000  | -1.092416000 |
| 6 | 1.072459000  | -2.282677000 | -1.424343000 | 6 | 1.166835000  | 2.176509000  | 1.256901000  |
| 6 | 0.183996000  | -3.156906000 | -0.698414000 | 6 | 0.145627000  | 3.075212000  | 0.775996000  |
| 6 | 0.183998000  | -3.156747000 | 0.699169000  | 6 | -0.086989000 | 3.219482000  | -0.593097000 |
| 6 | 1.930222000  | -1.421596000 | -0.722848000 | 6 | 1.975481000  | 1.465201000  | 0.343728000  |
| 6 | 1.443883000  | 0.406381000  | -2.302708000 | 6 | 1.752966000  | -0.560321000 | 1.792973000  |
| 6 | 0.552980000  | -0.475967000 | -3.016544000 | 6 | 0.981718000  | 0.208189000  | 2.715933000  |
| 6 | 0.371318000  | -1.793258000 | -2.584968000 | 6 | 0.698304000  | 1.564773000  | 2.461814000  |
| 6 | 2.146958000  | -0.064927000 | -1.183869000 | 6 | 2.317824000  | 0.036238000  | 0.626580000  |
| 6 | 1.684795000  | 2.080542000  | -0.000217000 | 6 | 1.619946000  | -1.977429000 | -0.684309000 |
| 6 | 0.981880000  | 2.539420000  | -1.161807000 | 6 | 1.139829000  | -2.593653000 | 0.532089000  |
| 6 | 0.871566000  | 1.728494000  | -2.303117000 | 6 | 1.192718000  | -1.883597000 | 1.736626000  |
| 6 | 2.328519000  | 0.804315000  | -0.000073000 | 6 | 2.155952000  | -0.681729000 | -0.644620000 |
| 6 | 1.443891000  | 0.406902000  | 2.302653000  | 6 | 0.963668000  | -0.115856000 | -2.740058000 |
| 6 | 0.871571000  | 1.729017000  | 2.302762000  | 6 | 0.421077000  | -1.448601000 | -2.772200000 |
| 6 | 0.981880000  | 2.539681000  | 1.161271000  | 6 | 0.741363000  | -2.360644000 | -1.759726000 |
| 6 | 2.146959000  | -0.064658000 | 1.183917000  | 6 | 1.811559000  | 0.264136000  | -1.683371000 |

|                    |              |              |              |                      |              |              |              |
|--------------------|--------------|--------------|--------------|----------------------|--------------|--------------|--------------|
| 6                  | 1.072463000  | -2.282356000 | 1.424899000  | 6                    | 0.685063000  | 2.453593000  | -1.542016000 |
| 6                  | 0.371326000  | -1.792674000 | 2.585415000  | 6                    | -0.188158000 | 2.055657000  | -2.615449000 |
| 6                  | 0.552990000  | -0.475283000 | 3.016690000  | 6                    | -0.050983000 | 0.795668000  | -3.206374000 |
| 6                  | 1.930226000  | -1.421433000 | 0.723207000  | 6                    | 1.671624000  | 1.572071000  | -1.078974000 |
| $(C_{60})Sc(CO)_4$ |              |              |              | $(C_{60})Ti(CO)_2Cl$ |              |              |              |
| 6                  | 0.705436000  | 1.849894000  | 2.453644000  | 6                    | 2.858817000  | 1.181349000  | -2.737479000 |
| 6                  | 1.447023000  | 2.179632000  | 1.262681000  | 6                    | 3.611406000  | 0.010754000  | -2.347099000 |
| 6                  | 0.759082000  | 0.555866000  | 2.982935000  | 6                    | 2.840081000  | 2.306732000  | -1.912574000 |
| 6                  | 2.222703000  | 1.193610000  | 0.630536000  | 6                    | 4.313797000  | 0.004846000  | -1.142834000 |
| 6                  | 2.220276000  | 1.084277000  | -0.809781000 | 6                    | 4.293710000  | -1.169027000 | -0.298773000 |
| 6                  | 0.645876000  | 3.074197000  | 0.467033000  | 6                    | 2.858413000  | -1.155757000 | -2.748732000 |
| 6                  | 0.644400000  | 2.968836000  | -0.927910000 | 6                    | 2.839243000  | -2.289007000 | -1.934688000 |
| 6                  | 1.443520000  | 1.964114000  | -1.581451000 | 6                    | 3.571974000  | -2.296502000 | -0.688462000 |
| 6                  | -1.655482000 | 0.608695000  | 3.430687000  | 6                    | 0.435403000  | 2.605285000  | -2.336609000 |
| 6                  | -1.712369000 | 1.947214000  | 2.880452000  | 6                    | 0.455562000  | 1.441147000  | -3.190290000 |
| 6                  | -0.443180000 | -0.073963000 | 3.488621000  | 6                    | 1.604354000  | 3.026496000  | -1.705902000 |
| 6                  | -0.554981000 | 2.561494000  | 2.406889000  | 6                    | 1.643624000  | 0.740327000  | -3.383408000 |
| 6                  | -0.591753000 | 3.318414000  | 1.177702000  | 6                    | 1.643357000  | -0.708105000 | -3.390326000 |
| 6                  | -2.952633000 | 2.074906000  | 2.149203000  | 6                    | -0.779810000 | 0.714688000  | -2.982567000 |
| 6                  | -2.988072000 | 2.806808000  | 0.962058000  | 6                    | -0.780048000 | -0.685476000 | -2.989225000 |
| 6                  | -1.784217000 | 3.435152000  | 0.466931000  | 6                    | 0.455047000  | -1.410324000 | -3.203923000 |
| 6                  | -1.544147000 | -2.144257000 | 2.759703000  | 6                    | 0.371820000  | 3.471446000  | 0.378901000  |
| 6                  | -2.805646000 | -1.440045000 | 2.706949000  | 6                    | -0.842092000 | 3.018206000  | -0.268145000 |
| 6                  | -0.385771000 | -1.475687000 | 3.148171000  | 6                    | 1.571992000  | 3.467995000  | -0.326806000 |
| 6                  | -2.860801000 | -0.086156000 | 3.037265000  | 6                    | -0.811824000 | 2.595101000  | -1.601758000 |
| 6                  | -3.662865000 | 0.819344000  | 2.246070000  | 6                    | -1.563440000 | 1.436850000  | -2.015875000 |
| 6                  | -3.552089000 | -1.939208000 | 1.574038000  | 6                    | -1.627751000 | 2.306514000  | 0.704114000  |
| 6                  | -4.323713000 | -1.065230000 | 0.809074000  | 6                    | -2.390734000 | 1.187571000  | 0.309907000  |
| 6                  | -4.380070000 | 0.338635000  | 1.151223000  | 6                    | -2.313242000 | 0.725194000  | -1.064717000 |
| 6                  | 0.883557000  | -2.614126000 | 1.365093000  | 6                    | 2.754377000  | 2.580987000  | 1.637279000  |
| 6                  | -0.320544000 | -3.320061000 | 0.974341000  | 6                    | 1.504903000  | 2.578218000  | 2.364105000  |
| 6                  | 0.852840000  | -1.709417000 | 2.433212000  | 6                    | 2.787937000  | 3.018940000  | 0.313300000  |
| 6                  | -1.510965000 | -3.081944000 | 1.655743000  | 6                    | 0.336482000  | 3.019919000  | 1.748937000  |
| 6                  | -2.752061000 | -2.952785000 | 0.924627000  | 6                    | -0.900957000 | 2.290433000  | 1.945106000  |
| 6                  | -0.322176000 | -3.428892000 | -0.465170000 | 6                    | 1.485137000  | 1.401478000  | 3.210494000  |
| 6                  | -1.514175000 | -3.295965000 | -1.172035000 | 6                    | 0.298153000  | 0.705025000  | 3.414694000  |
| 6                  | -2.753554000 | -3.058019000 | -0.466175000 | 6                    | -0.917949000 | 1.150970000  | 2.761787000  |
| 6                  | 2.299658000  | -0.143228000 | 1.191256000  | 6                    | 4.294129000  | 1.170598000  | -0.287564000 |
| 6                  | 2.342916000  | -1.095298000 | 0.078960000  | 6                    | 4.260889000  | 0.717199000  | 1.085060000  |
| 6                  | 1.557492000  | -0.457148000 | 2.345037000  | 6                    | 3.572841000  | 2.302067000  | -0.666401000 |
| 6                  | 1.620595000  | -2.301157000 | 0.171127000  | 6                    | 3.506567000  | 1.410608000  | 2.030999000  |
| 6                  | 0.881091000  | -2.790548000 | -0.960434000 | 6                    | 2.722240000  | 0.682804000  | 3.001995000  |
| 6                  | 2.295567000  | -0.321158000 | -1.163014000 | 6                    | 4.260610000  | -0.728724000 | 1.078153000  |
| 6                  | 1.551937000  | -0.805240000 | -2.254976000 | 6                    | 3.506016000  | -1.430876000 | 2.017350000  |
| 6                  | 0.847613000  | -2.056814000 | -2.152478000 | 6                    | 2.722001000  | -0.712163000 | 2.995342000  |
| 6                  | -2.811705000 | -1.831229000 | -2.455951000 | 6                    | -0.918351000 | -1.176712000 | 2.750579000  |
| 6                  | -1.550113000 | -2.535757000 | -2.405102000 | 6                    | 0.297891000  | -0.737503000 | 3.407803000  |
| 6                  | -0.392745000 | -1.932756000 | -2.891625000 | 6                    | 1.484628000  | -1.432380000 | 3.196932000  |
| 6                  | -2.867610000 | -0.542035000 | -2.985674000 | 6                    | -0.901787000 | -2.308282000 | 1.922969000  |
| 6                  | -4.382754000 | 0.162064000  | -1.181635000 | 6                    | -2.391288000 | -1.189328000 | 0.298562000  |
| 6                  | -4.325477000 | -1.174460000 | -0.632616000 | 6                    | -2.426261000 | -0.005019000 | 1.179595000  |
| 6                  | -3.555498000 | -2.154023000 | -1.259109000 | 6                    | -1.664843000 | -0.010901000 | 2.374850000  |
| 6                  | -3.668441000 | 0.472349000  | -2.338246000 | 6                    | -1.628603000 | -2.312269000 | 0.681975000  |
| 6                  | -2.990505000 | 2.629911000  | -1.369077000 | 6                    | -0.812796000 | -2.579081000 | -1.626615000 |
| 6                  | -3.734568000 | 2.309777000  | -0.171764000 | 6                    | -1.563994000 | -1.416618000 | -2.029554000 |
| 6                  | -4.416414000 | 1.097004000  | -0.079189000 | 6                    | -2.313552000 | -0.713841000 | -1.071583000 |
| 6                  | -2.957915000 | 1.727834000  | -2.432655000 | 6                    | -0.843142000 | -3.014836000 | -0.297078000 |
| 6                  | -0.561007000 | 2.169574000  | -2.765368000 | 6                    | 1.570748000  | -3.464951000 | -0.360058000 |
| 6                  | -0.594986000 | 3.103472000  | -1.664768000 | 6                    | 1.603255000  | -3.010297000 | -1.734878000 |
| 6                  | -1.785859000 | 3.325962000  | -0.976988000 | 6                    | 0.434443000  | -2.582700000 | -2.361577000 |
| 6                  | -1.719399000 | 1.491672000  | -3.139209000 | 6                    | 0.370576000  | -3.474729000 | 0.345590000  |
| 6                  | -0.451173000 | -0.598185000 | -3.438988000 | 6                    | 1.503946000  | -2.600854000 | 2.339158000  |

|                                     |              |              |              |                                      |              |              |              |
|-------------------------------------|--------------|--------------|--------------|--------------------------------------|--------------|--------------|--------------|
| 6                                   | 0.752188000  | 0.100304000  | -3.036550000 | 6                                    | 2.753415000  | -2.597151000 | 1.612394000  |
| 6                                   | 0.699232000  | 1.458913000  | -2.707436000 | 6                                    | 2.786881000  | -3.022493000 | 0.284312000  |
| 6                                   | -1.663487000 | 0.085614000  | -3.481846000 | 6                                    | 0.335387000  | -3.036308000 | 1.719874000  |
| 21                                  | 4.504957000  | 0.019075000  | -0.002284000 | 22                                   | -4.417363000 | -0.000896000 | 0.295550000  |
| 6                                   | 4.902986000  | -1.698844000 | -1.418376000 | 17                                   | -6.058799000 | -0.008384000 | 1.744315000  |
| 8                                   | 4.935629000  | -2.596162000 | -2.136067000 | 8                                    | -5.467135000 | -2.337384000 | -1.681004000 |
| 6                                   | 5.100658000  | 1.626609000  | 1.483087000  | 8                                    | -5.467133000 | 2.352508000  | -1.660914000 |
| 8                                   | 5.316618000  | 2.447540000  | 2.256909000  | 6                                    | -5.093509000 | -1.494313000 | -0.994767000 |
| 6                                   | 4.902600000  | -1.491853000 | 1.632859000  | 6                                    | -5.093463000 | 1.503653000  | -0.981869000 |
| 8                                   | 4.933564000  | -2.283835000 | 2.465430000  |                                      |              |              |              |
| 6                                   | 5.105323000  | 1.414891000  | -1.686889000 |                                      |              |              |              |
| 8                                   | 5.325891000  | 2.126220000  | -2.561316000 |                                      |              |              |              |
| (C <sub>60</sub> )TiCl <sub>3</sub> |              |              |              | (C <sub>60</sub> )V(CO) <sub>2</sub> |              |              |              |
| 22                                  | 4.472257000  | -0.001078000 | 0.000383000  | 6                                    | 1.192665000  | -2.583309000 | 1.417615000  |
| 17                                  | 5.355541000  | -0.573738000 | 1.909112000  | 6                                    | 1.986620000  | -1.431079000 | 1.745012000  |
| 17                                  | 5.347898000  | -1.370504000 | -1.453058000 | 6                                    | 1.084776000  | -3.021515000 | 0.093297000  |
| 17                                  | 5.332460000  | 1.949915000  | -0.460562000 | 6                                    | 2.700183000  | -0.745073000 | 0.732947000  |
| 6                                   | -1.619106000 | -2.868707000 | 1.980544000  | 6                                    | 2.699879000  | 0.744375000  | 0.733436000  |
| 6                                   | -1.619272000 | -1.815644000 | 2.975384000  | 6                                    | 1.313724000  | -0.702652000 | 2.783227000  |
| 6                                   | -0.435539000 | -3.229110000 | 1.340064000  | 6                                    | 1.313713000  | 0.700543000  | 2.783766000  |
| 6                                   | -0.436354000 | -1.156012000 | 3.299922000  | 6                                    | 1.986650000  | 1.429787000  | 1.746121000  |
| 6                                   | -0.436666000 | 0.276554000  | 3.485367000  | 6                                    | -1.311724000 | -3.466450000 | 0.414963000  |
| 6                                   | -2.850240000 | -1.071424000 | 2.835173000  | 6                                    | -1.196964000 | -3.018863000 | 1.787655000  |
| 6                                   | -2.850378000 | 0.312337000  | 3.014369000  | 6                                    | -0.193603000 | -3.474412000 | -0.415854000 |
| 6                                   | -1.619624000 | 0.996724000  | 3.339850000  | 6                                    | 0.031130000  | -2.592828000 | 2.284664000  |
| 6                                   | -1.620040000 | -3.391247000 | -0.806421000 | 6                                    | 0.104496000  | -1.426558000 | 3.129789000  |
| 6                                   | -2.850571000 | -3.027597000 | -0.141337000 | 6                                    | -2.404725000 | -2.298803000 | 2.124186000  |
| 6                                   | -0.436038000 | -3.495109000 | -0.079522000 | 6                                    | -2.334249000 | -1.170358000 | 2.941025000  |
| 6                                   | -2.850057000 | -2.770416000 | 1.229729000  | 6                                    | -1.055057000 | -0.726343000 | 3.447996000  |
| 6                                   | -3.611975000 | -1.661137000 | 1.757671000  | 6                                    | -1.538302000 | -2.589261000 | -2.272022000 |
| 6                                   | -3.613272000 | -2.185102000 | -1.034892000 | 6                                    | -2.701281000 | -2.588706000 | -1.413419000 |
| 6                                   | -4.344530000 | -1.112543000 | -0.525729000 | 6                                    | -0.310019000 | -3.026284000 | -1.782964000 |
| 6                                   | -4.343733000 | -0.845966000 | 0.895474000  | 6                                    | -2.589848000 | -3.020670000 | -0.091804000 |
| 6                                   | 0.790752000  | -2.366012000 | -1.898127000 | 6                                    | -3.265724000 | -2.299455000 | 0.963671000  |
| 6                                   | -0.438532000 | -2.272955000 | -2.657201000 | 6                                    | -3.491768000 | -1.420314000 | -1.728817000 |
| 6                                   | 0.793627000  | -2.967533000 | -0.632975000 | 6                                    | -4.140209000 | -0.722738000 | -0.710440000 |
| 6                                   | -1.621335000 | -2.770545000 | -2.115338000 | 6                                    | -4.025040000 | -1.170104000 | 0.659735000  |
| 6                                   | -2.852242000 | -2.025660000 | -2.253202000 | 6                                    | 0.828414000  | -1.165149000 | -2.938358000 |
| 6                                   | -0.439230000 | -1.004765000 | -3.348853000 | 6                                    | -0.449453000 | -0.720668000 | -3.454675000 |
| 6                                   | -1.622179000 | -0.280666000 | -3.473228000 | 6                                    | 0.895276000  | -2.295446000 | -2.115208000 |
| 6                                   | -2.852373000 | -0.800462000 | -2.920988000 | 6                                    | -1.608915000 | -1.416852000 | -3.119626000 |
| 6                                   | 2.284464000  | -1.210540000 | 0.226395000  | 6                                    | -2.815116000 | -0.697026000 | -2.781566000 |
| 6                                   | 2.269255000  | -0.587156000 | -1.080787000 | 6                                    | -0.449471000 | 0.723270000  | -3.454122000 |
| 6                                   | 1.552083000  | -2.389921000 | 0.447387000  | 6                                    | -1.608956000 | 1.419183000  | -3.118566000 |
| 6                                   | 1.548065000  | -1.164423000 | -2.137180000 | 6                                    | -2.815136000 | 0.699082000  | -2.781046000 |
| 6                                   | 0.790049000  | -0.315110000 | -3.017123000 | 6                                    | 2.538812000  | -1.177971000 | -0.664456000 |
| 6                                   | 2.275477000  | 0.844187000  | -0.896821000 | 6                                    | 2.433750000  | 0.000598000  | -1.492208000 |
| 6                                   | 1.549277000  | 1.670664000  | -1.769489000 | 6                                    | 1.756903000  | -2.307936000 | -0.963731000 |
| 6                                   | 0.790807000  | 1.074365000  | -2.837686000 | 6                                    | 1.618143000  | 0.001001000  | -2.638927000 |
| 6                                   | 0.792335000  | -1.517502000 | 2.624882000  | 6                                    | 0.828381000  | 1.167379000  | -2.937477000 |
| 6                                   | 1.549788000  | -0.311627000 | 2.412645000  | 6                                    | 2.538490000  | 1.178376000  | -0.663427000 |
| 6                                   | 0.794260000  | -2.536614000 | 1.663741000  | 6                                    | 1.756831000  | 2.308692000  | -0.961969000 |
| 6                                   | 2.269581000  | -0.156361000 | 1.218109000  | 6                                    | 0.895231000  | 2.297073000  | -2.113497000 |
| 6                                   | 2.278974000  | 1.112224000  | 0.528238000  | 6                                    | -2.701322000 | 2.589714000  | -1.411444000 |
| 6                                   | 0.791896000  | 0.798873000  | 2.924989000  | 6                                    | -1.538350000 | 2.590954000  | -2.270064000 |
| 6                                   | 0.793127000  | 2.029390000  | 2.254999000  | 6                                    | -0.310072000 | 3.027630000  | -1.780680000 |
| 6                                   | 1.550821000  | 2.198025000  | 1.042775000  | 6                                    | -2.589913000 | 3.020689000  | -0.089506000 |
| 6                                   | -0.438484000 | 2.874818000  | -1.990089000 | 6                                    | -4.025057000 | 1.169507000  | 0.660624000  |
| 6                                   | 0.791205000  | 2.772504000  | -1.232652000 | 6                                    | -4.140219000 | 0.723192000  | -0.709886000 |
| 6                                   | 0.791980000  | 3.030761000  | 0.143959000  | 6                                    | -3.491791000 | 1.421556000  | -1.727738000 |
| 6                                   | -1.621907000 | 3.217331000  | -1.339551000 | 6                                    | -3.265768000 | 2.298651000  | 0.965417000  |
| 6                                   | -2.852514000 | 1.517561000  | -2.620761000 | 6                                    | -2.334257000 | 1.168053000  | 2.941896000  |



|                   |              |              |              |                   |              |              |              |
|-------------------|--------------|--------------|--------------|-------------------|--------------|--------------|--------------|
| 6                 | -1.62222000  | 1.15622000   | -3.287295000 | 6                 | -3.124084000 | -0.001038000 | 2.628372000  |
| 6                 | -0.439068000 | 1.824849000  | -2.981920000 | 6                 | -3.953289000 | -0.000624000 | 1.506864000  |
| 6                 | -2.852524000 | 2.531768000  | -1.662895000 | 6                 | -2.404755000 | 2.297115000  | 2.125913000  |
| 6                 | -4.344538000 | 1.207841000  | -0.225172000 | 6                 | 0.031097000  | 2.591067000  | 2.286628000  |
| 6                 | -4.344877000 | 0.156971000  | -1.218301000 | 6                 | 0.104475000  | 1.424170000  | 3.130876000  |
| 6                 | -3.614178000 | 0.309731000  | -2.395852000 | 6                 | -1.055069000 | 0.723680000  | 3.448533000  |
| 6                 | -3.613627000 | 2.374761000  | -0.444047000 | 6                 | -1.197008000 | 3.017462000  | 1.789940000  |
| 6                 | -2.850819000 | 2.364672000  | 1.894788000  | 6                 | -0.193674000 | 3.474710000  | -0.413210000 |
| 6                 | -3.612152000 | 1.157019000  | 2.122641000  | 6                 | 1.084699000  | 3.021434000  | 0.095599000  |
| 6                 | -4.343872000 | 0.588029000  | 1.081155000  | 6                 | 1.192641000  | 2.582236000  | 1.419582000  |
| 6                 | -2.851834000 | 2.962929000  | 0.634503000  | 6                 | -1.311789000 | 3.466105000  | 0.417600000  |
| 6                 | -0.437378000 | 3.400425000  | 0.813596000  | 23                | 4.466552000  | -0.000140000 | -0.177592000 |
| 6                 | -0.436840000 | 2.781400000  | 2.118572000  | 6                 | 5.619307000  | 1.570585000  | 0.021482000  |
| 6                 | -1.619799000 | 2.268643000  | 2.645893000  | 8                 | 6.247968000  | 2.529572000  | 0.167828000  |
| 6                 | -1.621230000 | 3.484166000  | 0.083983000  | 6                 | 5.620303000  | -1.570125000 | 0.021546000  |
|                   |              |              |              | 8                 | 6.249737000  | -2.528616000 | 0.167794000  |
| $(C_{60})V(CO)_3$ |              |              |              | $(C_{60})V(CO)_4$ |              |              |              |
| 6                 | 0.897181000  | 3.021387000  | 0.016736000  | 6                 | 0.661846000  | 2.966016000  | -0.737263000 |
| 6                 | 1.523925000  | 2.312430000  | -1.069934000 | 6                 | 1.409588000  | 1.993797000  | -1.490963000 |
| 6                 | 1.063817000  | 2.584247000  | 1.336261000  | 6                 | 0.697710000  | 2.959328000  | 0.663127000  |
| 6                 | 2.309868000  | 1.175522000  | -0.801616000 | 6                 | 2.165048000  | 1.022717000  | -0.808098000 |
| 6                 | 2.178665000  | 0.000815000  | -1.632724000 | 6                 | 2.162498000  | -0.348975000 | -1.259522000 |
| 6                 | 0.613893000  | 2.300144000  | -2.183736000 | 6                 | 0.622097000  | 1.601827000  | -2.630171000 |
| 6                 | 0.509860000  | 1.168843000  | -3.002206000 | 6                 | 0.620454000  | 0.271444000  | -3.068119000 |
| 6                 | 1.310929000  | 0.001297000  | -2.737419000 | 6                 | 1.406490000  | -0.722446000 | -2.385695000 |
| 6                 | -1.307464000 | 3.017568000  | 1.809364000  | 6                 | -1.717091000 | 3.401948000  | 0.752395000  |
| 6                 | -1.482024000 | 3.465813000  | 0.442998000  | 6                 | -1.754736000 | 3.407790000  | -0.695904000 |
| 6                 | -0.058708000 | 2.592570000  | 2.253260000  | 6                 | -0.515097000 | 3.189794000  | 1.422014000  |
| 6                 | -0.401572000 | 3.475689000  | -0.436041000 | 6                 | -0.588830000 | 3.201750000  | -1.429485000 |
| 6                 | -0.576873000 | 3.029471000  | -1.797547000 | 6                 | -0.613525000 | 2.357449000  | -2.600304000 |
| 6                 | -2.780912000 | 3.020198000  | -0.007717000 | 6                 | -2.992421000 | 2.786851000  | -1.110401000 |
| 6                 | -2.949483000 | 2.589340000  | -1.323624000 | 6                 | -3.015752000 | 1.971052000  | -2.241953000 |
| 6                 | -1.824994000 | 2.591455000  | -2.232315000 | 6                 | -1.802602000 | 1.750091000  | -2.995824000 |
| 6                 | -1.094665000 | 0.723434000  | 3.460592000  | 6                 | -1.644631000 | 1.726181000  | 3.037843000  |
| 6                 | -2.394373000 | 1.167797000  | 3.009952000  | 6                 | -2.896197000 | 1.953126000  | 2.350945000  |
| 6                 | 0.050129000  | 1.425233000  | 3.094235000  | 6                 | -0.477739000 | 2.337003000  | 2.585974000  |
| 6                 | -2.499250000 | 2.296610000  | 2.197380000  | 6                 | -2.931878000 | 2.777442000  | 1.226221000  |
| 6                 | -3.410140000 | 2.298365000  | 1.075550000  | 6                 | -3.720656000 | 2.398025000  | 0.076267000  |
| 6                 | -3.197215000 | -0.001284000 | 2.730623000  | 6                 | -3.648602000 | 0.718893000  | 2.367364000  |
| 6                 | -4.074043000 | -0.000810000 | 1.646335000  | 6                 | -4.406435000 | 0.351032000  | 1.256260000  |
| 6                 | -4.182216000 | 1.169415000  | 0.804058000  | 6                 | -4.443123000 | 1.205430000  | 0.090360000  |
| 6                 | 1.240346000  | -0.702013000 | 2.693386000  | 6                 | 0.777967000  | 0.246747000  | 2.970454000  |
| 6                 | 0.050184000  | -1.428000000 | 3.092941000  | 6                 | -0.435581000 | -0.379255000 | 3.455611000  |
| 6                 | 1.240324000  | 0.699658000  | 2.694024000  | 6                 | 0.757913000  | 1.581114000  | 2.543734000  |
| 6                 | -1.094637000 | -0.726580000 | 3.459936000  | 6                 | -1.623104000 | 0.346499000  | 3.479617000  |
| 6                 | -2.394327000 | -1.170586000 | 3.008890000  | 6                 | -2.861473000 | -0.273156000 | 3.063894000  |
| 6                 | -0.058602000 | -2.594580000 | 2.250905000  | 6                 | -0.437234000 | -1.750219000 | 3.004175000  |
| 6                 | -1.307339000 | -3.019221000 | 1.806619000  | 6                 | -1.626214000 | -2.346058000 | 2.593170000  |
| 6                 | -2.499155000 | -2.298665000 | 2.195292000  | 6                 | -2.863080000 | -1.598130000 | 2.627716000  |
| 6                 | 2.506747000  | 0.734493000  | 0.575410000  | 6                 | 2.217993000  | 1.024220000  | 0.640280000  |
| 6                 | 2.506794000  | -0.734875000 | 0.574759000  | 6                 | 2.245881000  | -0.362376000 | 1.088885000  |
| 6                 | 1.867384000  | 1.428069000  | 1.625816000  | 6                 | 1.483473000  | 1.981993000  | 1.367525000  |
| 6                 | 1.867438000  | -1.429429000 | 1.624521000  | 6                 | 1.524907000  | -0.740935000 | 2.239491000  |
| 6                 | 1.063925000  | -2.585375000 | 1.333912000  | 6                 | 0.775215000  | -1.968026000 | 2.240854000  |
| 6                 | 2.309981000  | -1.174673000 | -0.802702000 | 6                 | 2.214564000  | -1.210342000 | -0.095882000 |
| 6                 | 1.524024000  | -2.311347000 | -1.072035000 | 6                 | 1.478611000  | -2.412026000 | -0.080000000 |
| 6                 | 0.897311000  | -3.021319000 | 0.013987000  | 6                 | 0.753007000  | -2.787639000 | 1.104924000  |
| 6                 | -2.780787000 | -3.020258000 | -0.010465000 | 6                 | -2.901813000 | -2.964691000 | 0.731296000  |
| 6                 | -1.481881000 | -3.466233000 | 0.439844000  | 6                 | -1.650272000 | -3.193093000 | 1.417758000  |
| 6                 | -0.401430000 | -3.475261000 | -0.439202000 | 6                 | -0.484265000 | -3.418217000 | 0.690433000  |
| 6                 | -2.949376000 | -2.588212000 | -1.325979000 | 6                 | -2.938367000 | -2.959178000 | -0.663271000 |
| 6                 | -4.356927000 | -0.722759000 | -0.560653000 | 6                 | -4.445482000 | -1.016632000 | -0.641638000 |

|                      |              |              |              |                     |              |              |              |
|----------------------|--------------|--------------|--------------|---------------------|--------------|--------------|--------------|
| 6                    | -4.182167000 | -1.170272000 | 0.802994000  | 6                   | -4.407937000 | -1.022370000 | 0.803704000  |
| 6                    | -3.410042000 | -2.299434000 | 1.073458000  | 6                   | -3.651599000 | -1.980242000 | 1.478162000  |
| 6                    | -3.753153000 | -1.420083000 | -1.606419000 | 6                   | -3.725638000 | -1.968912000 | -1.362052000 |
| 6                    | -3.122862000 | 0.699116000  | -2.686651000 | 6                   | -3.018436000 | -0.248847000 | -2.973164000 |
| 6                    | -3.753215000 | 1.421439000  | -1.605128000 | 6                   | -3.768478000 | 0.737190000  | -2.228672000 |
| 6                    | -4.356957000 | 0.723137000  | -0.559996000 | 6                   | -4.467135000 | 0.360250000  | -1.082581000 |
| 6                    | -3.122833000 | -0.696752000 | -2.687282000 | 6                   | -2.997393000 | -1.577611000 | -2.547740000 |
| 6                    | -0.788802000 | -0.720592000 | -3.462544000 | 6                   | -0.594560000 | -1.726389000 | -3.052522000 |
| 6                    | -0.788833000 | 0.723755000  | -3.461889000 | 6                   | -0.616640000 | -0.351656000 | -3.492297000 |
| 6                    | -1.932660000 | 1.419862000  | -3.076784000 | 6                   | -1.804256000 | 0.374160000  | -3.448869000 |
| 6                    | -1.932600000 | -1.417095000 | -3.078071000 | 6                   | -1.761345000 | -2.325712000 | -2.584269000 |
| 6                    | -0.576747000 | -3.027812000 | -1.800300000 | 6                   | -0.522525000 | -3.411779000 | -0.752518000 |
| 6                    | 0.613991000  | -2.298082000 | -2.185821000 | 6                   | 0.691157000  | -2.777651000 | -1.226643000 |
| 6                    | 0.509910000  | -1.166044000 | -3.003266000 | 6                   | 0.656083000  | -1.950846000 | -2.356681000 |
| 6                    | -1.824886000 | -2.589450000 | -2.234667000 | 6                   | -1.724568000 | -3.182147000 | -1.416339000 |
| 23                   | 4.318871000  | 0.000125000  | -0.461855000 | 23                  | 4.199322000  | 0.005813000  | -0.019817000 |
| 6                    | 5.425202000  | -1.608888000 | -0.568741000 | 6                   | 5.131139000  | -1.520209000 | 0.752693000  |
| 8                    | 6.054860000  | -2.577178000 | -0.602461000 | 8                   | 5.651197000  | -2.439195000 | 1.222005000  |
| 6                    | 5.425507000  | 1.609008000  | -0.568276000 | 6                   | 5.195470000  | 1.527558000  | -0.736934000 |
| 8                    | 6.055097000  | 2.577338000  | -0.602012000 | 8                   | 5.756550000  | 2.442504000  | -1.163640000 |
| 6                    | 5.226838000  | -0.000192000 | 1.232626000  | 6                   | 5.127430000  | 0.738513000  | 1.527271000  |
| 8                    | 5.750770000  | -0.000522000 | 2.266122000  | 8                   | 5.644667000  | 1.177733000  | 2.462607000  |
|                      |              |              |              | 6                   | 5.200157000  | -0.753045000 | -1.518700000 |
|                      |              |              |              | 8                   | 5.764544000  | -1.211571000 | -2.415956000 |
| $(C_{60})Cr(CO)_2Cl$ |              |              |              | $(C_{60})Cr(CO)_2H$ |              |              |              |
| 6                    | 2.651642000  | -1.754418000 | -2.570890000 | 6                   | 2.443137000  | -2.775134000 | 1.424158000  |
| 6                    | 3.377530000  | -2.190965000 | -1.398143000 | 6                   | 3.064349000  | -1.670763000 | 2.121088000  |
| 6                    | 2.768370000  | -0.436236000 | -3.013734000 | 6                   | 2.686801000  | -2.967445000 | 0.064273000  |
| 6                    | 4.189416000  | -1.292070000 | -0.707644000 | 6                   | 3.903556000  | -0.796352000 | 1.431590000  |
| 6                    | 4.187661000  | -1.278940000 | 0.738655000  | 6                   | 3.821264000  | 0.626987000  | 1.672928000  |
| 6                    | 2.533400000  | -3.107397000 | -0.667512000 | 6                   | 2.109893000  | -1.153095000 | 3.074681000  |
| 6                    | 2.531651000  | -3.094750000 | 0.727178000  | 6                   | 2.029099000  | 0.219929000  | 3.306166000  |
| 6                    | 3.374068000  | -2.165254000 | 1.443265000  | 6                   | 2.901692000  | 1.126175000  | 2.594633000  |
| 6                    | 0.353240000  | -0.351282000 | -3.472052000 | 6                   | 0.315569000  | -3.501629000 | -0.311481000 |
| 6                    | 0.232779000  | -1.714074000 | -3.015437000 | 6                   | 0.062250000  | -3.302362000 | 1.095344000  |
| 6                    | 1.596506000  | 0.276617000  | -3.466973000 | 6                   | 1.601331000  | -3.333259000 | -0.817774000 |
| 6                    | 1.360048000  | -2.399985000 | -2.568285000 | 6                   | 1.105335000  | -2.940863000 | 1.945382000  |
| 6                    | 1.286358000  | -3.239325000 | -1.388243000 | 6                   | 0.899049000  | -1.936105000 | 2.968091000  |
| 6                    | -1.015440000 | -1.828659000 | -2.288209000 | 6                   | -1.227597000 | -2.657291000 | 1.226640000  |
| 6                    | -1.079608000 | -2.635858000 | -1.144075000 | 6                   | -1.423794000 | -1.683268000 | 2.212430000  |
| 6                    | 0.088534000  | -3.365730000 | -0.692738000 | 6                   | -0.342936000 | -1.323454000 | 3.107206000  |
| 6                    | 0.590843000  | 2.358652000  | -2.614116000 | 6                   | 0.715132000  | -2.161984000 | -2.797225000 |
| 6                    | -0.699395000 | 1.704871000  | -2.602380000 | 6                   | -0.623028000 | -2.323843000 | -2.268219000 |
| 6                    | 1.717473000  | 1.652656000  | -3.030780000 | 6                   | 1.804127000  | -2.651742000 | -2.079848000 |
| 6                    | -0.820210000 | 0.372152000  | -3.024480000 | 6                   | -0.820149000 | -2.981503000 | -1.047065000 |
| 6                    | -1.668271000 | -0.545794000 | -2.315203000 | 6                   | -1.773396000 | -2.478373000 | -0.096387000 |
| 6                    | -1.424089000 | 2.177383000  | -1.450802000 | 6                   | -1.372927000 | -1.137121000 | -2.587383000 |
| 6                    | -2.221651000 | 1.277245000  | -0.734038000 | 6                   | -2.280589000 | -0.626416000 | -1.644155000 |
| 6                    | -2.389458000 | -0.094256000 | -1.180016000 | 6                   | -2.508164000 | -1.313892000 | -0.394791000 |
| 6                    | 3.032707000  | 2.610138000  | -1.188740000 | 6                   | 3.086036000  | -0.613908000 | -2.580147000 |
| 6                    | 1.862413000  | 3.338505000  | -0.752640000 | 6                   | 1.951553000  | -0.102982000 | -3.315041000 |
| 6                    | 2.963380000  | 1.783893000  | -2.311755000 | 6                   | 3.013184000  | -1.868380000 | -1.972218000 |
| 6                    | 0.664860000  | 3.217749000  | -1.454373000 | 6                   | 0.790157000  | -0.864245000 | -3.426322000 |
| 6                    | -0.582109000 | 3.097992000  | -0.729466000 | 6                   | -0.501511000 | -0.225619000 | -3.283849000 |
| 6                    | 1.860710000  | 3.351575000  | 0.694464000  | 6                   | 1.870549000  | 1.322901000  | -3.074182000 |
| 6                    | 0.661497000  | 3.243467000  | 1.395412000  | 6                   | 0.630075000  | 1.942534000  | -2.948926000 |
| 6                    | -0.583680000 | 3.110577000  | 0.669408000  | 6                   | -0.580468000 | 1.152629000  | -3.049958000 |
| 6                    | 4.309332000  | 0.073994000  | -1.166582000 | 6                   | 4.156418000  | -0.996231000 | 0.022067000  |
| 6                    | 4.382644000  | 0.930730000  | -0.004300000 | 6                   | 4.231078000  | 0.303267000  | -0.607398000 |
| 6                    | 3.614214000  | 0.493714000  | -2.300450000 | 6                   | 3.560713000  | -2.063555000 | -0.649020000 |
| 6                    | 3.758083000  | 2.177271000  | -0.016266000 | 6                   | 3.708115000  | 0.490530000  | -1.886239000 |
| 6                    | 3.029880000  | 2.631088000  | 1.146485000  | 6                   | 2.955139000  | 1.686740000  | -2.190573000 |

|                         |              |              |              |                         |              |              |              |
|-------------------------|--------------|--------------|--------------|-------------------------|--------------|--------------|--------------|
| 6                       | 4.306450000  | 0.095087000  | 1.173024000  | 6                       | 4.024060000  | 1.306633000  | 0.412839000  |
| 6                       | 3.608590000  | 0.535112000  | 2.297561000  | 6                       | 3.301079000  | 2.462148000  | 0.118652000  |
| 6                       | 2.957679000  | 1.825237000  | 2.283920000  | 6                       | 2.754880000  | 2.654561000  | -1.206466000 |
| 6                       | -0.705778000 | 1.751423000  | 2.566810000  | 6                       | -0.917214000 | 2.770888000  | -1.403947000 |
| 6                       | 0.584558000  | 2.405225000  | 2.570031000  | 6                       | 0.421701000  | 2.943897000  | -1.930660000 |
| 6                       | 1.710089000  | 1.706923000  | 3.002299000  | 6                       | 1.463396000  | 3.289424000  | -1.073219000 |
| 6                       | -0.827527000 | 0.426506000  | 3.012541000  | 6                       | -1.160452000 | 2.958998000  | -0.036975000 |
| 6                       | -2.392477000 | -0.073132000 | 1.173172000  | 6                       | -2.667200000 | 1.007686000  | -0.000245000 |
| 6                       | -2.223408000 | 1.290419000  | 0.702629000  | 6                       | -2.392152000 | 0.796348000  | -1.423163000 |
| 6                       | -1.427440000 | 2.203173000  | 1.405149000  | 6                       | -1.533566000 | 1.677427000  | -2.109870000 |
| 6                       | -1.673881000 | -0.504231000 | 2.318077000  | 6                       | -2.038011000 | 2.076544000  | 0.681593000  |
| 6                       | -1.082593000 | -2.614884000 | 1.186111000  | 6                       | -1.563194000 | 0.608326000  | 2.605381000  |
| 6                       | -1.801596000 | -2.197751000 | 0.016282000  | 6                       | -2.181166000 | -0.494539000 | 1.926180000  |
| 6                       | -2.448815000 | -0.946785000 | 0.004067000  | 6                       | -2.744149000 | -0.313825000 | 0.643646000  |
| 6                       | -1.021206000 | -1.787169000 | 2.315846000  | 6                       | -1.490343000 | 1.868276000  | 1.992384000  |
| 6                       | 1.353706000  | -2.353425000 | 2.612078000  | 6                       | 0.810980000  | 2.156759000  | 2.808383000  |
| 6                       | 1.282868000  | -3.213723000 | 1.446950000  | 6                       | 0.736456000  | 0.853803000  | 3.440984000  |
| 6                       | 0.086745000  | -3.352679000 | 0.750887000  | 6                       | -0.426821000 | 0.096497000  | 3.348950000  |
| 6                       | 0.225370000  | -1.659500000 | 3.043906000  | 6                       | -0.279882000 | 2.659749000  | 2.105842000  |
| 6                       | 1.588033000  | 0.339058000  | 3.463104000  | 6                       | 1.209608000  | 3.489066000  | 0.339051000  |
| 6                       | 2.761001000  | -0.381834000 | 3.025592000  | 6                       | 2.345903000  | 2.977651000  | 1.072300000  |
| 6                       | 2.645309000  | -1.707757000 | 2.606224000  | 6                       | 2.149115000  | 2.321570000  | 2.287724000  |
| 6                       | 0.344739000  | -0.288754000 | 3.476019000  | 6                       | -0.076463000 | 3.336554000  | 0.848668000  |
| 24                      | -4.264375000 | 0.204770000  | -0.002281000 | 24                      | -4.377921000 | -0.007478000 | -0.677753000 |
| 17                      | -5.566981000 | 1.923318000  | 0.000949000  | 1                       | -5.160022000 | 1.282114000  | -1.235274000 |
| 8                       | -5.703515000 | -1.619176000 | 1.891850000  | 8                       | -6.073846000 | 1.943823000  | 0.776971000  |
| 8                       | -5.711845000 | -1.624569000 | -1.885743000 | 8                       | -6.217780000 | -1.977353000 | 0.663688000  |
| 6                       | -5.144763000 | -0.911033000 | 1.169710000  | 6                       | -5.429638000 | 1.169020000  | 0.188008000  |
| 6                       | -5.149888000 | -0.914271000 | -1.168243000 | 6                       | -5.517447000 | -1.233409000 | 0.121500000  |
| $(C_{60})Mn(CO)_2NMe_3$ |              |              |              | $(C_{60})Mn(CO)_2PMe_3$ |              |              |              |
| 25                      | -3.963474000 | -0.392835000 | -0.000050000 | 25                      | 3.796033000  | -0.663560000 | -0.000016000 |
| 7                       | -5.357224000 | 1.192095000  | 0.000040000  | 15                      | 5.255106000  | 1.047949000  | -0.000135000 |
| 8                       | -5.362061000 | -1.893357000 | 2.091085000  | 8                       | 5.352223000  | -1.974874000 | -2.112969000 |
| 8                       | -5.361866000 | -1.893091000 | -2.091493000 | 8                       | 5.352148000  | -1.973948000 | 2.113563000  |
| 6                       | -4.824871000 | -1.291123000 | 1.253979000  | 6                       | 4.742903000  | -1.461534000 | -1.265410000 |
| 6                       | -4.824768000 | -1.290953000 | -1.254258000 | 6                       | 4.742957000  | -1.461211000 | 1.265545000  |
| 6                       | -6.761282000 | 0.714080000  | -0.000143000 | 6                       | 7.010213000  | 0.570758000  | -0.000653000 |
| 1                       | -6.946909000 | 0.109317000  | -0.888709000 | 1                       | 7.233798000  | -0.029760000 | 0.884253000  |
| 1                       | -6.947048000 | 0.109043000  | 0.888208000  | 1                       | 7.233388000  | -0.029356000 | -0.885935000 |
| 6                       | -5.161584000 | 2.029067000  | 1.206057000  | 6                       | 5.110638000  | 2.156857000  | -1.441303000 |
| 1                       | -4.156270000 | 2.455639000  | 1.205154000  | 1                       | 4.113972000  | 2.604669000  | -1.479191000 |
| 1                       | -5.890847000 | 2.848871000  | 1.226204000  | 1                       | 5.852384000  | 2.959229000  | -1.394205000 |
| 6                       | -5.161387000 | 2.029409000  | -1.205706000 | 6                       | 5.111347000  | 2.156274000  | 1.441552000  |
| 1                       | -5.890688000 | 2.849181000  | -1.225769000 | 1                       | 5.852982000  | 2.958743000  | 1.394358000  |
| 1                       | -5.292605000 | 1.419218000  | -2.101935000 | 1                       | 5.269291000  | 1.587809000  | 2.361551000  |
| 1                       | -4.156096000 | 2.456034000  | -1.204485000 | 1                       | 4.114656000  | 2.603967000  | 1.480199000  |
| 1                       | -7.450627000 | 1.567392000  | -0.000065000 | 1                       | 7.658462000  | 1.451059000  | -0.000598000 |
| 1                       | -5.293012000 | 1.418635000  | 2.102092000  | 1                       | 5.268000000  | 1.588753000  | -2.361624000 |
| 6                       | 3.733028000  | 2.041389000  | -1.420673000 | 6                       | -3.640518000 | 2.268685000  | 1.421239000  |
| 6                       | 2.984559000  | 1.638340000  | -2.590524000 | 6                       | -2.931698000 | 1.797807000  | 2.590079000  |
| 6                       | 4.492726000  | 1.103299000  | -0.722708000 | 6                       | -4.483355000 | 1.404401000  | 0.723110000  |
| 6                       | 3.024929000  | 0.312966000  | -3.021887000 | 6                       | -3.093434000 | 0.481550000  | 3.021012000  |
| 6                       | 1.813116000  | -0.336764000 | -3.468396000 | 6                       | -1.945955000 | -0.276213000 | 3.467186000  |
| 6                       | 1.730978000  | 2.358932000  | -2.590883000 | 6                       | -1.617273000 | 2.400413000  | 2.591163000  |
| 6                       | 0.566005000  | 1.734639000  | -3.029044000 | 6                       | -0.514586000 | 1.672219000  | 3.029243000  |
| 6                       | 0.607082000  | 0.361466000  | -3.475310000 | 6                       | -0.682018000 | 0.308659000  | 3.474892000  |
| 6                       | 3.733062000  | 2.040838000  | 1.421415000  | 6                       | -3.640481000 | 2.269035000  | -1.420746000 |
| 6                       | 2.940969000  | 3.009172000  | 0.698604000  | 6                       | -2.762776000 | 3.160465000  | -0.697365000 |
| 6                       | 4.492743000  | 1.103020000  | 0.723068000  | 6                       | -4.483334000 | 1.404578000  | -0.722853000 |
| 6                       | 2.940952000  | 3.009442000  | -0.697466000 | 6                       | -2.762793000 | 3.160291000  | 0.698101000  |
| 6                       | 1.704274000  | 3.207919000  | -1.417521000 | 6                       | -1.512438000 | 3.243668000  | 1.418211000  |
| 6                       | 1.704309000  | 3.207371000  | 1.418769000  | 6                       | -1.512401000 | 3.244018000  | -1.417418000 |

|                    |              |              |              |                      |              |              |              |
|--------------------|--------------|--------------|--------------|----------------------|--------------|--------------|--------------|
| 6                  | 0.513848000  | 3.409258000  | 0.722712000  | 6                    | -0.309197000 | 3.335395000  | -0.721085000 |
| 6                  | 0.513831000  | 3.409536000  | -0.721355000 | 6                    | -0.309215000 | 3.335217000  | 0.721936000  |
| 6                  | 3.815681000  | -0.660368000 | 2.299525000  | 6                    | -3.969612000 | -0.413260000 | -2.299217000 |
| 6                  | 3.025006000  | 0.311794000  | 3.021981000  | 6                    | -3.093349000 | 0.482297000  | -3.020946000 |
| 6                  | 4.534637000  | -0.271740000 | 1.169845000  | 6                    | -4.650817000 | 0.039498000  | -1.169918000 |
| 6                  | 2.984622000  | 1.637334000  | 2.591128000  | 6                    | -2.931628000 | 1.798447000  | -2.589683000 |
| 6                  | 1.731041000  | 2.357923000  | 2.591796000  | 6                    | -1.617203000 | 2.401054000  | -2.590581000 |
| 6                  | 1.813203000  | -0.338109000 | 3.468267000  | 6                    | -1.945855000 | -0.275355000 | -3.467275000 |
| 6                  | 0.607169000  | 0.360120000  | 3.475482000  | 6                    | -0.681919000 | 0.309517000  | -3.474798000 |
| 6                  | 0.566080000  | 1.733464000  | 3.029749000  | 6                    | -0.514503000 | 1.672968000  | -3.028809000 |
| 6                  | 3.860987000  | -2.328157000 | -0.000475000 | 6                    | -4.169525000 | -2.070804000 | -0.000296000 |
| 6                  | 3.111669000  | -2.728563000 | 1.168699000  | 6                    | -3.459640000 | -2.538274000 | -1.169191000 |
| 6                  | 4.559021000  | -1.120930000 | -0.000249000 | 6                    | -4.753310000 | -0.804049000 | -0.000148000 |
| 6                  | 3.091295000  | -1.910952000 | 2.298919000  | 6                    | -3.362816000 | -1.725084000 | -2.298586000 |
| 6                  | 1.853940000  | -1.713730000 | 3.019346000  | 6                    | -2.112223000 | -1.642020000 | -3.018614000 |
| 6                  | 1.898727000  | -3.377570000 | 0.724370000  | 6                    | -2.311473000 | -3.296734000 | -0.725105000 |
| 6                  | 0.710581000  | -3.194591000 | 1.424483000  | 6                    | -1.111178000 | -3.222939000 | -1.425505000 |
| 6                  | 0.688862000  | -2.346619000 | 2.591628000  | 6                    | -1.010294000 | -2.379868000 | -2.592062000 |
| 6                  | 3.815624000  | -0.659477000 | -2.299829000 | 6                    | -3.969679000 | -0.413828000 | 2.299040000  |
| 6                  | 3.091237000  | -1.910058000 | -2.299687000 | 6                    | -3.362885000 | -1.725654000 | 2.298103000  |
| 6                  | 4.534607000  | -0.271287000 | -1.170015000 | 6                    | -4.650852000 | 0.039209000  | 1.169834000  |
| 6                  | 3.111639000  | -2.728107000 | -1.169785000 | 6                    | -3.459674000 | -2.538563000 | 1.168504000  |
| 6                  | 1.898709000  | -3.377290000 | -0.725677000 | 6                    | -2.311494000 | -3.296915000 | 0.724263000  |
| 6                  | 1.853863000  | -1.712558000 | -3.020006000 | 6                    | -2.112312000 | -1.642767000 | 3.018188000  |
| 6                  | 0.688798000  | -2.345611000 | -2.592501000 | 6                    | -1.010370000 | -2.380508000 | 2.591482000  |
| 6                  | 0.710545000  | -3.194039000 | -1.425690000 | 6                    | -1.111220000 | -3.223292000 | 1.424714000  |
| 6                  | -1.318261000 | -2.039882000 | 1.428459000  | 6                    | 1.015771000  | -2.257296000 | -1.428556000 |
| 6                  | -0.532464000 | -2.993002000 | 0.701804000  | 6                    | 0.143962000  | -3.136346000 | -0.701831000 |
| 6                  | -0.532481000 | -2.992728000 | -0.702900000 | 6                    | 0.143941000  | -3.136524000 | 0.701097000  |
| 6                  | -2.110877000 | -1.096739000 | 0.733941000  | 6                    | 1.877282000  | -1.385784000 | -0.728839000 |
| 6                  | -1.390601000 | 0.685248000  | 2.309123000  | 6                    | 1.338001000  | 0.448821000  | -2.310897000 |
| 6                  | -0.602732000 | -0.291925000 | 3.021989000  | 6                    | 0.463439000  | -0.450583000 | -3.020598000 |
| 6                  | -0.561703000 | -1.618434000 | 2.581971000  | 6                    | 0.302470000  | -1.769520000 | -2.582944000 |
| 6                  | -2.118841000 | 0.293181000  | 1.175815000  | 6                    | 2.028068000  | -0.010635000 | -1.177240000 |
| 6                  | -1.447212000 | 2.363555000  | 0.000502000  | 6                    | 1.552695000  | 2.117853000  | 0.000305000  |
| 6                  | -0.696719000 | 2.751423000  | 1.167769000  | 6                    | 0.837360000  | 2.568718000  | -1.165346000 |
| 6                  | -0.671863000 | 1.930862000  | 2.302639000  | 6                    | 0.737143000  | 1.755247000  | -2.302220000 |
| 6                  | -2.130522000 | 1.132572000  | 0.000271000  | 6                    | 2.134794000  | 0.830487000  | 0.000151000  |
| 6                  | -1.390654000 | 0.686139000  | -2.308771000 | 6                    | 1.337941000  | 0.448255000  | 2.311083000  |
| 6                  | -0.671918000 | 1.931755000  | -2.301824000 | 6                    | 0.737086000  | 1.754679000  | 2.302714000  |
| 6                  | -0.696746000 | 2.751873000  | -1.166634000 | 6                    | 0.837336000  | 2.568437000  | 1.166043000  |
| 6                  | -2.118877000 | 0.293638000  | -1.175602000 | 6                    | 2.028029000  | -0.010929000 | 1.177324000  |
| 6                  | -1.318297000 | -2.039330000 | -1.429167000 | 6                    | 1.015722000  | -2.257643000 | 1.428060000  |
| 6                  | -0.561769000 | -1.617432000 | -2.582531000 | 6                    | 0.302391000  | -1.770155000 | 2.582553000  |
| 6                  | -0.602811000 | -0.290754000 | -3.022042000 | 6                    | 0.463351000  | -0.451328000 | 3.020532000  |
| 6                  | -2.110893000 | -1.096456000 | -0.734257000 | 6                    | 1.877247000  | -1.385961000 | 0.728589000  |
| $(C_{60})Mn(CO)_3$ |              |              |              | $(C_{60})Fe(CO)_2Cl$ |              |              |              |
| 25                 | 4.230551000  | 0.002095000  | -0.003117000 | 6                    | -2.710630000 | -1.167091000 | -2.856600000 |
| 6                  | 5.235479000  | 1.439362000  | -0.387520000 | 6                    | -3.484740000 | 0.001704000  | -2.504911000 |
| 8                  | 5.849353000  | 2.384804000  | -0.638174000 | 6                    | -2.740867000 | -2.297482000 | -2.038587000 |
| 6                  | 5.240380000  | -0.381596000 | 1.430161000  | 6                    | -4.256422000 | 0.000944000  | -1.343951000 |
| 8                  | 5.860154000  | -0.635488000 | 2.370762000  | 6                    | -4.285955000 | 1.170307000  | -0.493697000 |
| 6                  | 5.239839000  | -1.055788000 | -1.044914000 | 6                    | -2.710594000 | 1.170940000  | -2.855041000 |
| 8                  | 5.857822000  | -1.754292000 | -1.725798000 | 6                    | -2.740793000 | 2.300242000  | -2.035524000 |
| 6                  | 2.369976000  | -0.540388000 | -1.110895000 | 6                    | -3.544045000 | 2.300466000  | -0.834400000 |
| 6                  | 2.371537000  | 0.887595000  | -0.865701000 | 6                    | -0.316103000 | -2.593744000 | -2.323790000 |
| 6                  | 2.376478000  | 1.096903000  | 0.572003000  | 6                    | -0.285469000 | -1.425883000 | -3.170720000 |
| 6                  | 2.371787000  | -0.206867000 | 1.206935000  | 6                    | -1.518989000 | -3.018536000 | -1.764260000 |
| 6                  | 2.378181000  | -1.222380000 | 0.170841000  | 6                    | -1.459111000 | -0.723192000 | -3.425959000 |
| 6                  | 1.635216000  | -2.406120000 | 0.343382000  | 6                    | -1.459090000 | 0.727757000  | -3.424989000 |
| 6                  | 0.875765000  | -2.934288000 | -0.759455000 | 6                    | 0.938890000  | -0.701293000 | -2.886956000 |
| 6                  | 0.872777000  | -2.276951000 | -1.996229000 |                      |              |              |              |

|                      |              |              |              |                     |              |              |              |
|----------------------|--------------|--------------|--------------|---------------------|--------------|--------------|--------------|
| 6                    | 1.635700000  | -1.070407000 | -2.191548000 | 6                   | 0.938906000  | 0.705063000  | -2.886015000 |
| 6                    | 0.874104000  | -0.186263000 | -3.029149000 | 6                   | -0.285428000 | 1.430071000  | -3.168817000 |
| 6                    | 0.873431000  | 1.196128000  | -2.791366000 | 6                   | -0.407715000 | -3.477028000 | 0.386080000  |
| 6                    | 1.632511000  | 1.746738000  | -1.703763000 | 6                   | 0.841366000  | -3.021230000 | -0.186525000 |
| 6                    | 0.869228000  | 2.817760000  | -1.114773000 | 6                   | -1.565839000 | -3.467958000 | -0.388330000 |
| 6                    | 0.871239000  | 3.018841000  | 0.270999000  | 6                   | 0.885499000  | -2.585751000 | -1.516721000 |
| 6                    | 1.634229000  | 2.154175000  | 1.134150000  | 6                   | 1.662668000  | -1.430895000 | -1.888395000 |
| 6                    | 0.880096000  | 1.933561000  | 2.336658000  | 6                   | 1.567154000  | -2.314080000 | 0.840038000  |
| 6                    | 0.881707000  | 0.673354000  | 2.951524000  | 6                   | 2.317343000  | -1.173823000 | 0.497484000  |
| 6                    | 1.644125000  | -0.412585000 | 2.397865000  | 6                   | 2.372197000  | -0.727305000 | -0.888163000 |
| 6                    | 0.881411000  | -1.623228000 | 2.552702000  | 6                   | -2.860426000 | -2.591168000 | 1.507547000  |
| 6                    | 0.880994000  | -2.603597000 | 1.551150000  | 6                   | -1.655547000 | -2.593416000 | 2.307060000  |
| 6                    | -0.350737000 | -3.282722000 | 1.200403000  | 6                   | -2.817048000 | -3.022501000 | 0.182199000  |
| 6                    | -0.353241000 | -3.488025000 | -0.228647000 | 6                   | -0.453683000 | -3.031921000 | 1.758927000  |
| 6                    | -1.537357000 | -3.354812000 | -0.949077000 | 6                   | 0.770279000  | -2.305373000 | 2.034792000  |
| 6                    | -1.539325000 | -2.677476000 | -2.229426000 | 6                   | -1.683603000 | -1.420288000 | 3.156907000  |
| 6                    | -0.357551000 | -2.155563000 | -2.750243000 | 6                   | -0.509094000 | -0.724339000 | 3.434640000  |
| 6                    | -0.358658000 | -0.860949000 | -3.387938000 | 6                   | 0.740828000  | -1.168623000 | 2.855430000  |
| 6                    | -1.541673000 | -0.133379000 | -3.480059000 | 6                   | -4.285992000 | -1.169550000 | -0.495257000 |
| 6                    | -1.542726000 | 1.295063000  | -3.233646000 | 6                   | -4.332084000 | -0.723380000 | 0.879201000  |
| 6                    | -0.360515000 | 1.950534000  | -2.902043000 | 6                   | -3.544119000 | -2.299277000 | -0.837464000 |
| 6                    | -0.360921000 | 2.955661000  | -1.866195000 | 6                   | -3.633670000 | -1.422330000 | 1.862967000  |
| 6                    | -1.543226000 | 3.270644000  | -1.200438000 | 6                   | -2.904761000 | -0.700323000 | 2.880194000  |
| 6                    | -1.541576000 | 3.477739000  | 0.233077000  | 6                   | -4.332060000 | 0.722311000  | 0.880165000  |
| 6                    | -0.357277000 | 3.362235000  | 0.956860000  | 6                   | -3.633624000 | 1.419928000  | 1.864859000  |
| 6                    | -0.353507000 | 2.689236000  | 2.233926000  | 6                   | -2.904741000 | 0.696545000  | 2.881126000  |
| 6                    | -1.534645000 | 2.154363000  | 2.739824000  | 6                   | 0.740862000  | 1.164760000  | 2.856979000  |
| 6                    | -1.531636000 | 0.853237000  | 3.377997000  | 6                   | -0.509072000 | 0.719749000  | 3.435603000  |
| 6                    | -0.348401000 | 0.128338000  | 3.491238000  | 6                   | -1.683561000 | 1.416103000  | 3.158798000  |
| 6                    | -0.347958000 | -1.293618000 | 3.245149000  | 6                   | 0.770351000  | 2.302600000  | 2.037855000  |
| 6                    | -1.530650000 | -1.940239000 | 2.894867000  | 6                   | 2.317391000  | 1.173052000  | 0.499048000  |
| 6                    | -1.532506000 | -2.951346000 | 1.857055000  | 6                   | 2.259276000  | -0.000944000 | 1.334281000  |
| 6                    | -2.765328000 | -2.821936000 | 1.112657000  | 6                   | 1.514868000  | -0.001723000 | 2.522473000  |
| 6                    | -2.768010000 | -3.020979000 | -0.267712000 | 6                   | 1.567228000  | 2.312874000  | 0.843112000  |
| 6                    | -3.531590000 | -2.140887000 | -1.123822000 | 6                   | 0.885579000  | 2.587699000  | -1.513280000 |
| 6                    | -2.771320000 | -1.929139000 | -2.334527000 | 6                   | 1.662711000  | 1.433317000  | -1.886490000 |
| 6                    | -2.771645000 | -0.676503000 | -2.949202000 | 6                   | 2.372195000  | 0.728362000  | -0.887190000 |
| 6                    | -3.533808000 | 0.409835000  | -2.377071000 | 6                   | 0.841465000  | 3.021414000  | -0.182506000 |
| 6                    | -2.773256000 | 1.626728000  | -2.551081000 | 6                   | -1.565727000 | 3.468487000  | -0.383714000 |
| 6                    | -2.774356000 | 2.599782000  | -1.551404000 | 6                   | -1.518893000 | 3.020896000  | -1.760242000 |
| 6                    | -3.534164000 | 2.390516000  | -0.339694000 | 6                   | -0.316021000 | 2.596810000  | -2.320341000 |
| 6                    | -2.771689000 | 2.933299000  | 0.762375000  | 6                   | -0.407603000 | 3.476490000  | 0.390706000  |
| 6                    | -2.767428000 | 2.281333000  | 1.995306000  | 6                   | -1.655464000 | 2.590355000  | 2.310506000  |
| 6                    | -3.527321000 | 1.064102000  | 2.172726000  | 6                   | -2.860346000 | 2.589218000  | 1.510996000  |
| 6                    | -2.762860000 | 0.182996000  | 3.025642000  | 6                   | -2.816953000 | 3.022313000  | 0.186223000  |
| 6                    | -2.762628000 | -1.192124000 | 2.788259000  | 6                   | -0.453586000 | 3.029551000  | 1.762957000  |
| 6                    | -3.526564000 | -1.736119000 | 1.688715000  | 26                  | 4.170556000  | 0.000013000  | -0.046765000 |
| 6                    | -4.260215000 | -0.885206000 | 0.862796000  | 17                  | 5.412558000  | -0.000793000 | 1.794403000  |
| 6                    | -4.262573000 | -1.091182000 | -0.568670000 | 8                   | 5.784891000  | 2.117663000  | -1.223618000 |
| 6                    | -4.263782000 | 0.206632000  | -1.206504000 | 8                   | 5.785201000  | -2.116473000 | -1.225325000 |
| 6                    | -4.263400000 | 1.214330000  | -0.169693000 | 6                   | 5.153766000  | 1.276415000  | -0.762704000 |
| 6                    | -4.260567000 | 0.539549000  | 1.109096000  | 6                   | 5.153865000  | -1.275692000 | -0.763851000 |
| $(C_{60})Fe(CO)_2Br$ |              |              |              | $(C_{60})CoCONMe_3$ |              |              |              |
| 6                    | -3.150493000 | -2.704772000 | 1.168043000  | 27                  | -3.976614000 | 0.419537000  | -0.000034000 |
| 6                    | -3.895398000 | -2.295109000 | -0.000726000 | 7                   | -5.476278000 | -0.910893000 | -0.000018000 |
| 6                    | -3.118081000 | -1.886750000 | 2.298242000  | 8                   | -5.608660000 | 2.795410000  | -0.000016000 |
| 6                    | -4.576285000 | -1.078715000 | -0.000380000 | 6                   | -4.977786000 | 1.824322000  | -0.000029000 |
| 6                    | -4.540864000 | -0.229208000 | -1.170165000 | 6                   | -6.841827000 | -0.330160000 | -0.000358000 |
| 6                    | -3.150453000 | -2.704085000 | -1.169710000 | 1                   | -6.981128000 | 0.286582000  | 0.888473000  |
| 6                    | -3.118001000 | -1.885397000 | -2.299426000 | 1                   | -6.980817000 | 0.286269000  | -0.889455000 |
| 6                    | -3.827230000 | -0.626251000 | -2.300204000 | 6                   | -5.339214000 | -1.757986000 | -1.210329000 |
| 6                    | -0.722192000 | -2.356422000 | 2.594693000  | 1                   | -4.375733000 | -2.270177000 | -1.198317000 |

|    |              |              |              |   |              |              |              |
|----|--------------|--------------|--------------|---|--------------|--------------|--------------|
| 6  | -0.756567000 | -3.203686000 | 1.427052000  | 1 | -6.141194000 | -2.506318000 | -1.238805000 |
| 6  | -1.878822000 | -1.706459000 | 3.019323000  | 6 | -5.339563000 | -1.757436000 | 1.210718000  |
| 6  | -1.946308000 | -3.368638000 | 0.724393000  | 1 | -6.141524000 | -2.505786000 | 1.239285000  |
| 6  | -1.946282000 | -3.368209000 | -0.726409000 | 1 | -5.404268000 | -1.131447000 | 2.102446000  |
| 6  | 0.485695000  | -3.014726000 | 0.702155000  | 1 | -4.376056000 | -2.269593000 | 1.199233000  |
| 6  | 0.485718000  | -3.014310000 | -0.703878000 | 1 | -7.588256000 | -1.133271000 | -0.000343000 |
| 6  | -0.756518000 | -3.202844000 | -1.428930000 | 1 | -5.403620000 | -1.132399000 | -2.102362000 |
| 6  | -0.605984000 | 0.352709000  | 3.476508000  | 6 | 3.508959000  | -2.119861000 | 1.421627000  |
| 6  | 0.595505000  | -0.314078000 | 3.021013000  | 6 | 2.776380000  | -1.692017000 | 2.592378000  |
| 6  | -1.820188000 | -0.330900000 | 3.467812000  | 6 | 4.299476000  | -1.207936000 | 0.723052000  |
| 6  | 0.537687000  | -1.644016000 | 2.586507000  | 6 | 2.860231000  | -0.368824000 | 3.022682000  |
| 6  | 1.284219000  | -2.074743000 | 1.431514000  | 6 | 1.671338000  | 0.321833000  | 3.471498000  |
| 6  | 1.398615000  | 0.653760000  | 2.314592000  | 6 | 1.498689000  | -2.369959000 | 2.591027000  |
| 6  | 2.118634000  | 0.253678000  | 1.173865000  | 6 | 0.355785000  | -1.708309000 | 3.030561000  |
| 6  | 2.067289000  | -1.131754000 | 0.727511000  | 6 | 0.443016000  | -0.337157000 | 3.478241000  |
| 6  | -2.965798000 | 1.658455000  | 2.590681000  | 6 | 3.508924000  | -2.120626000 | -1.420544000 |
| 6  | -1.703275000 | 2.363215000  | 2.592591000  | 6 | 2.684140000  | -3.061680000 | -0.697722000 |
| 6  | -3.023949000 | 0.333666000  | 3.022067000  | 6 | 4.299457000  | -1.208323000 | -0.722480000 |
| 6  | -0.546739000 | 1.724883000  | 3.031299000  | 6 | 2.684155000  | -3.061303000 | 0.699332000  |
| 6  | 0.694758000  | 1.905994000  | 2.304720000  | 6 | 1.442828000  | -3.219505000 | 1.418643000  |
| 6  | -1.666306000 | 3.212402000  | 1.419215000  | 6 | 1.442794000  | -3.220265000 | -1.416911000 |
| 6  | -0.474008000 | 3.398918000  | 0.723023000  | 6 | 0.245114000  | -3.380553000 | -0.721006000 |
| 6  | 0.727986000  | 2.725617000  | 1.167422000  | 6 | 0.245131000  | -3.380166000 | 0.722854000  |
| 6  | -4.540905000 | -0.229896000 | 1.169906000  | 6 | 3.681417000  | 0.575917000  | -2.300370000 |
| 6  | -4.481812000 | 1.144027000  | 0.723177000  | 6 | 2.860157000  | -0.370454000 | -3.022527000 |
| 6  | -3.827309000 | -0.627604000 | 2.299736000  | 6 | 4.386014000  | 0.164545000  | -1.169831000 |
| 6  | -3.709749000 | 2.071689000  | 1.421584000  | 6 | 2.776317000  | -1.693416000 | -2.591510000 |
| 6  | -2.904941000 | 3.029288000  | 0.699170000  | 6 | 1.498626000  | -2.371356000 | -2.589760000 |
| 6  | -4.481787000 | 1.144452000  | -0.722626000 | 6 | 1.671255000  | 0.319962000  | -3.471691000 |
| 6  | -3.709700000 | 2.072525000  | -1.420460000 | 6 | 0.442931000  | -0.339031000 | -3.478042000 |
| 6  | -2.904917000 | 3.029699000  | -0.697455000 | 6 | 0.355711000  | -1.709940000 | -3.029621000 |
| 6  | 0.728023000  | 2.726299000  | -1.165758000 | 6 | 3.779114000  | 2.241983000  | -0.000636000 |
| 6  | -0.473984000 | 3.399343000  | -0.721007000 | 6 | 3.043946000  | 2.666827000  | -1.170331000 |
| 6  | -1.666258000 | 3.213236000  | -1.417349000 | 6 | 4.438260000  | 1.013147000  | -0.000312000 |
| 6  | 0.694834000  | 1.907345000  | -2.303537000 | 6 | 2.996159000  | 1.848570000  | -2.299942000 |
| 6  | 2.118678000  | 0.254366000  | -1.173607000 | 6 | 1.755343000  | 1.692625000  | -3.024417000 |
| 6  | 2.127715000  | 1.092620000  | 0.000377000  | 6 | 1.851588000  | 3.350460000  | -0.726364000 |
| 6  | 1.473725000  | 2.333536000  | 0.000731000  | 6 | 0.657960000  | 3.205868000  | -1.426989000 |
| 6  | 1.398690000  | 0.655116000  | -2.314121000 | 6 | 0.608913000  | 2.361789000  | -2.596817000 |
| 6  | 0.537775000  | -1.642493000 | -2.587421000 | 6 | 3.681470000  | 0.577157000  | 2.299995000  |
| 6  | 1.284268000  | -2.073900000 | -1.432657000 | 6 | 2.996213000  | 1.849813000  | 2.298900000  |
| 6  | 2.067304000  | -1.131324000 | -0.728065000 | 6 | 4.386044000  | 0.165176000  | 1.169664000  |
| 6  | 0.595610000  | -0.312302000 | -3.021145000 | 6 | 3.043972000  | 2.667459000  | 1.168845000  |
| 6  | -1.820068000 | -0.328860000 | -3.468037000 | 6 | 1.851605000  | 3.350853000  | 0.724539000  |
| 6  | -1.878717000 | -1.704683000 | -3.020359000 | 6 | 1.755415000  | 1.694257000  | 3.023487000  |
| 6  | -0.722102000 | -2.354895000 | -2.596071000 | 6 | 0.608974000  | 2.363191000  | 2.595557000  |
| 6  | -0.605865000 | 0.354752000  | -3.476287000 | 6 | 0.657991000  | 3.206637000  | 1.425269000  |
| 6  | -1.703187000 | 2.364739000  | -2.591226000 | 6 | -1.408804000 | 2.124083000  | -1.434514000 |
| 6  | -2.965710000 | 1.659979000  | -2.589775000 | 6 | -0.590697000 | 3.045301000  | -0.705546000 |
| 6  | -3.023844000 | 0.335444000  | -3.021941000 | 6 | -0.590684000 | 3.045686000  | 0.703949000  |
| 6  | -0.546636000 | 1.726663000  | -3.030267000 | 6 | -2.211281000 | 1.195304000  | -0.734576000 |
| 26 | 3.922350000  | -0.419018000 | -0.000069000 | 6 | -1.566122000 | -0.600109000 | -2.317132000 |
| 35 | 5.391873000  | 1.397754000  | 0.000196000  | 6 | -0.743653000 | 0.353902000  | -3.026890000 |
| 8  | 5.461438000  | -1.690472000 | -2.117799000 | 6 | -0.665563000 | 1.679074000  | -2.594570000 |
| 8  | 5.460967000  | -1.691282000 | 2.117526000  | 6 | -2.264581000 | -0.180031000 | -1.181354000 |
| 6  | 4.860892000  | -1.189909000 | -1.275645000 | 6 | -1.683390000 | -2.277053000 | 0.000649000  |
| 6  | 4.860960000  | -1.190293000 | 1.275243000  | 6 | -0.946762000 | -2.690344000 | -1.166305000 |
|    |              |              |              | 6 | -0.888260000 | -1.865567000 | -2.300868000 |
|    |              |              |              | 6 | -2.338219000 | -1.020342000 | 0.000317000  |
|    |              |              |              | 6 | -1.566068000 | -0.598864000 | 2.317522000  |
|    |              |              |              | 6 | -0.888203000 | -1.864330000 | 2.301923000  |
|    |              |              |              | 6 | -0.946736000 | -2.689722000 | 1.167813000  |
|    |              |              |              | 6 | -2.264552000 | -0.179400000 | 1.181535000  |
|    |              |              |              | 6 | -1.408771000 | 2.124855000  | 1.433429000  |

|                                            |              |              |              |             |
|--------------------------------------------|--------------|--------------|--------------|-------------|
|                                            | 6            | -0.665503000 | 1.680476000  | 2.593708000 |
|                                            | 6            | -0.743578000 | 0.355531000  | 3.026736000 |
|                                            | 6            | -2.211265000 | 1.195694000  | 0.734009000 |
| <b>(C<sub>60</sub>)CoCOPeT<sub>3</sub></b> |              |              |              |             |
| 27                                         | 3.494777000  | 0.803924000  | -0.144018000 |             |
| 8                                          | 5.206974000  | 3.114669000  | -0.113503000 |             |
| 6                                          | 4.530235000  | 2.173178000  | -0.156717000 |             |
| 6                                          | -3.754550000 | -2.389172000 | -1.283645000 |             |
| 6                                          | -3.099717000 | -1.928610000 | -2.487293000 |             |
| 6                                          | -4.610500000 | -1.536396000 | -0.587479000 |             |
| 6                                          | -3.325448000 | -0.634251000 | -2.953118000 |             |
| 6                                          | -2.222803000 | 0.154432000  | -3.458083000 |             |
| 6                                          | -1.762099000 | -2.477894000 | -2.506548000 |             |
| 6                                          | -0.702957000 | -1.721372000 | -3.000283000 |             |
| 6                                          | -0.937093000 | -0.380685000 | -3.484456000 |             |
| 6                                          | -3.673553000 | -2.298848000 | 1.555646000  |             |
| 6                                          | -2.781639000 | -3.178742000 | 0.834688000  |             |
| 6                                          | -4.569372000 | -1.490584000 | 0.856649000  |             |
| 6                                          | -2.821666000 | -3.223335000 | -0.560239000 |             |
| 6                                          | -1.590405000 | -3.280890000 | -1.313133000 |             |
| 6                                          | -1.509658000 | -3.190593000 | 1.518937000  |             |
| 6                                          | -0.323148000 | -3.255028000 | 0.791248000  |             |
| 6                                          | -0.364546000 | -3.300777000 | -0.650654000 |             |
| 6                                          | -4.085630000 | 0.395049000  | 2.361417000  |             |
| 6                                          | -3.154450000 | -0.442627000 | 3.083967000  |             |
| 6                                          | -4.778664000 | -0.119285000 | 1.266390000  |             |
| 6                                          | -2.952986000 | -1.764629000 | 2.689318000  |             |
| 6                                          | -1.615101000 | -2.313148000 | 2.667292000  |             |
| 6                                          | -2.027014000 | 0.374342000  | 3.475349000  |             |
| 6                                          | -0.740603000 | -0.160462000 | 3.462560000  |             |
| 6                                          | -0.531081000 | -1.529056000 | 3.051494000  |             |
| 6                                          | -4.414448000 | 1.969702000  | 0.019175000  |             |
| 6                                          | -3.692093000 | 2.501831000  | 1.152430000  |             |
| 6                                          | -4.947889000 | 0.682244000  | 0.074981000  |             |
| 6                                          | -3.530141000 | 1.728330000  | 2.302397000  |             |
| 6                                          | -2.259664000 | 1.717828000  | 2.991678000  |             |
| 6                                          | -2.586365000 | 3.285675000  | 0.651048000  |             |
| 6                                          | -1.364777000 | 3.279885000  | 1.317880000  |             |
| 6                                          | -1.198221000 | 2.481976000  | 2.509136000  |             |
| 6                                          | -4.215120000 | 0.249372000  | -2.233469000 |             |
| 6                                          | -3.659597000 | 1.582592000  | -2.290468000 |             |
| 6                                          | -4.844627000 | -0.193327000 | -1.070758000 |             |
| 6                                          | -3.757798000 | 2.427901000  | -1.184327000 |             |
| 6                                          | -2.627167000 | 3.240026000  | -0.797576000 |             |
| 6                                          | -2.429774000 | 1.526411000  | -3.047720000 |             |
| 6                                          | -1.344041000 | 2.318174000  | -2.676466000 |             |
| 6                                          | -1.444598000 | 3.189781000  | -1.530430000 |             |
| 6                                          | 0.798007000  | 2.401378000  | 1.291329000  |             |
| 6                                          | -0.128385000 | 3.217646000  | 0.561686000  |             |
| 6                                          | -0.167453000 | 3.174105000  | -0.843398000 |             |
| 6                                          | 1.662181000  | 1.535447000  | 0.591621000  |             |
| 6                                          | 1.253033000  | -0.258269000 | 2.248341000  |             |
| 6                                          | 0.360161000  | 0.629950000  | 2.953984000  |             |
| 6                                          | 0.137662000  | 1.927084000  | 2.486675000  |             |
| 6                                          | 1.887603000  | 0.191824000  | 1.081683000  |             |
| 6                                          | 1.466442000  | -1.991104000 | -0.021744000 |             |
| 6                                          | 0.807824000  | -2.435699000 | 1.177661000  |             |
| 6                                          | 0.701590000  | -1.583408000 | 2.288951000  |             |
| 6                                          | 2.011487000  | -0.683509000 | -0.079869000 |             |
| 6                                          | 1.121208000  | -0.404306000 | -2.380920000 |             |
| 6                                          | 0.569031000  | -1.729693000 | -2.305406000 |             |
| 6                                          | 0.739821000  | -2.509138000 | -1.151833000 |             |
| <b>(C<sub>60</sub>)NiNeT<sub>3</sub>Cl</b> |              |              |              |             |
| 6                                          | -3.225180000 | 0.222474000  | 3.041997000  |             |
| 6                                          | -2.085825000 | 1.074605000  | 3.306510000  |             |
| 6                                          | -3.055094000 | -1.156747000 | 2.936338000  |             |
| 6                                          | -0.818541000 | 0.515737000  | 3.459711000  |             |
| 6                                          | 0.325529000  | 1.157702000  | 2.849501000  |             |
| 6                                          | -2.253742000 | 2.294188000  | 2.548140000  |             |
| 6                                          | -1.148369000 | 2.915721000  | 1.966774000  |             |
| 6                                          | 0.167749000  | 2.337636000  | 2.120063000  |             |
| 6                                          | -4.590119000 | -1.225270000 | 1.016533000  |             |
| 6                                          | -4.767128000 | 0.205728000  | 1.126759000  |             |
| 6                                          | -3.749733000 | -1.894287000 | 1.905195000  |             |
| 6                                          | -4.098491000 | 0.916658000  | 2.122198000  |             |
| 6                                          | -3.494733000 | 2.193360000  | 1.815079000  |             |
| 6                                          | -4.864757000 | 0.748315000  | -0.209844000 |             |
| 6                                          | -4.286854000 | 1.982181000  | -0.505704000 |             |
| 6                                          | -3.588689000 | 2.718028000  | 0.524276000  |             |
| 6                                          | -2.850065000 | -3.255860000 | 0.060641000  |             |
| 6                                          | -3.728091000 | -2.566474000 | -0.857873000 |             |
| 6                                          | -2.860700000 | -2.925277000 | 1.419340000  |             |
| 6                                          | -4.579484000 | -1.567213000 | -0.388552000 |             |
| 6                                          | -4.749882000 | -0.347282000 | -1.146486000 |             |
| 6                                          | -3.015767000 | -2.382636000 | -2.102104000 |             |
| 6                                          | -3.179169000 | -1.206241000 | -2.831980000 |             |
| 6                                          | -4.064373000 | -0.170660000 | -2.347532000 |             |
| 6                                          | -0.407611000 | -3.074696000 | 1.498821000  |             |
| 6                                          | -0.396525000 | -3.415745000 | 0.095581000  |             |
| 6                                          | -1.618834000 | -2.831058000 | 2.146507000  |             |
| 6                                          | -1.596951000 | -3.500117000 | -0.609551000 |             |
| 6                                          | -1.697369000 | -2.956556000 | -1.949494000 |             |
| 6                                          | 0.752136000  | -2.777019000 | -0.508686000 |             |
| 6                                          | 0.648097000  | -2.243258000 | -1.805120000 |             |
| 6                                          | -0.595585000 | -2.345947000 | -2.542255000 |             |
| 6                                          | -0.641564000 | -0.914374000 | 3.346785000  |             |
| 6                                          | 0.612718000  | -1.157867000 | 2.663217000  |             |
| 6                                          | -1.736843000 | -1.732947000 | 3.084475000  |             |
| 6                                          | 0.734210000  | -2.226294000 | 1.759941000  |             |
| 6                                          | 1.450520000  | -2.055624000 | 0.521995000  |             |
| 6                                          | 1.210031000  | 0.117063000  | 2.375557000  |             |
| 6                                          | 1.883444000  | 0.295768000  | 1.165533000  |             |
| 6                                          | 2.025548000  | -0.796858000 | 0.220619000  |             |
| 6                                          | 0.371338000  | -0.274752000 | -3.039765000 |             |
| 6                                          | 1.245298000  | -0.978186000 | -2.126676000 |             |
| 6                                          | 1.903882000  | -0.259872000 | -1.124291000 |             |
| 6                                          | 0.205272000  | 1.106764000  | -2.935056000 |             |
| 6                                          | -2.208942000 | 0.863985000  | -3.332150000 |             |
| 6                                          | -2.033675000 | -0.566967000 | -3.442430000 |             |
| 6                                          | -0.765917000 | -1.129100000 | -3.303037000 |             |
| 6                                          | -1.110287000 | 1.686908000  | -3.084255000 |             |
| 6                                          | -2.429090000 | 3.007586000  | -1.487331000 |             |
| 6                                          | -3.571868000 | 2.165160000  | -1.748640000 |             |
| 6                                          | -3.461276000 | 1.106898000  | -2.652568000 |             |
| 6                                          | -1.223113000 | 2.778377000  | -2.144605000 |             |
| 6                                          | 0.014182000  | 3.203096000  | -0.043321000 |             |
| 6                                          | -1.243862000 | 3.452543000  | 0.629244000  |             |
| 6                                          | -2.439742000 | 3.350726000  | -0.077481000 |             |
| 6                                          | 0.023884000  | 2.869507000  | -1.413060000 |             |
| 6                                          | 1.735472000  | 1.168653000  | -1.009397000 |             |
| 6                                          | 1.727435000  | 1.511792000  | 0.403979000  |             |

|                                         |              |              |              |                                      |              |              |              |
|-----------------------------------------|--------------|--------------|--------------|--------------------------------------|--------------|--------------|--------------|
| 6                                       | 1.816872000  | 0.116269000  | -1.282347000 | 6                                    | 0.884519000  | 2.533418000  | 0.877637000  |
| 6                                       | 0.718487000  | 2.311408000  | -1.570978000 | 6                                    | 0.904169000  | 1.854629000  | -1.910491000 |
| 6                                       | -0.007273000 | 1.764359000  | -2.694990000 | 28                                   | 3.617618000  | 0.599830000  | -0.121072000 |
| 6                                       | 0.189354000  | 0.438655000  | -3.090279000 | 17                                   | 4.666092000  | 2.436704000  | -0.475203000 |
| 6                                       | 1.624053000  | 1.489608000  | -0.867033000 | 7                                    | 5.175496000  | -0.611469000 | 0.124220000  |
| 15                                      | 5.188430000  | -0.550892000 | 0.054262000  | 6                                    | 6.516017000  | 0.044480000  | -0.063548000 |
| 6                                       | 5.516572000  | -1.618642000 | -1.402808000 | 1                                    | 6.508233000  | 0.498225000  | -1.055078000 |
| 1                                       | 5.790114000  | -0.954189000 | -2.229249000 | 1                                    | 6.557811000  | 0.881038000  | 0.633903000  |
| 1                                       | 6.416245000  | -2.200821000 | -1.160299000 | 6                                    | 7.708144000  | -0.873704000 | 0.109781000  |
| 6                                       | 4.371077000  | -2.528749000 | -1.807973000 | 1                                    | 7.774272000  | -1.307630000 | 1.111208000  |
| 1                                       | 3.508934000  | -1.951135000 | -2.155397000 | 1                                    | 8.615241000  | -0.284857000 | -0.040983000 |
| 1                                       | 4.039076000  | -3.170228000 | -0.985714000 | 1                                    | 7.733617000  | -1.688324000 | -0.619052000 |
| 1                                       | 4.675318000  | -3.181740000 | -2.628654000 | 6                                    | 4.999633000  | -1.733578000 | -0.854976000 |
| 6                                       | 6.825056000  | 0.201773000  | 0.400508000  | 1                                    | 5.739042000  | -2.509290000 | -0.617069000 |
| 1                                       | 6.677556000  | 0.959062000  | 1.178005000  | 1                                    | 4.019087000  | -2.175250000 | -0.653741000 |
| 1                                       | 7.454395000  | -0.579952000 | 0.845108000  | 6                                    | 5.119964000  | -1.307006000 | -2.299983000 |
| 6                                       | 7.504447000  | 0.802639000  | -0.821562000 | 1                                    | 4.496273000  | -0.432994000 | -2.518796000 |
| 1                                       | 6.855143000  | 1.499593000  | -1.358414000 | 1                                    | 4.788994000  | -2.119834000 | -2.949842000 |
| 1                                       | 7.822424000  | 0.030940000  | -1.526871000 | 1                                    | 6.147499000  | -1.063158000 | -2.578750000 |
| 1                                       | 8.395719000  | 1.358339000  | -0.524244000 | 6                                    | 5.049324000  | -1.167626000 | 1.511532000  |
| 6                                       | 4.939009000  | -1.713626000 | 1.454352000  | 1                                    | 4.067631000  | -1.648239000 | 1.567033000  |
| 1                                       | 3.977736000  | -2.217378000 | 1.298938000  | 1                                    | 5.790165000  | -1.969921000 | 1.624010000  |
| 1                                       | 5.715145000  | -2.486763000 | 1.378950000  | 6                                    | 5.211244000  | -0.133846000 | 2.602306000  |
| 6                                       | 4.980107000  | -1.030724000 | 2.813058000  | 1                                    | 6.242766000  | 0.211228000  | 2.700911000  |
| 1                                       | 4.238990000  | -0.227910000 | 2.883630000  | 1                                    | 4.918767000  | -0.566876000 | 3.561161000  |
| 1                                       | 5.961639000  | -0.596208000 | 3.020408000  | 1                                    | 4.579745000  | 0.744508000  | 2.428064000  |
| 1                                       | 4.767133000  | -1.747311000 | 3.609206000  |                                      |              |              |              |
| (C <sub>60</sub> )NiPMe <sub>3</sub> Cl |              |              |              | (C <sub>60</sub> )CuNMe <sub>3</sub> |              |              |              |
| 6                                       | -3.297816000 | -1.216620000 | -2.588247000 | 29                                   | 4.126931000  | -0.253979000 | -0.007392000 |
| 6                                       | -2.220067000 | -2.181635000 | -2.585456000 | 7                                    | 6.046449000  | 0.077904000  | 0.001512000  |
| 6                                       | -3.063668000 | 0.086698000  | -3.022890000 | 6                                    | 6.379117000  | 0.844134000  | 1.223971000  |
| 6                                       | -0.951656000 | -0.813019000 | -3.024390000 | 1                                    | 5.794820000  | 1.766664000  | 1.246963000  |
| 6                                       | 0.217358000  | -2.259544000 | -2.294167000 | 1                                    | 6.139952000  | 0.249442000  | 2.107659000  |
| 6                                       | -2.368689000 | -3.016085000 | -1.411209000 | 6                                    | 6.836042000  | -1.172563000 | -0.021956000 |
| 6                                       | -1.243287000 | -3.454895000 | -0.713974000 | 1                                    | 6.599764000  | -1.740464000 | -0.923528000 |
| 6                                       | 0.077693000  | -3.070543000 | -1.159731000 | 1                                    | 7.911278000  | -0.949840000 | -0.014157000 |
| 6                                       | -4.415504000 | 0.975188000  | -1.171189000 | 6                                    | 6.385922000  | 0.893652000  | -1.186416000 |
| 6                                       | -4.660261000 | -0.376941000 | -0.720583000 | 1                                    | 7.453809000  | 1.148879000  | -1.189897000 |
| 6                                       | -3.633616000 | 1.203107000  | -2.302544000 | 1                                    | 5.800846000  | 1.815914000  | -1.175200000 |
| 6                                       | -4.111058000 | -1.453453000 | -1.416562000 | 1                                    | 6.152661000  | 0.335496000  | -2.095140000 |
| 6                                       | -3.535272000 | -2.563046000 | -0.691928000 | 1                                    | 7.447115000  | 1.098101000  | 1.244478000  |
| 6                                       | -4.659801000 | -0.373536000 | 0.724668000  | 1                                    | 6.594430000  | -1.777354000 | 0.853845000  |
| 6                                       | -4.110182000 | -1.446778000 | 1.425367000  | 6                                    | -3.546781000 | -0.442324000 | -2.354058000 |
| 6                                       | -3.534817000 | -2.559751000 | 0.705583000  | 6                                    | -2.753574000 | 0.590653000  | -2.981330000 |
| 6                                       | -2.515284000 | 3.085123000  | -1.176576000 | 6                                    | -4.267719000 | -0.158952000 | -1.194686000 |
| 6                                       | -3.331033000 | 2.851197000  | -0.006000000 | 6                                    | -2.711729000 | 1.870862000  | -2.429017000 |
| 6                                       | -2.663349000 | 2.274969000  | -2.304095000 | 6                                    | -1.457501000 | 2.586462000  | -2.360689000 |
| 6                                       | -4.262492000 | 1.814317000  | -0.003250000 | 6                                    | -1.542451000 | -0.018204000 | -3.483627000 |
| 6                                       | -4.414734000 | 0.980700000  | 1.168730000  | 6                                    | -0.334882000 | 0.674827000  | -3.423230000 |
| 6                                       | -2.514498000 | 3.090635000  | 1.162930000  | 6                                    | -0.291558000 | 2.001111000  | -2.851677000 |
| 6                                       | -2.661831000 | 2.285798000  | 2.294362000  | 6                                    | -3.603190000 | -2.318244000 | -0.220387000 |
| 6                                       | -3.632093000 | 1.213943000  | 2.298470000  | 6                                    | -2.853419000 | -2.611157000 | -1.421327000 |
| 6                                       | -0.223286000 | 2.204091000  | -2.604135000 | 6                                    | -4.296286000 | -1.113514000 | -0.108875000 |
| 6                                       | -0.069990000 | 3.037294000  | -1.435663000 | 6                                    | -2.825645000 | -1.690403000 | -2.468642000 |
| 6                                       | -1.497030000 | 1.826310000  | -3.028922000 | 6                                    | -1.587373000 | -1.429759000 | -3.166864000 |
| 6                                       | -1.194741000 | 3.463142000  | -0.733926000 | 6                                    | -1.643556000 | -3.302046000 | -1.036492000 |
| 6                                       | -1.194254000 | 3.466559000  | 0.717647000  | 6                                    | -0.451614000 | -3.055671000 | -1.715103000 |
| 6                                       | 1.101545000  | 2.581277000  | -0.712406000 | 6                                    | -0.423018000 | -2.102178000 | -2.799837000 |
| 6                                       | 1.102044000  | 2.584629000  | 0.698800000  | 6                                    | -3.552746000 | -0.869781000 | 2.223534000  |
| 6                                       | -0.069019000 | 3.044016000  | 1.420637000  | 6                                    | -2.831843000 | -2.117868000 | 2.107367000  |
| 6                                       | -0.708338000 | -0.461558000 | -3.475663000 | 6                                    | -4.270794000 | -0.376505000 | 1.134935000  |
| 6                                       | 0.609126000  | -0.071292000 | -3.023965000 | 6                                    | -2.856869000 | -2.829168000 | 0.907697000  |



|                   |              |              |              |                |              |              |              |
|-------------------|--------------|--------------|--------------|----------------|--------------|--------------|--------------|
| 6                 | -1.743354000 | 0.471739000  | -3.472365000 | 6              | -1.645589000 | -3.436695000 | 0.404918000  |
| 6                 | 0.851186000  | 1.237003000  | -2.601606000 | 6              | -1.595424000 | -1.990918000 | 2.844926000  |
| 6                 | 1.675952000  | 1.490593000  | -1.441013000 | 6              | -0.429978000 | -2.584655000 | 2.363630000  |
| 6                 | 1.178199000  | -1.191159000 | -2.307011000 | 6              | -0.455570000 | -3.320472000 | 1.120703000  |
| 6                 | 1.955607000  | -0.953049000 | -1.174332000 | 6              | -3.465374000 | 1.901047000  | 1.600418000  |
| 6                 | 2.244507000  | 0.400794000  | -0.740185000 | 6              | -2.718547000 | 1.389069000  | 2.727660000  |
| 6                 | 0.852909000  | 1.249236000  | 2.594442000  | 6              | -4.226469000 | 1.033652000  | 0.817724000  |
| 6                 | 1.676920000  | 1.497359000  | 1.432137000  | 6              | -2.761817000 | 0.029037000  | 3.033717000  |
| 6                 | 2.245100000  | 0.404221000  | 0.736070000  | 6              | -1.551711000 | -0.662416000 | 3.417914000  |
| 6                 | 0.611093000  | -0.057078000 | 3.023128000  | 6              | -1.464460000 | 2.104514000  | 2.796219000  |
| 6                 | -1.741088000 | 0.488071000  | 3.470446000  | 6              | -0.299674000 | 1.438620000  | 3.174352000  |
| 6                 | -1.495045000 | 1.840567000  | 3.020528000  | 6              | -0.344185000 | 0.029486000  | 3.490089000  |
| 6                 | -0.221571000 | 2.216300000  | 2.593097000  | 6              | -3.461639000 | 2.165565000  | -1.228534000 |
| 6                 | -0.706082000 | -0.445206000 | 3.477546000  | 6              | -2.670339000 | 3.063153000  | -0.417226000 |
| 6                 | -2.218406000 | -2.169484000 | 2.596458000  | 6              | -4.224673000 | 1.168278000  | -0.621930000 |
| 6                 | -3.296151000 | -1.204428000 | 2.595363000  | 6              | -2.672365000 | 2.933423000  | 0.971597000  |
| 6                 | -3.061702000 | 0.100927000  | 3.023681000  | 6              | -1.435630000 | 3.059875000  | 1.709913000  |
| 6                 | -0.949701000 | -1.798767000 | 3.032775000  | 6              | -1.431707000 | 3.323752000  | -1.115808000 |
| 6                 | 0.078438000  | -3.065094000 | 1.173473000  | 6              | -0.240972000 | 3.452297000  | -0.402563000 |
| 6                 | -1.242820000 | -3.451524000 | 0.730371000  | 6              | -0.242990000 | 3.317898000  | 1.036104000  |
| 6                 | -2.367769000 | -3.009427000 | 1.426261000  | 6              | 1.656817000  | 0.453705000  | 2.362580000  |
| 6                 | 0.218827000  | -2.248766000 | 2.303934000  | 6              | 0.937520000  | 1.699583000  | 2.471454000  |
| 6                 | 1.956360000  | -0.947529000 | 1.176854000  | 6              | 0.964988000  | 2.621051000  | 1.421435000  |
| 6                 | 1.821609000  | -1.781091000 | 0.003279000  | 6              | 2.391623000  | 0.170935000  | 1.204699000  |
| 6                 | 0.893977000  | -2.841331000 | 0.006060000  | 6              | 1.572866000  | -2.168644000 | 1.236114000  |
| 6                 | 1.179710000  | -1.180292000 | 2.311120000  | 6              | 0.824004000  | -1.865278000 | 2.430443000  |
| 28                | 3.836824000  | -0.604220000 | -0.000478000 | 6              | 0.865611000  | -0.581072000 | 2.982018000  |
| 17                | 5.279767000  | -2.181650000 | 0.000048000  | 6              | 2.346954000  | -1.169178000 | 0.628641000  |
| 15                | 5.410244000  | 0.847705000  | -0.000017000 | 6              | 1.576421000  | -1.902210000 | -1.609243000 |
| 6                 | 6.480568000  | 0.695975000  | 1.451677000  | 6              | 0.784785000  | -2.925824000 | -0.973320000 |
| 1                 | 5.901359000  | 0.828600000  | 2.367691000  | 6              | 0.782804000  | -3.056056000 | 0.419430000  |
| 6                 | 6.927439000  | -0.299575000 | 1.463476000  | 6              | 2.348262000  | -1.032852000 | -0.825396000 |
| 6                 | 4.833526000  | 2.568467000  | -0.004329000 | 6              | 1.662467000  | 0.882343000  | -2.230187000 |
| 1                 | 5.691022000  | 3.247722000  | -0.005500000 | 6              | 0.873733000  | -0.019461000 | -3.033601000 |
| 1                 | 4.229939000  | 2.768698000  | -0.892601000 | 6              | 0.830710000  | -1.383184000 | -2.729111000 |
| 6                 | 6.487354000  | 0.691355000  | -1.446156000 | 6              | 2.394107000  | 0.389913000  | -1.143162000 |
| 1                 | 5.912566000  | 0.821810000  | -2.365255000 | 6              | 1.712532000  | 2.333225000  | 0.221224000  |
| 1                 | 7.275887000  | 1.448991000  | -1.411808000 | 6              | 0.968451000  | 2.839175000  | -0.906990000 |
| 1                 | 4.229001000  | 2.772874000  | 0.882333000  | 6              | 0.943632000  | 2.127468000  | -2.109261000 |
| 1                 | 7.268879000  | 1.453921000  | 1.419039000  | 6              | 2.418824000  | 1.130689000  | 0.109913000  |
| 1                 | 6.933617000  | -0.304497000 | -1.453109000 |                |              |              |              |
| $(C_{60})CuPEt_3$ |              |              |              | $(C_{60})CuCO$ |              |              |              |
| 29                | 3.670247000  | 0.076939000  | -0.120872000 | 29             | -4.456395000 | -0.001425000 | -0.003183000 |
| 15                | 5.828730000  | -0.015238000 | 0.031631000  | 8              | -7.392880000 | 0.002444000  | 0.006817000  |
| 6                 | -3.992349000 | 1.608072000  | 1.827059000  | 6              | -6.250458000 | 0.000496000  | 0.001675000  |
| 6                 | -3.200375000 | 1.019486000  | 2.883596000  | 6              | 3.212600000  | -0.114277000 | -2.412640000 |
| 6                 | -4.732093000 | 0.791221000  | 0.972849000  | 6              | 2.452177000  | -1.300514000 | -2.736093000 |
| 6                 | -3.177402000 | -0.365360000 | 3.049180000  | 6              | 3.943415000  | -0.057645000 | -1.226686000 |
| 6                 | -1.930346000 | -1.036450000 | 3.340717000  | 6              | 2.451992000  | -2.388765000 | -1.863566000 |
| 6                 | -1.976925000 | 1.780470000  | 3.002960000  | 6              | 1.221048000  | -3.097680000 | -1.596165000 |
| 6                 | -0.776448000 | 1.133420000  | 3.290725000  | 6              | 1.221518000  | -0.885069000 | -3.370300000 |
| 6                 | -0.752772000 | -0.300828000 | 3.462406000  | 6              | 0.037756000  | -1.575122000 | -3.118792000 |
| 6                 | -4.062401000 | 2.158887000  | -0.959822000 | 6              | 0.037578000  | -2.701679000 | -2.215294000 |
| 6                 | -3.293138000 | 3.004568000  | -0.074518000 | 6              | 3.211378000  | 2.261373000  | -0.853895000 |
| 6                 | -4.767941000 | 1.071471000  | -0.445460000 | 6              | 2.451000000  | 2.201773000  | -2.082026000 |
| 6                 | -3.258790000 | 2.733866000  | 1.293528000  | 6              | 3.942925000  | 1.151336000  | -0.433457000 |
| 6                 | -2.013285000 | 2.841105000  | 2.019164000  | 6              | 2.451520000  | 1.035518000  | -2.847096000 |
| 6                 | -2.082375000 | 3.390493000  | -0.763527000 | 6              | 1.220975000  | 0.561305000  | -3.438823000 |
| 6                 | -0.883403000 | 3.500761000  | -0.061720000 | 6              | 1.219758000  | 2.932622000  | -1.883258000 |
| 6                 | -0.848383000 | 3.221364000  | 1.355263000  | 6              | 0.036378000  | 2.479234000  | -2.461877000 |
| 6                 | -4.057909000 | -0.322679000 | -2.344389000 | 6              | 0.037033000  | 1.271748000  | -3.254075000 |
| 6                 | -3.324171000 | 0.803984000  | -2.876353000 | 6              | 3.210180000  | 1.512876000  | 1.887179000  |

|   |              |              |              |   |              |              |              |
|---|--------------|--------------|--------------|---|--------------|--------------|--------------|
| 6 | -4.765755000 | -0.191599000 | -1.149985000 | 6 | 2.449008000  | 2.661775000  | 1.450820000  |
| 6 | -3.326327000 | 2.022125000  | -2.196838000 | 6 | 3.942325000  | 0.770478000  | 0.961532000  |
| 6 | -2.102965000 | 2.783171000  | -2.077101000 | 6 | 2.449589000  | 3.029256000  | 0.105282000  |
| 6 | -2.098709000 | 0.305496000  | -3.459428000 | 6 | 1.218911000  | 3.444939000  | -0.528912000 |
| 6 | -0.921640000 | 1.043704000  | -3.350460000 | 6 | 1.217619000  | 2.697470000  | 2.207031000  |
| 6 | -0.923897000 | 2.305061000  | -2.645831000 | 6 | 0.034143000  | 3.107133000  | 1.596894000  |
| 6 | -3.986113000 | -2.406070000 | -0.413466000 | 6 | 0.034766000  | 3.487869000  | 0.203788000  |
| 6 | -3.250140000 | -2.540779000 | -1.650626000 | 6 | 3.211000000  | -1.325655000 | 2.022300000  |
| 6 | -4.728600000 | -1.251604000 | -0.167537000 | 6 | 2.449060000  | -0.556039000 | 2.979769000  |
| 6 | -3.285319000 | -1.518101000 | -2.598332000 | 6 | 3.942564000  | -0.674028000 | 1.030217000  |
| 6 | -2.074938000 | -1.131487000 | -3.287670000 | 6 | 2.448615000  | 0.837216000  | 2.913498000  |
| 6 | -2.003317000 | -3.211589000 | -1.359206000 | 6 | 1.217467000  | 1.567963000  | 3.112874000  |
| 6 | -0.838348000 | -2.842637000 | -2.029393000 | 6 | 1.218189000  | -1.265003000 | 3.247549000  |
| 6 | -0.874693000 | -1.784039000 | -3.011577000 | 6 | 0.034248000  | -0.558867000 | 3.448100000  |
| 6 | -3.946174000 | -1.212112000 | 2.164952000  | 6 | 0.033711000  | 0.883709000  | 3.379745000  |
| 6 | -3.173967000 | -2.407388000 | 1.909250000  | 6 | 3.212436000  | -2.331161000 | -0.635385000 |
| 6 | -4.708166000 | -0.643838000 | 1.144588000  | 6 | 2.450955000  | -3.004809000 | 0.392290000  |
| 6 | -3.193871000 | -2.993542000 | 0.643620000  | 6 | 3.943245000  | -1.185719000 | -0.322165000 |
| 6 | -1.968297000 | -3.491585000 | 0.060270000  | 6 | 2.450088000  | -2.511071000 | 1.696799000  |
| 6 | -1.928070000 | -2.300145000 | 2.634966000  | 6 | 1.218850000  | -2.475658000 | 2.453280000  |
| 6 | -0.748550000 | -2.788021000 | 2.075108000  | 6 | 1.220429000  | -3.479414000 | -0.199396000 |
| 6 | -0.769080000 | -3.393963000 | 0.763722000  | 6 | 0.036288000  | -3.452768000 | 0.534078000  |
| 6 | 1.138017000  | -1.612381000 | -1.838350000 | 6 | 0.035467000  | -2.941793000 | 1.884874000  |
| 6 | 0.406229000  | -2.732276000 | -1.299313000 | 6 | -1.953446000 | 0.114910000  | 2.424037000  |
| 6 | 0.440206000  | -3.003051000 | 0.071663000  | 6 | -1.194796000 | -1.034144000 | 2.848738000  |
| 6 | 1.888038000  | -0.794510000 | -0.983429000 | 6 | -1.194293000 | -2.203539000 | 2.081599000  |
| 6 | 1.091663000  | 1.219810000  | -2.178202000 | 6 | -2.696992000 | 0.058184000  | 1.236478000  |
| 6 | 0.324795000  | 0.369536000  | -3.054746000 | 6 | -1.953327000 | 2.342038000  | 0.638518000  |
| 6 | 0.347802000  | -1.018727000 | -2.888625000 | 6 | -1.195325000 | 2.390668000  | 1.862984000  |
| 6 | 1.864289000  | 0.650810000  | -1.156880000 | 6 | -1.195480000 | 1.299493000  | 2.737874000  |
| 6 | 1.131825000  | 2.418190000  | 0.411499000  | 6 | -2.696854000 | 1.195019000  | 0.324915000  |
| 6 | 0.341164000  | 2.997256000  | -0.646665000 | 6 | -1.951854000 | 1.331943000  | -2.031531000 |
| 6 | 0.321303000  | 2.410209000  | -1.915246000 | 6 | -1.193405000 | 2.511028000  | -1.698614000 |
| 6 | 1.884460000  | 1.262789000  | 0.164769000  | 6 | -1.194299000 | 3.006077000  | -0.390572000 |
| 6 | 1.203318000  | 0.326065000  | 2.348769000  | 6 | -2.696110000 | 0.679433000  | -1.038001000 |
| 6 | 0.432684000  | 1.519964000  | 2.595740000  | 6 | -1.951052000 | -1.519775000 | -1.895812000 |
| 6 | 0.397556000  | 2.545402000  | 1.646363000  | 6 | -1.191917000 | -0.839008000 | -2.913821000 |
| 6 | 1.921831000  | 0.194794000  | 1.154119000  | 6 | -1.192386000 | 0.558010000  | -2.980287000 |
| 6 | 1.207540000  | -2.164468000 | 0.959824000  | 6 | -2.695844000 | -0.776311000 | -0.968816000 |
| 6 | 0.473704000  | -2.021867000 | 2.193674000  | 6 | -1.952250000 | -2.271749000 | 0.858029000  |
| 6 | 0.471597000  | -0.800850000 | 2.874368000  | 6 | -1.192930000 | -3.030179000 | -0.103469000 |
| 6 | 1.922811000  | -1.076605000 | 0.444739000  | 6 | -1.192340000 | -2.661691000 | -1.452647000 |
| 6 | 6.700108000  | -0.337459000 | -1.548323000 | 6 | -2.696427000 | -1.160127000 | 0.437021000  |
| 1 | 6.627025000  | 0.577686000  | -2.146356000 |   |              |              |              |
| 1 | 7.765517000  | -0.487390000 | -1.335020000 |   |              |              |              |
| 6 | 6.113814000  | -1.518104000 | -2.306722000 |   |              |              |              |
| 1 | 5.047950000  | -1.366160000 | -2.510983000 |   |              |              |              |
| 1 | 6.211837000  | -2.453819000 | -1.748449000 |   |              |              |              |
| 1 | 6.618466000  | -1.657964000 | -3.264579000 |   |              |              |              |
| 6 | 6.593526000  | 1.510365000  | 0.701140000  |   |              |              |              |
| 1 | 6.310631000  | 1.572358000  | 1.758018000  |   |              |              |              |
| 1 | 7.683808000  | 1.393447000  | 0.675647000  |   |              |              |              |
| 6 | 6.150317000  | 2.759329000  | -0.044919000 |   |              |              |              |
| 1 | 5.060148000  | 2.867880000  | -0.019562000 |   |              |              |              |
| 1 | 6.454428000  | 2.738846000  | -1.095476000 |   |              |              |              |
| 1 | 6.583581000  | 3.656918000  | 0.400441000  |   |              |              |              |
| 6 | 6.364945000  | -1.356224000 | 1.162293000  |   |              |              |              |
| 1 | 6.203409000  | -2.303083000 | 0.635007000  |   |              |              |              |
| 1 | 7.446192000  | -1.269017000 | 1.323683000  |   |              |              |              |
| 6 | 5.601212000  | -1.341982000 | 2.477796000  |   |              |              |              |
| 1 | 4.520941000  | -1.414738000 | 2.303599000  |   |              |              |              |
| 1 | 5.779637000  | -0.423686000 | 3.045164000  |   |              |              |              |
| 1 | 5.894441000  | -2.179501000 | 3.113565000  |   |              |              |              |

**ii. Cartesian coordinates of optimized geometry of  $(\text{Cl}^-@C_{60})\text{ML}_n$  complexes at Mo6L/6-31G(d,p) level.  
Atomic number followed by X, Y, Z coordinates in Å.**

| $(\text{Cl}^-@C_{60})\text{ScNMe}_3(\text{CO})_2$ |              |              |              | $(\text{Cl}^-@C_{60})\text{ScPMe}_3(\text{CO})_2$ |              |              |              |
|---------------------------------------------------|--------------|--------------|--------------|---------------------------------------------------|--------------|--------------|--------------|
| 21                                                | 4.325985000  | -0.358307000 | -0.000172000 | 21                                                | 4.148142000  | 0.955801000  | -0.578874000 |
| 7                                                 | 5.664712000  | 1.515743000  | -0.000165000 | 15                                                | 5.552011000  | -1.364868000 | -0.251128000 |
| 8                                                 | 5.418243000  | -2.493277000 | -2.340335000 | 8                                                 | 4.796067000  | 1.773916000  | 2.585100000  |
| 8                                                 | 5.418012000  | -2.492061000 | 2.341201000  | 8                                                 | 4.081036000  | 4.268259000  | -1.061912000 |
| 6                                                 | 5.050211000  | -1.737033000 | -1.537048000 | 6                                                 | 4.660126000  | 1.495841000  | 1.462635000  |
| 6                                                 | 5.050073000  | -1.736258000 | 1.537457000  | 6                                                 | 4.191266000  | 3.116559000  | -0.955153000 |
| 6                                                 | 7.092595000  | 1.162733000  | 0.000032000  | 6                                                 | 7.353538000  | -1.235688000 | 0.075371000  |
| 1                                                 | 7.330211000  | 0.573205000  | 0.890012000  | 1                                                 | 7.883134000  | -0.864986000 | -0.805576000 |
| 1                                                 | 7.330458000  | 0.573207000  | -0.889884000 | 1                                                 | 7.531478000  | -0.538654000 | 0.898228000  |
| 6                                                 | 5.326871000  | 2.288885000  | -1.209441000 | 6                                                 | 4.952629000  | -2.182363000 | 1.271363000  |
| 1                                                 | 4.265279000  | 2.552555000  | -1.185977000 | 1                                                 | 3.900794000  | -2.458732000 | 1.157591000  |
| 1                                                 | 5.921312000  | 3.211211000  | -1.269810000 | 1                                                 | 5.531983000  | -3.086607000 | 1.483734000  |
| 6                                                 | 5.326563000  | 2.288934000  | 1.208999000  | 6                                                 | 5.478039000  | -2.732300000 | -1.472318000 |
| 1                                                 | 5.921081000  | 3.211199000  | 1.269536000  | 1                                                 | 5.997291000  | -3.623641000 | -1.106897000 |
| 1                                                 | 5.522217000  | 1.684519000  | 2.099686000  | 1                                                 | 5.929496000  | -2.427535000 | -2.419350000 |
| 1                                                 | 4.265004000  | 2.552707000  | 1.185200000  | 1                                                 | 4.432231000  | -2.990104000 | -1.661585000 |
| 1                                                 | 7.725560000  | 2.061501000  | 0.000125000  | 1                                                 | 7.774557000  | -2.208188000 | 0.348007000  |
| 1                                                 | 5.522879000  | 1.684489000  | -2.100062000 | 1                                                 | 5.029687000  | -1.493781000 | 2.116104000  |
| 6                                                 | -3.468912000 | 2.286054000  | 1.419298000  | 6                                                 | -3.610797000 | -2.392045000 | -1.115648000 |
| 6                                                 | -2.764077000 | 1.810004000  | 2.586407000  | 6                                                 | -3.090770000 | -1.880691000 | -2.361941000 |
| 6                                                 | -4.318974000 | 1.429455000  | 0.722149000  | 6                                                 | -4.384798000 | -1.573163000 | -0.295981000 |
| 6                                                 | -2.938522000 | 0.495981000  | 3.018610000  | 6                                                 | -3.365848000 | -0.568871000 | -2.746589000 |
| 6                                                 | -1.799511000 | -0.270935000 | 3.464034000  | 6                                                 | -2.326080000 | 0.242099000  | -3.334608000 |
| 6                                                 | -1.446990000 | 2.401881000  | 2.587824000  | 6                                                 | -1.766767000 | -2.424448000 | -2.552710000 |
| 6                                                 | -0.350238000 | 1.664587000  | 3.026542000  | 6                                                 | -0.767910000 | -1.643994000 | -3.129208000 |
| 6                                                 | -0.531234000 | 0.303289000  | 3.472336000  | 6                                                 | -1.052355000 | -0.286602000 | -3.527968000 |
| 6                                                 | -3.469074000 | 2.285713000  | -1.419577000 | 6                                                 | -3.218639000 | -2.418020000 | 1.696586000  |
| 6                                                 | -2.586453000 | 3.170860000  | -0.697318000 | 6                                                 | -2.413282000 | -3.264245000 | 0.846897000  |
| 6                                                 | -4.319056000 | 1.429281000  | -0.722126000 | 6                                                 | -4.185342000 | -1.586272000 | 1.134721000  |
| 6                                                 | -2.586373000 | 3.171030000  | 0.696726000  | 6                                                 | -2.606116000 | -3.251455000 | -0.534064000 |
| 6                                                 | -1.336630000 | 3.245193000  | 1.416699000  | 6                                                 | -1.466830000 | -3.273620000 | -1.420518000 |
| 6                                                 | -1.336797000 | 3.244853000  | -1.417456000 | 6                                                 | -1.074917000 | -3.299774000 | 1.386997000  |
| 6                                                 | -0.134511000 | 3.328623000  | -0.721699000 | 6                                                 | 0.023330000  | -3.331119000 | 0.530836000  |
| 6                                                 | -0.134426000 | 3.328793000  | 0.720779000  | 6                                                 | -0.176699000 | -3.317021000 | -0.897927000 |
| 6                                                 | -3.821230000 | -0.391519000 | -2.296392000 | 6                                                 | -3.535554000 | 0.237281000  | 2.649857000  |
| 6                                                 | -2.938868000 | 0.495259000  | -3.018525000 | 6                                                 | -2.531509000 | -0.623578000 | 3.229538000  |
| 6                                                 | -4.498594000 | 0.067133000  | -1.168309000 | 6                                                 | -4.347106000 | -0.235452000 | 1.619890000  |
| 6                                                 | -2.764375000 | 1.809383000  | -2.586655000 | 6                                                 | -2.377173000 | -1.927837000 | 2.762450000  |
| 6                                                 | -1.447292000 | 2.401262000  | -2.588367000 | 6                                                 | -1.052115000 | -2.471208000 | 2.573217000  |
| 6                                                 | -1.799908000 | -0.271762000 | -3.463902000 | 6                                                 | -1.367790000 | 0.179440000  | 3.525161000  |
| 6                                                 | -0.531631000 | 0.302459000  | -3.472484000 | 6                                                 | -0.092387000 | -0.348966000 | 3.352850000  |
| 6                                                 | -0.350588000 | 1.663862000  | -3.027033000 | 6                                                 | 0.066130000  | -1.696921000 | 2.866413000  |
| 6                                                 | -4.038127000 | -2.046209000 | 0.000410000  | 6                                                 | -4.125232000 | 1.903362000  | 0.428842000  |
| 6                                                 | -3.333014000 | -2.519737000 | -1.167255000 | 6                                                 | -3.283928000 | 2.392328000  | 1.495248000  |
| 6                                                 | -4.608441000 | -0.774202000 | 0.000291000  | 6                                                 | -4.646728000 | 0.612269000  | 0.489640000  |
| 6                                                 | -3.227815000 | -1.707963000 | -2.296085000 | 6                                                 | -2.993458000 | 1.573815000  | 2.585281000  |
| 6                                                 | -1.977917000 | -1.635737000 | -3.015826000 | 6                                                 | -1.654159000 | 1.541590000  | 3.126113000  |
| 6                                                 | -2.193922000 | -3.288283000 | -0.722859000 | 6                                                 | -2.243140000 | 3.204588000  | 0.908710000  |
| 6                                                 | -0.992704000 | -3.225427000 | -1.423962000 | 6                                                 | -0.956662000 | 3.177406000  | 1.436886000  |
| 6                                                 | -0.882930000 | -2.384437000 | -2.591500000 | 6                                                 | -0.656076000 | 2.331567000  | 2.565654000  |
| 6                                                 | -3.820968000 | -0.390969000 | 2.296792000  | 6                                                 | -4.171292000 | 0.278315000  | -1.898743000 |
| 6                                                 | -3.227552000 | -1.707416000 | 2.296729000  | 6                                                 | -3.628250000 | 1.614797000  | -1.961011000 |
| 6                                                 | -4.498464000 | 0.067412000  | 1.168678000  | 6                                                 | -4.669829000 | -0.214549000 | -0.694314000 |
| 6                                                 | -3.332883000 | -2.519462000 | 1.168109000  | 6                                                 | -3.605262000 | 2.413047000  | -0.818452000 |
| 6                                                 | -2.193839000 | -3.288112000 | 0.723763000  | 6                                                 | -2.442188000 | 3.217437000  | -0.524996000 |
| 6                                                 | -1.977570000 | -1.635015000 | 3.016304000  | 6                                                 | -2.488656000 | 1.594775000  | -2.847726000 |
| 6                                                 | -0.882630000 | -2.383817000 | 2.592032000  | 6                                                 | -1.373004000 | 2.377972000  | -2.567277000 |

|                         |              |              |              |                           |              |              |              |
|-------------------------|--------------|--------------|--------------|---------------------------|--------------|--------------|--------------|
| 6                       | -0.992538000 | -3.225088000 | 1.424708000  | 6                         | -1.348501000 | 3.205550000  | -1.386060000 |
| 6                       | 1.136689000  | -2.268818000 | -1.424288000 | 6                         | 1.179303000  | 2.291644000  | 1.128048000  |
| 6                       | 0.256379000  | -3.146721000 | -0.698571000 | 6                         | 0.182696000  | 3.144006000  | 0.544364000  |
| 6                       | 0.256460000  | -3.146553000 | 0.699151000  | 6                         | -0.007841000 | 3.162378000  | -0.841223000 |
| 6                       | 1.989289000  | -1.404966000 | -0.722051000 | 6                         | 2.011765000  | 1.501752000  | 0.311521000  |
| 6                       | 1.482773000  | 0.420307000  | -2.303437000 | 6                         | 1.745062000  | -0.382663000 | 1.914405000  |
| 6                       | 0.603114000  | -0.467673000 | -3.017595000 | 6                         | 0.947938000  | 0.464088000  | 2.755563000  |
| 6                       | 0.432886000  | -1.785278000 | -2.585043000 | 6                         | 0.669563000  | 1.780871000  | 2.367783000  |
| 6                       | 2.184088000  | -0.045344000 | -1.181829000 | 6                         | 2.302014000  | 0.112011000  | 0.716388000  |
| 6                       | 1.702356000  | 2.086293000  | -0.000415000 | 6                         | 1.700686000  | -2.015113000 | -0.421286000 |
| 6                       | 1.003511000  | 2.549867000  | -1.165165000 | 6                         | 1.183447000  | -2.518552000 | 0.825447000  |
| 6                       | 0.899299000  | 1.735495000  | -2.301281000 | 6                         | 1.200949000  | -1.710826000 | 1.968169000  |
| 6                       | 2.324385000  | 0.813961000  | -0.000305000 | 6                         | 2.225964000  | -0.713976000 | -0.482178000 |
| 6                       | 1.483037000  | 0.420861000  | 2.303025000  | 6                         | 1.109945000  | -0.342944000 | -2.651003000 |
| 6                       | 0.899569000  | 1.736044000  | 2.300628000  | 6                         | 0.569628000  | -1.674936000 | -2.579608000 |
| 6                       | 1.003649000  | 2.550145000  | 1.164300000  | 6                         | 0.858955000  | -2.495232000 | -1.484808000 |
| 6                       | 2.184240000  | -0.045063000 | 1.181455000  | 6                         | 1.921719000  | 0.133227000  | -1.608996000 |
| 6                       | 1.136848000  | -2.268472000 | 1.424554000  | 6                         | 0.789171000  | 2.319653000  | -1.691289000 |
| 6                       | 0.433183000  | -1.784657000 | 2.585280000  | 6                         | -0.048550000 | 1.824291000  | -2.748875000 |
| 6                       | 0.603458000  | -0.466950000 | 3.017493000  | 6                         | 0.109756000  | 0.519272000  | -3.224674000 |
| 6                       | 1.989374000  | -1.404796000 | 0.722016000  | 6                         | 1.781298000  | 1.494124000  | -1.135642000 |
| 17                      | -1.115567000 | 0.012062000  | 0.000009000  | 17                        | -1.163935000 | -0.045968000 | -0.006636000 |
| $(Cl^-@C_{60})Sc(CO)_4$ |              |              |              | $(Cl^-@C_{60})Ti(CO)_2Cl$ |              |              |              |
| 6                       | 0.861287000  | -1.911126000 | 2.300064000  | 6                         | 2.779966000  | 1.563158000  | -2.561494000 |
| 6                       | 1.579201000  | -0.665607000 | 2.307665000  | 6                         | 3.536933000  | 0.351539000  | -2.352452000 |
| 6                       | 0.884252000  | -2.734244000 | 1.168073000  | 6                         | 2.771650000  | 2.557695000  | -1.584002000 |
| 6                       | 2.316446000  | -0.274572000 | 1.176289000  | 6                         | 4.254895000  | 0.174457000  | -1.171612000 |
| 6                       | 2.264322000  | 1.099418000  | 0.721329000  | 6                         | 4.245441000  | -1.106730000 | -0.504911000 |
| 6                       | 0.795021000  | 0.306585000  | 3.018175000  | 6                         | 2.779323000  | -0.745198000 | -2.906862000 |
| 6                       | 0.757871000  | 1.637381000  | 2.586571000  | 6                         | 2.769790000  | -1.982225000 | -2.263003000 |
| 6                       | 1.503164000  | 2.046208000  | 1.425681000  | 6                         | 3.518598000  | -2.167051000 | -1.042040000 |
| 6                       | -1.513106000 | -3.190939000 | 1.419183000  | 6                         | 0.364726000  | 2.912486000  | -1.932370000 |
| 6                       | -1.537412000 | -2.339344000 | 2.589710000  | 6                         | 0.373815000  | 1.883235000  | -2.943302000 |
| 6                       | -0.325077000 | -3.394340000 | 0.723921000  | 6                         | 1.540410000  | 3.237882000  | -1.261243000 |
| 6                       | -0.373102000 | -1.716767000 | 3.030331000  | 6                         | 1.557919000  | 1.217824000  | -3.247560000 |
| 6                       | -0.413787000 | -0.344699000 | 3.474621000  | 6                         | 1.557641000  | -0.213541000 | -3.461773000 |
| 6                       | -2.788525000 | -1.618237000 | 2.587704000  | 6                         | -0.856531000 | 1.131596000  | -2.823950000 |
| 6                       | -2.827547000 | -0.292549000 | 3.017501000  | 6                         | -0.856685000 | -0.254049000 | -3.030916000 |
| 6                       | -1.616504000 | 0.355488000  | 3.463495000  | 6                         | 0.373208000  | -0.938262000 | -3.365032000 |
| 6                       | -1.512882000 | -3.193045000 | -1.414552000 | 6                         | 0.336942000  | 3.380828000  | 0.881409000  |
| 6                       | -2.748934000 | -2.992862000 | -0.694992000 | 6                         | -0.883556000 | 3.021992000  | 0.191608000  |
| 6                       | -0.324966000 | -3.395413000 | -0.718782000 | 6                         | 1.526181000  | 3.476684000  | 0.166196000  |
| 6                       | -2.749031000 | -2.991811000 | 0.699135000  | 6                         | -0.871063000 | 2.793935000  | -1.189905000 |
| 6                       | -3.537414000 | -2.021161000 | 1.420672000  | 6                         | -1.625786000 | 1.708252000  | -1.756273000 |
| 6                       | -3.537191000 | -2.023261000 | -1.418083000 | 6                         | -1.652175000 | 2.177294000  | 1.061666000  |
| 6                       | -4.296115000 | -1.084659000 | -0.721649000 | 6                         | -2.405523000 | 1.117814000  | 0.518957000  |
| 6                       | -4.296224000 | -1.083588000 | 0.722727000  | 6                         | -2.357656000 | 0.862866000  | -0.905523000 |
| 6                       | 0.861663000  | -1.914537000 | -2.296924000 | 6                         | 2.733148000  | 2.319970000  | 1.965909000  |
| 6                       | -0.372623000 | -1.721253000 | -3.027660000 | 6                         | 1.494933000  | 2.211352000  | 2.700352000  |
| 6                       | 0.884412000  | -2.735950000 | -1.163698000 | 6                         | 2.748657000  | 2.942503000  | 0.718524000  |
| 6                       | -1.537008000 | -2.343209000 | -2.586361000 | 6                         | 0.320124000  | 2.738213000  | 2.172593000  |
| 6                       | -2.788114000 | -1.622070000 | -2.585600000 | 6                         | -0.910755000 | 1.983451000  | 2.276760000  |
| 6                       | -0.413227000 | -0.349850000 | -3.473999000 | 6                         | 1.486226000  | 0.927207000  | 3.369709000  |
| 6                       | -1.615945000 | 0.350353000  | -3.464119000 | 6                         | 0.302931000  | 0.206630000  | 3.490859000  |
| 6                       | -2.827073000 | -0.297023000 | -3.017368000 | 6                         | -0.918384000 | 0.739936000  | 2.923235000  |
| 6                       | 2.346784000  | -1.135018000 | 0.001137000  | 6                         | 4.246082000  | 1.204386000  | -0.159128000 |
| 6                       | 2.316678000  | -0.276322000 | -1.175324000 | 6                         | 4.230707000  | 0.559754000  | 1.133234000  |
| 6                       | 1.625695000  | -2.342608000 | 0.001963000  | 6                         | 3.519938000  | 2.375967000  | -0.362379000 |
| 6                       | 1.579539000  | -0.669018000 | -2.306201000 | 6                         | 3.489554000  | 1.108669000  | 2.177964000  |
| 6                       | 0.795497000  | 0.302111000  | -3.018302000 | 6                         | 2.718828000  | 0.248911000  | 3.044154000  |
| 6                       | 2.264477000  | 1.098363000  | -0.722382000 | 6                         | 4.230343000  | -0.868436000 | 0.919508000  |
| 6                       | 1.503384000  | 2.044075000  | -1.428262000 | 6                         | 3.489117000  | -1.698868000 | 1.757816000  |

|                                                      |              |              |              |                                                       |              |              |              |
|------------------------------------------------------|--------------|--------------|--------------|-------------------------------------------------------|--------------|--------------|--------------|
| 6                                                    | 0.758303000  | 1.633550000  | -2.588680000 | 6                                                     | 2.718635000  | -1.129928000 | 2.837794000  |
| 6                                                    | -2.890879000 | 1.923370000  | -2.296927000 | 6                                                     | -0.918999000 | -1.562599000 | 2.578929000  |
| 6                                                    | -1.655408000 | 1.726261000  | -3.017390000 | 6                                                     | 0.302751000  | -1.219404000 | 3.277455000  |
| 6                                                    | -0.491126000 | 2.362632000  | -2.595615000 | 6                                                     | 1.485720000  | -1.873459000 | 2.950629000  |
| 6                                                    | -2.915000000 | 2.743439000  | -1.169650000 | 6                                                     | -0.912074000 | -2.562095000 | 1.596639000  |
| 6                                                    | -4.360806000 | 1.137588000  | -0.001117000 | 6                                                     | -2.406810000 | -1.218833000 | 0.169500000  |
| 6                                                    | -4.336061000 | 0.288001000  | -1.168927000 | 6                                                     | -2.425705000 | -0.178587000 | 1.201254000  |
| 6                                                    | -3.616008000 | 0.674701000  | -2.297457000 | 6                                                     | -1.667007000 | -0.355608000 | 2.381266000  |
| 6                                                    | -3.664584000 | 2.344433000  | -0.001943000 | 6                                                     | -1.653130000 | -2.390847000 | 0.378167000  |
| 6                                                    | -2.891280000 | 1.926783000  | 2.293816000  | 6                                                     | -0.872607000 | -2.321959000 | -1.955387000 |
| 6                                                    | -3.616385000 | 0.678103000  | 2.296039000  | 6                                                     | -1.626456000 | -1.117692000 | -2.179026000 |
| 6                                                    | -4.336244000 | 0.289730000  | 1.167960000  | 6                                                     | -2.358746000 | -0.558105000 | -1.118218000 |
| 6                                                    | -2.915176000 | 2.745156000  | 1.165302000  | 6                                                     | -0.884954000 | -2.944211000 | -0.701071000 |
| 6                                                    | -0.516373000 | 3.213006000  | 1.423597000  | 6                                                     | 1.524380000  | -3.373781000 | -0.858671000 |
| 6                                                    | -0.491546000 | 2.366493000  | 2.592244000  | 6                                                     | 1.538765000  | -2.727085000 | -2.153651000 |
| 6                                                    | -1.655904000 | 1.730736000  | 3.014744000  | 6                                                     | 0.363384000  | -2.218315000 | -2.699730000 |
| 6                                                    | -1.704370000 | 3.393774000  | 0.720864000  | 6                                                     | 0.335129000  | -3.490048000 | -0.146606000 |
| 6                                                    | -0.516145000 | 3.210872000  | -1.428227000 | 6                                                     | 1.493964000  | -2.905953000 | 1.935068000  |
| 6                                                    | 0.717492000  | 3.004925000  | -0.701760000 | 6                                                     | 2.732102000  | -2.795226000 | 1.200797000  |
| 6                                                    | 0.717398000  | 3.005999000  | 0.697634000  | 6                                                     | 2.747334000  | -3.025243000 | -0.174267000 |
| 6                                                    | -1.704257000 | 3.392704000  | -0.725969000 | 6                                                     | 0.318787000  | -3.253486000 | 1.275897000  |
| 21                                                   | 4.509857000  | 0.012716000  | 0.000000000  | 17                                                    | 0.875057000  | -0.002391000 | 0.007106000  |
| 17                                                   | -0.961384000 | 0.005619000  | -0.000155000 | 22                                                    | -4.436033000 | -0.043869000 | 0.297105000  |
| 6                                                    | 5.109179000  | 1.521694000  | -1.568358000 | 17                                                    | -6.123996000 | -0.253987000 | 1.719687000  |
| 8                                                    | 5.338312000  | 2.300096000  | -2.387118000 | 8                                                     | -5.441100000 | -2.051387000 | -2.010518000 |
| 6                                                    | 4.962424000  | -1.577815000 | 1.530372000  | 8                                                     | -5.441312000 | 2.544677000  | -1.332481000 |
| 8                                                    | 5.046011000  | -2.414838000 | 2.318826000  | 6                                                     | -5.073578000 | -1.316726000 | -1.198418000 |
| 6                                                    | 4.962618000  | -1.581245000 | -1.526723000 | 6                                                     | -5.073467000 | 1.606605000  | -0.767709000 |
| 8                                                    | 5.046221000  | -2.420010000 | -2.313320000 |                                                       |              |              |              |
| 6                                                    | 5.109353000  | 1.525317000  | 1.564796000  |                                                       |              |              |              |
| 8                                                    | 5.338695000  | 2.305598000  | 2.381708000  |                                                       |              |              |              |
| (Cl <sup>-</sup> @C <sub>60</sub> )TiCl <sub>3</sub> |              |              |              | (Cl <sup>-</sup> @C <sub>60</sub> )V(CO) <sub>2</sub> |              |              |              |
| 22                                                   | 4.461259000  | 0.000588000  | -0.000840000 | 6                                                     | 1.122753000  | -2.394650000 | 1.833505000  |
| 17                                                   | 5.374052000  | -0.810947000 | 1.834769000  | 6                                                     | 1.929124000  | -1.219864000 | 2.018693000  |
| 17                                                   | 5.371528000  | -1.189726000 | -1.617880000 | 6                                                     | 1.042711000  | -3.009495000 | 0.579900000  |
| 17                                                   | 5.355952000  | 2.005088000  | -0.217960000 | 6                                                     | 2.656217000  | -0.686795000 | 0.930642000  |
| 6                                                    | -1.569537000 | -3.061621000 | 1.663150000  | 6                                                     | 2.700517000  | 0.769961000  | 0.735814000  |
| 6                                                    | -1.571145000 | -2.121504000 | 2.763718000  | 6                                                     | 1.240290000  | -0.339900000 | 2.921438000  |
| 6                                                    | -0.387307000 | -3.352537000 | 0.988005000  | 6                                                     | 1.265230000  | 1.047121000  | 2.720188000  |
| 6                                                    | -0.390608000 | -1.499139000 | 3.158876000  | 6                                                     | 1.983523000  | 1.609499000  | 1.615146000  |
| 6                                                    | -0.393502000 | -0.095418000 | 3.495299000  | 6                                                     | -1.366159000 | -3.362271000 | 0.878447000  |
| 6                                                    | -2.801625000 | -1.369368000 | 2.702973000  | 6                                                     | -1.283722000 | -2.727674000 | 2.175934000  |
| 6                                                    | -2.804096000 | -0.013317000 | 3.027972000  | 6                                                     | -0.225030000 | -3.509290000 | 0.096004000  |
| 6                                                    | -1.576437000 | 0.634026000  | 3.424616000  | 6                                                     | -0.063773000 | -2.258459000 | 2.650881000  |
| 6                                                    | -1.571301000 | -3.284201000 | -1.161817000 | 6                                                     | 0.009000000  | -0.986874000 | 3.326858000  |
| 6                                                    | -2.799985000 | -2.994878000 | -0.461941000 | 6                                                     | -2.483118000 | -1.945885000 | 2.364183000  |
| 6                                                    | -0.388172000 | -3.465959000 | -0.450931000 | 6                                                     | -2.414191000 | -0.716132000 | 3.016443000  |
| 6                                                    | -2.799259000 | -2.885448000 | 0.928195000  | 6                                                     | -1.143830000 | -0.227832000 | 3.497955000  |
| 6                                                    | -3.562351000 | -1.841695000 | 1.570619000  | 6                                                     | -1.489345000 | -2.871057000 | -1.908862000 |
| 6                                                    | -3.563967000 | -2.064638000 | -1.259099000 | 6                                                     | -2.675848000 | -2.726713000 | -1.099095000 |
| 6                                                    | -4.296722000 | -1.054809000 | -0.639095000 | 6                                                     | -0.288237000 | -3.258719000 | -1.323642000 |
| 6                                                    | -4.295805000 | -0.941265000 | 0.800719000  | 6                                                     | -2.616177000 | -2.970117000 | 0.271423000  |
| 6                                                    | 0.833260000  | -2.145527000 | -2.139439000 | 6                                                     | -3.308984000 | -2.096805000 | 1.189858000  |
| 6                                                    | -0.394352000 | -1.975698000 | -2.885103000 | 6                                                     | -3.429488000 | -1.603318000 | -1.602622000 |
| 6                                                    | 0.837696000  | -2.878499000 | -0.945083000 | 6                                                     | -4.093672000 | -0.758944000 | -0.716493000 |
| 6                                                    | -1.574475000 | -2.528233000 | -2.396132000 | 6                                                     | -4.031981000 | -1.009523000 | 0.703973000  |
| 6                                                    | -2.804972000 | -1.775923000 | -2.452709000 | 6                                                     | 0.924615000  | -1.600103000 | -2.689610000 |
| 6                                                    | -0.397885000 | -0.642251000 | -3.437508000 | 6                                                     | -0.324662000 | -1.210138000 | -3.305242000 |
| 6                                                    | -1.580855000 | 0.089317000  | -3.481119000 | 6                                                     | 0.940577000  | -2.604845000 | -1.715352000 |
| 6                                                    | -2.808006000 | -0.487569000 | -2.986422000 | 6                                                     | -1.507172000 | -1.830911000 | -2.913776000 |
| 6                                                    | 2.317010000  | -1.218315000 | 0.094417000  | 6                                                     | -2.704877000 | -1.049154000 | -2.721008000 |
| 6                                                    | 2.299203000  | -0.461335000 | -1.135154000 | 6                                                     | -0.292666000 | 0.217895000  | -3.508975000 |

|                        |              |              |              |                        |              |              |              |
|------------------------|--------------|--------------|--------------|------------------------|--------------|--------------|--------------|
| 6                      | 1.593498000  | -2.419541000 | 0.189416000  | 6                      | -1.445210000 | 0.973357000  | -3.313949000 |
| 6                      | 1.586007000  | -0.926053000 | -2.250652000 | 6                      | -2.675424000 | 0.330478000  | -2.918828000 |
| 6                      | 0.827923000  | 0.010361000  | -3.032739000 | 6                      | 2.532157000  | -1.310215000 | -0.375951000 |
| 6                      | 2.304660000  | 0.938664000  | -0.800965000 | 6                      | 2.513649000  | -0.272204000 | -1.372267000 |
| 6                      | 1.582806000  | 1.854823000  | -1.583161000 | 6                      | 1.762405000  | -2.469230000 | -0.543400000 |
| 6                      | 0.826555000  | 1.373322000  | -2.706426000 | 6                      | 1.728576000  | -0.418022000 | -2.530826000 |
| 6                      | 0.836053000  | -1.783738000 | 2.447390000  | 6                      | 0.976732000  | 0.707905000  | -3.016999000 |
| 6                      | 1.588912000  | -0.562211000 | 2.365293000  | 6                      | 2.620063000  | 1.015826000  | -0.714957000 |
| 6                      | 0.839002000  | -2.694848000 | 1.382428000  | 6                      | 1.864142000  | 2.103278000  | -1.192132000 |
| 6                      | 2.300344000  | -0.278182000 | 1.189641000  | 6                      | 1.040365000  | 1.940931000  | -2.356222000 |
| 6                      | 2.307157000  | 1.052786000  | 0.640209000  | 6                      | -2.563597000 | 2.391832000  | -1.828654000 |
| 6                      | 0.831640000  | 0.485433000  | 2.991673000  | 6                      | -1.375563000 | 2.251046000  | -2.636722000 |
| 6                      | 0.830073000  | 1.780555000  | 2.455986000  | 6                      | -0.156394000 | 2.733680000  | -2.174081000 |
| 6                      | 1.584651000  | 2.079608000  | 1.269697000  | 6                      | -2.483192000 | 3.001174000  | -0.578303000 |
| 6                      | -0.403170000 | 3.070709000  | -1.673579000 | 6                      | -3.979847000 | 1.304019000  | 0.375608000  |
| 6                      | 0.825113000  | 2.889234000  | -0.931657000 | 6                      | -4.062479000 | 0.670517000  | -0.920006000 |
| 6                      | 0.826204000  | 2.999725000  | 0.465302000  | 6                      | -3.368753000 | 1.205879000  | -2.003085000 |
| 6                      | -1.585267000 | 3.338032000  | -0.988600000 | 6                      | -3.207037000 | 2.450399000  | 0.543063000  |
| 6                      | -2.811789000 | 1.782580000  | -2.441644000 | 6                      | -2.364510000 | 1.596211000  | 2.688261000  |
| 6                      | -1.583187000 | 1.497164000  | -3.143247000 | 6                      | -3.167629000 | 0.408963000  | 2.515256000  |
| 6                      | -0.402462000 | 2.133212000  | -2.770850000 | 6                      | -3.960490000 | 0.265653000  | 1.379284000  |
| 6                      | -2.812950000 | 2.688497000  | -1.381425000 | 6                      | -2.383529000 | 2.598196000  | 1.719820000  |
| 6                      | -4.301050000 | 1.217568000  | -0.093967000 | 6                      | 0.048815000  | 2.873505000  | 1.922283000  |
| 6                      | -4.299750000 | 0.279443000  | -1.191873000 | 6                      | 0.067923000  | 1.836792000  | 2.923309000  |
| 6                      | -3.570364000 | 0.557770000  | -2.345942000 | 6                      | -1.113685000 | 1.206228000  | 3.294577000  |
| 6                      | -3.572769000 | 2.401724000  | -0.187749000 | 6                      | -1.152008000 | 3.242741000  | 1.327606000  |
| 6                      | -2.808977000 | 2.143566000  | 2.134462000  | 6                      | -0.072860000 | 3.368156000  | -0.881843000 |
| 6                      | -3.567119000 | 0.918674000  | 2.232406000  | 6                      | 1.177435000  | 2.968232000  | -0.270717000 |
| 6                      | -4.298351000 | 0.463109000  | 1.137476000  | 6                      | 1.234522000  | 2.721434000  | 1.104710000  |
| 6                      | -2.811516000 | 2.872054000  | 0.945477000  | 6                      | -1.213945000 | 3.492871000  | -0.096607000 |
| 6                      | -0.401222000 | 3.295156000  | 1.171184000  | 23                     | 4.490451000  | -0.019853000 | -0.093688000 |
| 6                      | -0.399004000 | 2.541067000  | 2.401794000  | 17                     | -0.699003000 | -0.002839000 | 0.001523000  |
| 6                      | -1.579366000 | 1.971416000  | 2.870448000  | 6                      | 5.541172000  | 1.593783000  | 0.010695000  |
| 6                      | -1.584299000 | 3.451848000  | 0.454242000  | 8                      | 6.102880000  | 2.609422000  | 0.091055000  |
| 17                     | -0.928852000 | -0.000843000 | -0.000332000 | 6                      | 5.699137000  | -1.537674000 | 0.012394000  |
|                        |              |              |              | 8                      | 6.373030000  | -2.482370000 | 0.089617000  |
| $(Cl^-@C_{60})V(CO)_3$ |              |              |              | $(Cl^-@C_{60})V(CO)_4$ |              |              |              |
| 6                      | 0.932813000  | 3.020690000  | 0.015672000  | 6                      | 0.765905000  | 1.418306000  | -2.661226000 |
| 6                      | 1.557309000  | 2.312623000  | -1.070797000 | 6                      | 1.500880000  | 0.206281000  | -2.425498000 |
| 6                      | 1.097717000  | 2.583755000  | 1.334818000  | 6                      | 0.786835000  | 2.457381000  | -1.721493000 |
| 6                      | 2.341080000  | 1.173933000  | -0.803121000 | 6                      | 2.233643000  | 0.063679000  | -1.231435000 |
| 6                      | 2.209760000  | 0.000927000  | -1.633904000 | 6                      | 2.201082000  | -1.184978000 | -0.507850000 |
| 6                      | 0.649028000  | 2.299477000  | -2.183562000 | 6                      | 0.720190000  | -0.898788000 | -2.907331000 |
| 6                      | 0.544491000  | 1.168064000  | -3.000841000 | 6                      | 0.698762000  | -2.113362000 | -2.208980000 |
| 6                      | 1.347794000  | 0.001671000  | -2.741462000 | 6                      | 1.457436000  | -2.273380000 | -0.999061000 |
| 6                      | -1.267403000 | 3.013961000  | 1.808239000  | 6                      | -1.616273000 | 2.829790000  | -2.041656000 |
| 6                      | -1.442629000 | 3.463072000  | 0.443283000  | 6                      | -1.638787000 | 1.755198000  | -3.011658000 |
| 6                      | -0.020470000 | 2.592237000  | 2.254025000  | 6                      | -0.426687000 | 3.184107000  | -1.413621000 |
| 6                      | -0.364117000 | 3.475159000  | -0.435765000 | 6                      | -0.470896000 | 1.066783000  | -3.325941000 |
| 6                      | -0.540361000 | 3.027582000  | -1.795909000 | 6                      | -0.499207000 | -0.367242000 | -3.477978000 |
| 6                      | -2.740338000 | 3.018364000  | -0.005642000 | 6                      | -2.881923000 | 1.039076000  | -2.850909000 |
| 6                      | -2.907742000 | 2.586880000  | -1.319860000 | 6                      | -2.909012000 | -0.347153000 | -2.998438000 |
| 6                      | -1.786244000 | 2.588869000  | -2.229156000 | 6                      | -1.693729000 | -1.060851000 | -3.311465000 |
| 6                      | -1.054111000 | 0.722092000  | 3.457013000  | 6                      | -1.598477000 | 3.415036000  | 0.729661000  |
| 6                      | -2.352166000 | 1.165653000  | 3.007669000  | 6                      | -2.836968000 | 3.060079000  | 0.077609000  |
| 6                      | 0.089312000  | 1.424714000  | 3.093607000  | 6                      | -0.417529000 | 3.482564000  | -0.002680000 |
| 6                      | -2.457520000 | 2.294171000  | 2.197077000  | 6                      | -2.845766000 | 2.772238000  | -1.286553000 |
| 6                      | -3.367907000 | 2.296501000  | 1.076628000  | 6                      | -3.628518000 | 1.666846000  | -1.786271000 |
| 6                      | -3.156198000 | -0.001673000 | 2.730323000  | 6                      | -3.611532000 | 2.253820000  | 0.991285000  |
| 6                      | -4.030173000 | -0.000917000 | 1.645591000  | 6                      | -4.363228000 | 1.184232000  | 0.508882000  |
| 6                      | -4.139918000 | 1.168702000  | 0.805486000  | 6                      | -4.372337000 | 0.886026000  | -0.904105000 |
| 6                      | 1.275192000  | -0.702573000 | 2.688999000  | 6                      | 0.794176000  | 2.367844000  | 1.837273000  |

|                           |              |              |              |                          |              |              |              |
|---------------------------|--------------|--------------|--------------|--------------------------|--------------|--------------|--------------|
| 6                         | 0.089188000  | -1.428906000 | 3.091726000  | 6                        | -0.433320000 | 2.318481000  | 2.602954000  |
| 6                         | 1.275258000  | 0.698789000  | 2.689931000  | 6                        | 0.801797000  | 2.939294000  | 0.557904000  |
| 6                         | -1.054174000 | -0.726635000 | 3.456070000  | 6                        | -1.606432000 | 2.824126000  | 2.051395000  |
| 6                         | -2.352256000 | -1.169438000 | 3.006099000  | 6                        | -2.849881000 | 2.107524000  | 2.209101000  |
| 6                         | -0.020710000 | -2.595321000 | 2.250617000  | 6                        | -0.455898000 | 1.068361000  | 3.321849000  |
| 6                         | -1.267692000 | -3.016246000 | 1.804213000  | 6                        | -1.650357000 | 0.369761000  | 3.464411000  |
| 6                         | -2.457747000 | -2.296881000 | 2.194037000  | 6                        | -2.871461000 | 0.899449000  | 2.904762000  |
| 6                         | 2.520412000  | 0.728550000  | 0.569180000  | 6                        | 2.264782000  | 1.142369000  | -0.263347000 |
| 6                         | 2.520379000  | -0.729719000 | 0.568215000  | 6                        | 2.254390000  | 0.548753000  | 1.061587000  |
| 6                         | 1.897163000  | 1.426813000  | 1.622591000  | 6                        | 1.544141000  | 2.328255000  | -0.508670000 |
| 6                         | 1.897079000  | -1.429281000 | 1.620725000  | 6                        | 1.529029000  | 1.162216000  | 2.102173000  |
| 6                         | 1.097505000  | -2.585741000 | 1.331415000  | 6                        | 0.757754000  | 0.348523000  | 2.999164000  |
| 6                         | 2.340924000  | -1.173213000 | -0.804688000 | 6                        | 2.214869000  | -0.888855000 | 0.903128000  |
| 6                         | 1.557061000  | -2.311460000 | -1.073858000 | 6                        | 1.475262000  | -1.681830000 | 1.800283000  |
| 6                         | 0.932495000  | -3.020855000 | 0.011678000  | 6                        | 0.731690000  | -1.044756000 | 2.852310000  |
| 6                         | -2.740672000 | -3.018176000 | -0.009623000 | 6                        | -2.916105000 | -1.421821000 | 2.657741000  |
| 6                         | -1.442979000 | -3.463567000 | 0.438701000  | 6                        | -1.677996000 | -1.069469000 | 3.311123000  |
| 6                         | -0.364466000 | -3.474665000 | -0.440364000 | 6                        | -0.510177000 | -1.768635000 | 3.020846000  |
| 6                         | -2.907985000 | -2.584884000 | -1.323256000 | 6                        | -2.938034000 | -2.456299000 | 1.723144000  |
| 6                         | -4.314169000 | -0.721597000 | -0.557716000 | 6                        | -4.408475000 | -1.138903000 | 0.261655000  |
| 6                         | -4.140043000 | -1.169415000 | 0.803928000  | 6                        | -4.385509000 | -0.067131000 | 1.229439000  |
| 6                         | -3.368153000 | -2.297660000 | 1.073595000  | 6                        | -3.654526000 | -0.206629000 | 2.407289000  |
| 6                         | -3.711933000 | -1.418442000 | -1.602259000 | 6                        | -3.699548000 | -2.313427000 | 0.504972000  |
| 6                         | -3.083538000 | 0.699240000  | -2.680846000 | 6                        | -2.944772000 | -2.370093000 | -1.833778000 |
| 6                         | -3.711813000 | 1.420879000  | -1.600386000 | 6                        | -3.683478000 | -1.155602000 | -2.086834000 |
| 6                         | -4.314106000 | 0.722712000  | -0.556769000 | 6                        | -4.400245000 | -0.549733000 | -1.056998000 |
| 6                         | -3.083584000 | -0.695443000 | -2.681745000 | 6                        | -2.952832000 | -2.938928000 | -0.560658000 |
| 6                         | -0.752579000 | -0.719175000 | -3.460585000 | 6                        | -0.551345000 | -3.428373000 | -0.737871000 |
| 6                         | -0.752509000 | 0.723754000  | -3.459669000 | 6                        | -0.543089000 | -2.840066000 | -2.054963000 |
| 6                         | -1.895163000 | 1.418019000  | -3.072099000 | 6                        | -1.716016000 | -2.315236000 | -2.589360000 |
| 6                         | -1.895285000 | -1.413832000 | -3.073943000 | 6                        | -1.732179000 | -3.470993000 | -0.002781000 |
| 6                         | -0.540662000 | -3.025296000 | -1.799930000 | 6                        | -0.533417000 | -2.838852000 | 2.053926000  |
| 6                         | 0.648795000  | -2.296792000 | -2.186624000 | 6                        | 0.694260000  | -2.774551000 | 1.290187000  |
| 6                         | 0.544389000  | -1.164269000 | -3.002394000 | 6                        | 0.685505000  | -3.064396000 | -0.080672000 |
| 6                         | -1.786486000 | -2.585791000 | -2.232536000 | 6                        | -1.723016000 | -3.171534000 | 1.413278000  |
| 23                        | 4.346349000  | 0.000092000  | -0.466701000 | 23                       | 4.223263000  | -0.011307000 | -0.001081000 |
| 17                        | -0.879023000 | -0.000071000 | -0.001600000 | 17                       | -1.020708000 | 0.000625000  | -0.001310000 |
| 6                         | 5.443307000  | -1.594220000 | -0.566871000 | 6                        | 5.185369000  | -0.792312000 | 1.498581000  |
| 8                         | 6.078852000  | -2.565951000 | -0.582284000 | 8                        | 5.741964000  | -1.258231000 | 2.402186000  |
| 6                         | 5.443455000  | 1.594320000  | -0.566630000 | 6                        | 5.165477000  | 0.803508000  | -1.491450000 |
| 8                         | 6.079009000  | 2.566045000  | -0.582140000 | 8                        | 5.709553000  | 1.298171000  | -2.387631000 |
| 6                         | 5.246369000  | 0.000034000  | 1.221427000  | 6                        | 5.150413000  | 1.495587000  | 0.794760000  |
| 8                         | 5.780104000  | -0.000303000 | 2.254764000  | 8                        | 5.684552000  | 2.406293000  | 1.273783000  |
|                           |              |              |              | 6                        | 5.200661000  | -1.494039000 | -0.800922000 |
|                           |              |              |              | 8                        | 5.767057000  | -2.383008000 | -1.282609000 |
| $(Cl^-@C_{60})Cr(CO)_2Cl$ |              |              |              | $(Cl^-@C_{60})Cr(CO)_2H$ |              |              |              |
| 6                         | -2.519182000 | -3.085189000 | -0.696930000 | 6                        | -1.468779000 | 1.233627000  | 0.409958000  |
| 6                         | -3.353739000 | -2.156368000 | -1.419376000 | 6                        | -0.927038000 | 0.304906000  | 1.353577000  |
| 6                         | -2.519157000 | -3.085161000 | 0.697167000  | 6                        | -1.949434000 | -0.885743000 | -0.338826000 |
| 6                         | -4.158208000 | -1.257808000 | -0.722182000 | 6                        | -2.098235000 | 0.489810000  | -0.617599000 |
| 6                         | -4.265107000 | 0.111793000  | -1.168122000 | 6                        | -1.220063000 | -1.007453000 | 0.882353000  |
| 6                         | -2.623898000 | -1.716074000 | -2.586653000 | 24                       | 0.058809000  | -0.015164000 | -0.484412000 |
| 6                         | -2.729206000 | -0.394003000 | -3.017909000 | 1                        | 0.292754000  | -1.286827000 | -1.436611000 |
| 6                         | -3.566252000 | 0.535437000  | -2.297245000 | 8                        | 2.202659000  | -1.949275000 | 0.210918000  |
| 6                         | -0.078747000 | -3.366487000 | 0.721451000  | 8                        | 2.221185000  | 1.988076000  | 0.109384000  |
| 6                         | -0.078776000 | -3.366528000 | -0.721300000 | 6                        | 1.385644000  | -1.160818000 | -0.071053000 |
| 6                         | -1.273624000 | -3.220429000 | 1.416334000  | 6                        | 1.374440000  | 1.226917000  | -0.147403000 |
| 6                         | -1.273680000 | -3.220495000 | -1.416137000 | 1                        | -1.424381000 | 2.312043000  | 0.478244000  |
| 6                         | -1.339221000 | -2.371422000 | -2.588772000 | 1                        | -2.564770000 | 0.904954000  | -1.503317000 |
| 6                         | 1.092664000  | -2.640161000 | -1.164174000 | 1                        | -2.315280000 | -1.702018000 | -0.945752000 |
| 6                         | 1.036150000  | -1.822161000 | -2.301137000 | 1                        | -0.957730000 | -1.934354000 | 1.373767000  |
| 6                         | -0.207206000 | -1.692113000 | -3.030881000 | 1                        | -0.411972000 | 0.552265000  | 2.271103000  |

|                              |              |              |              |                              |             |              |              |
|------------------------------|--------------|--------------|--------------|------------------------------|-------------|--------------|--------------|
| 6                            | -0.207076000 | -1.691956000 | 3.030952000  |                              |             |              |              |
| 6                            | 1.036246000  | -1.822042000 | 2.301163000  |                              |             |              |              |
| 6                            | -1.339114000 | -2.371288000 | 2.588919000  |                              |             |              |              |
| 6                            | 1.092708000  | -2.640097000 | 1.164236000  |                              |             |              |              |
| 6                            | 1.814184000  | -2.217563000 | 0.000005000  |                              |             |              |              |
| 6                            | 1.696374000  | -0.546117000 | 2.315691000  |                              |             |              |              |
| 6                            | 2.412340000  | -0.110215000 | 1.172100000  |                              |             |              |              |
| 6                            | 2.456776000  | -0.966093000 | -0.000050000 |                              |             |              |              |
| 6                            | -2.729082000 | -0.393840000 | 3.018001000  |                              |             |              |              |
| 6                            | -1.552159000 | 0.312707000  | 3.463794000  |                              |             |              |              |
| 6                            | -2.623790000 | -1.715941000 | 2.586824000  |                              |             |              |              |
| 6                            | -0.315465000 | -0.325350000 | 3.475478000  |                              |             |              |              |
| 6                            | 0.861315000  | 0.384701000  | 3.018761000  |                              |             |              |              |
| 6                            | -1.661634000 | 1.683942000  | 3.014504000  |                              |             |              |              |
| 6                            | -0.530433000 | 2.378150000  | 2.592106000  |                              |             |              |              |
| 6                            | 0.751983000  | 1.714408000  | 2.584532000  |                              |             |              |              |
| 6                            | -4.158185000 | -1.257773000 | 0.722388000  |                              |             |              |              |
| 6                            | -4.265055000 | 0.111854000  | 1.168257000  |                              |             |              |              |
| 6                            | -3.353674000 | -2.156288000 | 1.419595000  |                              |             |              |              |
| 6                            | -3.566158000 | 0.535561000  | 2.297331000  |                              |             |              |              |
| 6                            | -2.905270000 | 1.818698000  | 2.296577000  |                              |             |              |              |
| 6                            | -4.333023000 | 0.957708000  | 0.000047000  |                              |             |              |              |
| 6                            | -3.698952000 | 2.198330000  | 0.000000000  |                              |             |              |              |
| 6                            | -2.968322000 | 2.634141000  | 1.165900000  |                              |             |              |              |
| 6                            | 0.645128000  | 3.089234000  | 0.699607000  |                              |             |              |              |
| 6                            | -0.598838000 | 3.225502000  | 1.424417000  |                              |             |              |              |
| 6                            | -1.794578000 | 3.348936000  | 0.722903000  |                              |             |              |              |
| 6                            | 0.645102000  | 3.089201000  | -0.699841000 |                              |             |              |              |
| 6                            | 2.263072000  | 1.257698000  | -0.717307000 |                              |             |              |              |
| 6                            | 2.263094000  | 1.257733000  | 0.717103000  |                              |             |              |              |
| 6                            | 1.478873000  | 2.171788000  | 1.428742000  |                              |             |              |              |
| 6                            | 1.478813000  | 2.171713000  | -1.428963000 |                              |             |              |              |
| 6                            | 0.861190000  | 0.384541000  | -3.018855000 |                              |             |              |              |
| 6                            | 1.696280000  | -0.546242000 | -2.315772000 |                              |             |              |              |
| 6                            | 2.412282000  | -0.110271000 | -1.172232000 |                              |             |              |              |
| 6                            | 0.751875000  | 1.714269000  | -2.584695000 |                              |             |              |              |
| 6                            | -1.661764000 | 1.683787000  | -3.014571000 |                              |             |              |              |
| 6                            | -1.552303000 | 0.312526000  | -3.463784000 |                              |             |              |              |
| 6                            | -0.315608000 | -0.325530000 | -3.475489000 |                              |             |              |              |
| 6                            | -0.530545000 | 2.378013000  | -2.592251000 |                              |             |              |              |
| 6                            | -1.794610000 | 3.348897000  | -0.723050000 |                              |             |              |              |
| 6                            | -2.968370000 | 2.634079000  | -1.165957000 |                              |             |              |              |
| 6                            | -2.905371000 | 1.818578000  | -2.296597000 |                              |             |              |              |
| 6                            | -0.598896000 | 3.225428000  | -1.424607000 |                              |             |              |              |
| 17                           | -0.881189000 | 0.000178000  | -0.000007000 |                              |             |              |              |
| 24                           | 4.285048000  | 0.187550000  | -0.000050000 |                              |             |              |              |
| 17                           | 5.585381000  | 1.944449000  | -0.000002000 |                              |             |              |              |
| 8                            | 5.754425000  | -1.624282000 | -1.870536000 |                              |             |              |              |
| 8                            | 5.754396000  | -1.624060000 | 1.870657000  |                              |             |              |              |
| 6                            | 5.177008000  | -0.913665000 | -1.156844000 |                              |             |              |              |
| 6                            | 5.176991000  | -0.913537000 | 1.156859000  |                              |             |              |              |
| $(Cl^-@C_{60})Mn(CO)_2NMe_3$ |              |              |              | $(Cl^-@C_{60})Mn(CO)_2PMe_3$ |             |              |              |
| 25                           | -3.989658000 | -0.434150000 | 0.000046000  | 25                           | 3.842905000 | -0.691943000 | -0.000059000 |
| 7                            | -5.334045000 | 1.215560000  | -0.000144000 | 15                           | 5.222046000 | 1.054412000  | -0.000178000 |
| 8                            | -5.438056000 | -1.866017000 | 2.102246000  | 8                            | 5.422056000 | -1.965114000 | -2.116008000 |
| 8                            | -5.437610000 | -1.866616000 | -2.102035000 | 8                            | 5.421880000 | -1.963881000 | 2.116746000  |
| 6                            | -4.872581000 | -1.289814000 | 1.257865000  | 6                            | 4.795668000 | -1.465562000 | -1.265932000 |
| 6                            | -4.872369000 | -1.290153000 | -1.257673000 | 6                            | 4.795501000 | -1.464823000 | 1.266369000  |
| 6                            | -6.743912000 | 0.769338000  | -0.000342000 | 6                            | 6.999918000 | 0.649242000  | -0.000813000 |
| 1                            | -6.940539000 | 0.166598000  | -0.888189000 | 1                            | 7.241062000 | 0.054128000  | 0.883404000  |
| 1                            | -6.940749000 | 0.166489000  | 0.887386000  | 1                            | 7.240581000 | 0.055106000  | -0.885816000 |
| 6                            | -5.119556000 | 2.046352000  | 1.203759000  | 6                            | 5.058119000 | 2.173853000  | -1.434674000 |



|   |              |              |              |   |              |              |              |
|---|--------------|--------------|--------------|---|--------------|--------------|--------------|
| 1 | -4.105422000 | 2.450494000  | 1.200151000  | 1 | 4.046570000  | 2.587782000  | -1.470120000 |
| 1 | -5.834234000 | 2.880911000  | 1.226906000  | 1 | 5.775480000  | 2.998221000  | -1.380467000 |
| 6 | -5.119251000 | 2.046446000  | -1.203929000 | 6 | 5.058784000  | 2.172814000  | 1.435212000  |
| 1 | -5.834039000 | 2.880906000  | -1.227270000 | 1 | 5.775884000  | 2.997420000  | 1.381183000  |
| 1 | -5.256487000 | 1.434491000  | -2.098053000 | 1 | 5.231911000  | 1.611962000  | 2.357239000  |
| 1 | -4.105181000 | 2.450739000  | -1.199948000 | 1 | 4.047137000  | 2.586443000  | 1.471609000  |
| 1 | -7.417351000 | 1.637597000  | -0.000369000 | 1 | 7.617736000  | 1.551750000  | -0.000489000 |
| 1 | -5.257189000 | 1.434365000  | 2.097802000  | 1 | 5.230536000  | 1.613648000  | -2.357219000 |
| 6 | 3.636023000  | 2.092030000  | -1.419484000 | 6 | -3.553131000 | 2.295161000  | 1.420082000  |
| 6 | 2.896823000  | 1.673154000  | -2.587662000 | 6 | -2.851041000 | 1.815524000  | 2.587432000  |
| 6 | 4.415361000  | 1.171163000  | -0.722059000 | 6 | -4.406393000 | 1.442611000  | 0.722319000  |
| 6 | 2.965760000  | 0.349840000  | -3.019312000 | 6 | -3.030228000 | 0.502343000  | 3.018478000  |
| 6 | 1.769357000  | -0.324705000 | -3.465386000 | 6 | -1.894094000 | -0.269455000 | 3.464429000  |
| 6 | 1.629710000  | 2.366599000  | -2.589250000 | 6 | -1.530276000 | 2.400039000  | 2.589120000  |
| 6 | 0.479865000  | 1.718154000  | -3.028732000 | 6 | -0.438602000 | 1.658818000  | 3.029859000  |
| 6 | 0.550094000  | 0.347720000  | -3.475253000 | 6 | -0.623808000 | 0.298844000  | 3.475245000  |
| 6 | 3.636083000  | 2.091370000  | 1.420151000  | 6 | -3.553113000 | 2.295492000  | -1.419620000 |
| 6 | 2.824111000  | 3.041553000  | 0.698287000  | 6 | -2.664583000 | 3.174190000  | -0.697024000 |
| 6 | 4.415466000  | 1.170866000  | 0.722299000  | 6 | -4.406387000 | 1.442783000  | -0.722058000 |
| 6 | 2.824052000  | 3.041841000  | -0.697115000 | 6 | -2.664589000 | 3.174017000  | 0.697688000  |
| 6 | 1.584822000  | 3.213904000  | -1.416580000 | 6 | -1.414946000 | 3.241408000  | 1.417114000  |
| 6 | 1.584933000  | 3.213301000  | 1.417942000  | 6 | -1.414927000 | 3.241732000  | -1.416420000 |
| 6 | 0.391676000  | 3.391571000  | 0.722187000  | 6 | -0.211655000 | 3.320917000  | -0.720800000 |
| 6 | 0.391615000  | 3.391900000  | -0.720655000 | 6 | -0.211665000 | 3.320763000  | 0.721533000  |
| 6 | 3.776242000  | -0.604926000 | 2.297135000  | 6 | -3.917258000 | -0.379677000 | -2.297236000 |
| 6 | 2.965996000  | 0.348528000  | 3.019277000  | 6 | -3.030177000 | 0.503014000  | -3.018383000 |
| 6 | 4.486538000  | -0.201072000 | 1.168460000  | 6 | -4.591808000 | 0.081740000  | -1.168602000 |
| 6 | 2.897025000  | 1.672033000  | 2.588243000  | 6 | -2.851006000 | 1.816108000  | -2.587064000 |
| 6 | 1.629910000  | 2.365473000  | 2.590231000  | 6 | -1.530231000 | 2.400612000  | -2.588604000 |
| 6 | 1.769635000  | -0.326199000 | 3.465157000  | 6 | -1.894040000 | -0.268686000 | -3.464483000 |
| 6 | 0.550373000  | 0.346227000  | 3.475492000  | 6 | -0.623756000 | 0.299612000  | -3.475201000 |
| 6 | 0.480102000  | 1.716868000  | 3.029568000  | 6 | -0.438549000 | 1.659500000  | -3.029526000 |
| 6 | 3.858510000  | -2.270144000 | -0.000601000 | 6 | -4.140204000 | -2.033466000 | -0.000251000 |
| 6 | 3.118531000  | -2.686117000 | 1.166928000  | 6 | -3.436760000 | -2.509433000 | -1.167753000 |
| 6 | 4.529230000  | -1.048530000 | -0.000368000 | 6 | -4.705326000 | -0.759405000 | -0.000110000 |
| 6 | 3.079783000  | -1.869409000 | 2.296233000  | 6 | -3.328827000 | -1.698097000 | -2.296659000 |
| 6 | 1.839755000  | -1.699473000 | 3.016034000  | 6 | -2.078650000 | -1.632008000 | -3.016001000 |
| 6 | 1.921427000  | -3.361117000 | 0.723607000  | 6 | -2.300516000 | -3.282880000 | -0.724474000 |
| 6 | 0.731122000  | -3.206793000 | 1.425414000  | 6 | -1.100926000 | -3.226929000 | -1.426008000 |
| 6 | 0.690089000  | -2.359787000 | 2.591617000  | 6 | -0.988211000 | -2.385982000 | -2.591693000 |
| 6 | 3.776037000  | -0.603923000 | -2.297609000 | 6 | -3.917293000 | -0.380188000 | 2.297113000  |
| 6 | 3.079593000  | -1.868412000 | -2.297204000 | 6 | -3.328865000 | -1.698606000 | 2.296252000  |
| 6 | 4.486460000  | -0.200565000 | -1.168835000 | 6 | -4.591821000 | 0.081477000  | 1.168567000  |
| 6 | 3.118428000  | -2.685603000 | -1.168240000 | 6 | -3.436777000 | -2.509687000 | 1.167153000  |
| 6 | 1.921365000  | -3.360799000 | -0.725111000 | 6 | -2.300531000 | -3.283042000 | 0.723719000  |
| 6 | 1.839501000  | -1.698163000 | -3.016813000 | 6 | -2.078706000 | -1.632686000 | 3.015652000  |
| 6 | 0.689873000  | -2.358675000 | -2.592600000 | 6 | -0.988257000 | -2.386546000 | 2.591153000  |
| 6 | 0.731005000  | -3.206174000 | -1.426760000 | 6 | -1.100950000 | -3.227234000 | 1.425280000  |
| 6 | -1.317693000 | -2.094007000 | 1.427519000  | 6 | 1.034820000  | -2.289205000 | -1.428564000 |
| 6 | -0.512718000 | -3.029788000 | 0.701281000  | 6 | 0.152322000  | -3.154850000 | -0.701465000 |
| 6 | -0.512775000 | -3.029474000 | -0.702442000 | 6 | 0.152304000  | -3.154999000 | 0.700763000  |
| 6 | -2.117571000 | -1.164090000 | 0.728099000  | 6 | 1.897035000  | -1.424773000 | -0.724327000 |
| 6 | -1.449542000 | 0.627306000  | 2.309501000  | 6 | 1.393871000  | 0.411401000  | -2.311484000 |
| 6 | -0.643983000 | -0.331299000 | 3.021220000  | 6 | 0.510162000  | -0.475193000 | -3.019937000 |
| 6 | -0.573769000 | -1.656971000 | 2.580343000  | 6 | 0.330719000  | -1.792113000 | -2.581562000 |
| 6 | -2.169076000 | 0.219323000  | 1.174104000  | 6 | 2.075909000  | -0.057850000 | -1.174574000 |
| 6 | -1.544126000 | 2.306376000  | 0.000625000  | 6 | 1.628716000  | 2.078949000  | 0.000246000  |
| 6 | -0.802215000 | 2.706467000  | 1.166661000  | 6 | 0.920982000  | 2.536575000  | -1.164547000 |
| 6 | -0.760308000 | 1.886697000  | 2.301886000  | 6 | 0.811949000  | 1.724095000  | -2.301675000 |
| 6 | -2.186446000 | 1.055021000  | 0.000378000  | 6 | 2.178027000  | 0.779810000  | 0.000093000  |
| 6 | -1.449720000 | 0.628287000  | -2.308988000 | 6 | 1.393833000  | 0.410903000  | 2.311575000  |
| 6 | -0.760485000 | 1.887678000  | -2.300882000 | 6 | 0.811908000  | 1.723585000  | 2.302053000  |
| 6 | -0.802307000 | 2.706960000  | -1.165310000 | 6 | 0.920970000  | 2.536326000  | 1.165123000  |
| 6 | -2.169204000 | 0.219831000  | -1.173726000 | 6 | 2.075867000  | -0.058106000 | 1.174563000  |

|                                                        |              |              |              |                                                           |              |              |              |
|--------------------------------------------------------|--------------|--------------|--------------|-----------------------------------------------------------|--------------|--------------|--------------|
| 6                                                      | -1.317829000 | -2.093405000 | -1.428220000 | 6                                                         | 1.034788000  | -2.289526000 | 1.428067000  |
| 6                                                      | -0.573987000 | -1.655855000 | -2.580899000 | 6                                                         | 0.330676000  | -1.792684000 | 2.581172000  |
| 6                                                      | -0.644245000 | -0.329999000 | -3.021215000 | 6                                                         | 0.510108000  | -0.475854000 | 3.019818000  |
| 6                                                      | -2.117611000 | -1.163768000 | -0.728309000 | 6                                                         | 1.897008000  | -1.424935000 | 0.724040000  |
| 17                                                     | 1.113074000  | 0.008090000  | 0.000008000  | 17                                                        | -1.209894000 | 0.010543000  | 0.000021000  |
| (Cl <sup>-</sup> @C <sub>60</sub> )Mn(CO) <sub>3</sub> |              |              |              | (Cl <sup>-</sup> @C <sub>60</sub> )Fe(CO) <sub>2</sub> Cl |              |              |              |
| 25                                                     | 4.253580000  | 0.005445000  | -0.003785000 | 6                                                         | 2.691210000  | 1.167798000  | -2.837403000 |
| 6                                                      | 5.240554000  | 1.483220000  | -0.192781000 | 6                                                         | 3.461861000  | 0.000259000  | -2.480760000 |
| 8                                                      | 5.855386000  | 2.457958000  | -0.317893000 | 6                                                         | 2.714145000  | 2.296693000  | -2.018326000 |
| 6                                                      | 5.244155000  | -0.569955000 | 1.366418000  | 6                                                         | 4.222898000  | 0.000061000  | -1.314158000 |
| 8                                                      | 5.865581000  | -0.952169000 | 2.267249000  | 6                                                         | 4.245277000  | -1.168806000 | -0.465655000 |
| 6                                                      | 5.249142000  | -0.907721000 | -1.173111000 | 6                                                         | 2.691111000  | -1.167104000 | -2.837731000 |
| 8                                                      | 5.873760000  | -1.515147000 | -1.937773000 | 6                                                         | 2.713955000  | -2.296250000 | -2.018991000 |
| 6                                                      | 2.393865000  | -0.384357000 | -1.167971000 | 6                                                         | 3.506888000  | -2.298146000 | -0.813204000 |
| 6                                                      | 2.397378000  | 0.992082000  | -0.735530000 | 6                                                         | 0.294953000  | 2.595763000  | -2.326847000 |
| 6                                                      | 2.404780000  | 1.006593000  | 0.713832000  | 6                                                         | 0.271883000  | 1.429460000  | -3.174605000 |
| 6                                                      | 2.390520000  | -0.364875000 | 1.165009000  | 6                                                         | 1.491657000  | 3.017160000  | -1.754586000 |
| 6                                                      | 2.409534000  | -1.230671000 | 0.007168000  | 6                                                         | 1.446246000  | 0.725411000  | -3.417419000 |
| 6                                                      | 1.670117000  | -2.430767000 | 0.018807000  | 6                                                         | 1.446192000  | -0.724449000 | -3.417628000 |
| 6                                                      | 0.913110000  | -2.803949000 | -1.143574000 | 6                                                         | -0.951399000 | 0.703674000  | -2.899034000 |
| 6                                                      | 0.909830000  | -1.986343000 | -2.281588000 | 6                                                         | -0.951445000 | -0.702662000 | -2.899231000 |
| 6                                                      | 1.670758000  | -0.767007000 | -2.315143000 | 6                                                         | 0.271772000  | -1.428480000 | -3.175031000 |
| 6                                                      | 0.910705000  | 0.221152000  | -3.024261000 | 6                                                         | 0.363867000  | 3.476672000  | 0.385891000  |
| 6                                                      | 0.909721000  | 1.559501000  | -2.602942000 | 6                                                         | -0.879002000 | 3.020057000  | -0.196578000 |
| 6                                                      | 1.666675000  | 1.960276000  | -1.453251000 | 6                                                         | 1.526964000  | 3.465429000  | -0.379010000 |
| 6                                                      | 0.905104000  | 2.939702000  | -0.726167000 | 6                                                         | -0.910659000 | 2.584758000  | -1.528036000 |
| 6                                                      | 0.906839000  | 2.952928000  | 0.674745000  | 6                                                         | -1.682202000 | 1.432502000  | -1.907965000 |
| 6                                                      | 1.666792000  | 1.982429000  | 1.414067000  | 6                                                         | -1.611562000 | 2.314813000  | 0.822404000  |
| 6                                                      | 0.914068000  | 1.602325000  | 2.574112000  | 6                                                         | -2.357619000 | 1.171384000  | 0.472757000  |
| 6                                                      | 0.914971000  | 0.270834000  | 3.014803000  | 6                                                         | -2.386269000 | 0.723931000  | -0.909018000 |
| 6                                                      | 1.676530000  | -0.730687000 | 2.323314000  | 6                                                         | 2.804092000  | 2.586913000  | 1.524598000  |
| 6                                                      | 0.915520000  | -1.948852000 | 2.311774000  | 6                                                         | 1.594401000  | 2.589438000  | 2.313333000  |
| 6                                                      | 0.917014000  | -2.786489000 | 1.187341000  | 6                                                         | 2.771967000  | 3.019606000  | 0.200203000  |
| 6                                                      | -0.312529000 | -3.413697000 | 0.748825000  | 6                                                         | 0.398676000  | 3.030445000  | 1.757137000  |
| 6                                                      | -0.314197000 | -3.425157000 | -0.693363000 | 6                                                         | -0.825957000 | 2.302736000  | 2.021023000  |
| 6                                                      | -1.496597000 | -3.194061000 | -1.389277000 | 6                                                         | 1.615334000  | 1.416201000  | 3.161521000  |
| 6                                                      | -1.498086000 | -2.351973000 | -2.566471000 | 6                                                         | 0.440065000  | 0.720906000  | 3.431633000  |
| 6                                                      | -0.317692000 | -1.766676000 | -3.014611000 | 6                                                         | -0.802963000 | 1.164484000  | 2.840867000  |
| 6                                                      | -0.318973000 | -0.399361000 | -3.472666000 | 6                                                         | 4.245371000  | 1.168676000  | -0.465315000 |
| 6                                                      | -1.500827000 | 0.334229000  | -3.464704000 | 6                                                         | 4.279565000  | 0.721775000  | 0.907355000  |
| 6                                                      | -1.502276000 | 1.715337000  | -3.028699000 | 6                                                         | 3.507081000  | 2.298180000  | -0.812537000 |
| 6                                                      | -0.321798000 | 2.322466000  | -2.613473000 | 6                                                         | 3.574113000  | 1.419630000  | 1.885426000  |
| 6                                                      | -0.322495000 | 3.178689000  | -1.452940000 | 6                                                         | 2.837199000  | 0.697628000  | 2.894397000  |
| 6                                                      | -1.503762000 | 3.398695000  | -0.750760000 | 6                                                         | 4.279504000  | -0.722306000 | 0.907146000  |
| 6                                                      | -1.502678000 | 3.411138000  | 0.696370000  | 6                                                         | 3.574000000  | -1.420387000 | 1.885014000  |
| 6                                                      | -0.320151000 | 3.202480000  | 1.399602000  | 6                                                         | 2.837140000  | -0.698614000 | 2.894191000  |
| 6                                                      | -0.317416000 | 2.365058000  | 2.573871000  | 6                                                         | -0.803060000 | -1.165158000 | 2.840533000  |
| 6                                                      | -1.497335000 | 1.765821000  | 3.001502000  | 6                                                         | 0.440006000  | -0.721855000 | 3.431430000  |
| 6                                                      | -1.494660000 | 0.392047000  | 3.459001000  | 6                                                         | 1.615221000  | -1.417162000 | 3.161100000  |
| 6                                                      | -0.312572000 | -0.341601000 | 3.477437000  | 6                                                         | -0.826135000 | -2.303152000 | 2.020343000  |
| 6                                                      | -0.311536000 | -1.716599000 | 3.042807000  | 6                                                         | -2.357702000 | -1.171219000 | 0.472410000  |
| 6                                                      | -1.492500000 | -2.309262000 | 2.605911000  | 6                                                         | -2.297447000 | -0.000042000 | 1.305957000  |
| 6                                                      | -1.493397000 | -3.171197000 | 1.442625000  | 6                                                         | -1.575105000 | -0.000250000 | 2.506483000  |
| 6                                                      | -2.724150000 | -2.942753000 | 0.722675000  | 6                                                         | -1.611740000 | -2.314816000 | 0.821718000  |
| 6                                                      | -2.725948000 | -2.954480000 | -0.671070000 | 6                                                         | -0.910862000 | -2.584139000 | -1.528784000 |
| 6                                                      | -3.487851000 | -1.968414000 | -1.400626000 | 6                                                         | -1.682309000 | -1.431717000 | -1.908382000 |
| 6                                                      | -2.728563000 | -1.597418000 | -2.570882000 | 6                                                         | -2.386276000 | -0.723346000 | -0.909224000 |
| 6                                                      | -2.729261000 | -0.274499000 | -3.011886000 | 6                                                         | -0.879247000 | -3.019836000 | -0.197458000 |
| 6                                                      | -3.491441000 | 0.723957000  | -2.300171000 | 6                                                         | 1.526683000  | -3.465380000 | -0.380021000 |
| 6                                                      | -2.731395000 | 1.951245000  | -2.308780000 | 6                                                         | 1.491414000  | -3.016712000 | -1.755476000 |
| 6                                                      | -2.733072000 | 2.781321000  | -1.188438000 | 6                                                         | 0.294745000  | -2.595031000 | -2.327612000 |
| 6                                                      | -3.492463000 | 2.411994000  | -0.017429000 | 6                                                         | 0.363584000  | -3.476725000 | 0.384878000  |

|                           |              |              |              |                          |              |              |              |
|---------------------------|--------------|--------------|--------------|--------------------------|--------------|--------------|--------------|
| 6                         | -2.731371000 | 2.801012000  | 1.146326000  | 6                        | 1.594195000  | -2.590155000 | 2.312578000  |
| 6                         | -2.727939000 | 1.989993000  | 2.280021000  | 6                        | 2.803881000  | -2.587507000 | 1.523846000  |
| 6                         | -3.487440000 | 0.761971000  | 2.292582000  | 6                        | 2.771720000  | -3.019816000 | 0.199325000  |
| 6                         | -2.723663000 | -0.224302000 | 3.018797000  | 6                        | 0.398433000  | -3.030891000 | 1.756247000  |
| 6                         | -2.722846000 | -1.554357000 | 2.599303000  | 17                       | 0.893586000  | -0.000037000 | -0.005026000 |
| 6                         | -3.485080000 | -1.945223000 | 1.437682000  | 26                       | -4.181935000 | 0.000090000  | -0.054839000 |
| 6                         | -4.217690000 | -0.991914000 | 0.733451000  | 17                       | -5.453953000 | -0.001053000 | 1.808635000  |
| 6                         | -4.219069000 | -1.003814000 | -0.710780000 | 8                        | -5.772338000 | -2.124302000 | -1.244494000 |
| 6                         | -4.220760000 | 0.366015000  | -1.168092000 | 8                        | -5.772622000 | 2.125478000  | -1.242380000 |
| 6                         | -4.221147000 | 1.224746000  | -0.006944000 | 6                        | -5.147051000 | -1.278906000 | -0.771883000 |
| 6                         | -4.219004000 | 0.385251000  | 1.168245000  | 6                        | -5.147221000 | 1.279708000  | -0.770595000 |
| 17                        | -0.850212000 | -0.002219000 | 0.000100000  |                          |              |              |              |
| $(Cl^-@C_{60})Fe(CO)_2Br$ |              |              |              | $(Cl^-@C_{60})CoCONMe_3$ |              |              |              |
| 6                         | 3.131862000  | -2.677396000 | -1.167248000 | 27                       | 4.006299000  | 0.459617000  | -0.000004000 |
| 6                         | 3.871526000  | -2.260071000 | -0.000023000 | 7                        | 5.461612000  | -0.941547000 | -0.000008000 |
| 6                         | 3.089324000  | -1.859828000 | -2.296573000 | 8                        | 5.723423000  | 2.770205000  | 0.000252000  |
| 6                         | 4.536257000  | -1.035942000 | 0.000040000  | 6                        | 5.042211000  | 1.825365000  | 0.000133000  |
| 6                         | 4.490641000  | -0.188312000 | 1.168834000  | 6                        | 6.837578000  | -0.399177000 | -0.000712000 |
| 6                         | 3.131803000  | -2.677494000 | 1.167123000  | 1                        | 6.989500000  | 0.216716000  | -0.888397000 |
| 6                         | 3.089208000  | -1.860022000 | 2.296515000  | 1                        | 6.990201000  | 0.217306000  | 0.886444000  |
| 6                         | 3.782458000  | -0.594021000 | 2.297968000  | 6                        | 5.302901000  | -1.784464000 | 1.207320000  |
| 6                         | 0.702407000  | -2.361107000 | -2.595442000 | 1                        | 4.323584000  | -2.265553000 | 1.194923000  |
| 6                         | 0.747437000  | -3.207941000 | -1.429091000 | 1                        | 6.084361000  | -2.556572000 | 1.235860000  |
| 6                         | 1.849448000  | -1.694797000 | -3.016778000 | 6                        | 5.302164000  | -1.785518000 | -1.206523000 |
| 6                         | 1.937491000  | -3.355793000 | -0.724940000 | 1                        | 6.083703000  | -2.557552000 | -1.234912000 |
| 6                         | 1.937453000  | -3.355841000 | 0.724688000  | 1                        | 5.380065000  | -1.161276000 | -2.098535000 |
| 6                         | -0.494162000 | -3.031904000 | -0.703175000 | 1                        | 4.322932000  | -2.266737000 | -1.193072000 |
| 6                         | -0.494178000 | -3.031936000 | 0.702831000  | 1                        | 7.566523000  | -1.220749000 | -0.000707000 |
| 6                         | 0.747363000  | -3.208079000 | 1.428807000  | 1                        | 5.381456000  | -1.159452000 | 2.098737000  |
| 6                         | 0.553434000  | 0.348220000  | -3.476183000 | 6                        | -3.428032000 | -2.157858000 | -1.418900000 |
| 6                         | -0.638740000 | -0.332241000 | -3.019770000 | 6                        | -2.702925000 | -1.718847000 | -2.587586000 |
| 6                         | 1.774305000  | -0.321018000 | -3.465057000 | 6                        | -4.231805000 | -1.258691000 | -0.721364000 |
| 6                         | -0.563582000 | -1.662000000 | -2.584600000 | 6                        | -2.807259000 | -0.398709000 | -3.018207000 |
| 6                         | -1.302408000 | -2.102848000 | -1.432168000 | 6                        | -1.630869000 | 0.309894000  | -3.467695000 |
| 6                         | -1.451145000 | 0.624650000  | -2.315345000 | 6                        | -1.415350000 | -2.374436000 | -2.586828000 |
| 6                         | -2.164999000 | 0.215352000  | -1.171502000 | 6                        | -0.284810000 | -1.696280000 | -3.029647000 |
| 6                         | -2.083842000 | -1.163743000 | -0.723701000 | 6                        | -0.394241000 | -0.327103000 | -3.476856000 |
| 6                         | 2.894554000  | 1.679494000  | -2.587272000 | 6                        | -3.428130000 | -2.156881000 | 1.420401000  |
| 6                         | 1.625445000  | 2.368663000  | -2.590041000 | 6                        | -2.588374000 | -3.083591000 | 0.698988000  |
| 6                         | 2.968772000  | 0.356550000  | -3.019523000 | 6                        | -4.231857000 | -1.258192000 | 0.722192000  |
| 6                         | 0.478129000  | 1.717707000  | -3.030260000 | 6                        | -2.588328000 | -3.084081000 | -0.696814000 |
| 6                         | -0.763845000 | 1.882632000  | -2.302775000 | 6                        | -1.345738000 | -3.221598000 | -1.415839000 |
| 6                         | 1.578288000  | 3.215989000  | -1.416846000 | 6                        | -1.345824000 | -3.220603000 | 1.418145000  |
| 6                         | 0.385277000  | 3.390230000  | -0.721155000 | 6                        | -0.147791000 | -3.363982000 | 0.722724000  |
| 6                         | -0.806792000 | 2.701697000  | -1.164623000 | 6                        | -0.147739000 | -3.364501000 | -0.720270000 |
| 6                         | 4.490711000  | -0.188208000 | -1.168682000 | 6                        | -3.643494000 | 0.534820000  | 2.297339000  |
| 6                         | 4.415313000  | 1.182995000  | -0.722022000 | 6                        | -2.807456000 | -0.396577000 | 3.018479000  |
| 6                         | 3.782565000  | -0.593816000 | -2.297874000 | 6                        | -4.340147000 | 0.111861000  | 1.168159000  |
| 6                         | 3.633009000  | 2.101044000  | -1.419701000 | 6                        | -2.703079000 | -1.717010000 | 2.588786000  |
| 6                         | 2.817617000  | 3.047451000  | -0.697854000 | 6                        | -1.415516000 | -2.372611000 | 2.588537000  |
| 6                         | 4.415274000  | 1.182927000  | 0.722293000  | 6                        | -1.631075000 | 0.312330000  | 3.467461000  |
| 6                         | 3.632943000  | 2.100924000  | 1.420005000  | 6                        | -0.394462000 | -0.324662000 | 3.477125000  |
| 6                         | 2.817588000  | 3.047399000  | 0.698201000  | 6                        | -0.285012000 | -1.694150000 | 3.030928000  |
| 6                         | -0.806836000 | 2.701584000  | 1.164743000  | 6                        | -3.766582000 | 2.195232000  | -0.000809000 |
| 6                         | 0.385243000  | 3.390171000  | 0.721395000  | 6                        | -3.040514000 | 2.633550000  | 1.167441000  |
| 6                         | 1.578219000  | 3.215867000  | 1.417137000  | 6                        | -4.406450000 | 0.958871000  | -0.000369000 |
| 6                         | -0.763956000 | 1.882447000  | 2.302837000  | 6                        | -2.978729000 | 1.816651000  | 2.295806000  |
| 6                         | -2.165055000 | 0.215243000  | 1.171329000  | 6                        | -1.737550000 | 1.683088000  | 3.020898000  |
| 6                         | -2.174556000 | 1.051411000  | -0.000047000 | 6                        | -1.861100000 | 3.335367000  | 0.723771000  |
| 6                         | -1.548461000 | 2.305672000  | 0.000030000  | 6                        | -0.667380000 | 3.212847000  | 1.425492000  |
| 6                         | -1.451190000 | 0.624441000  | 2.315188000  | 6                        | -0.603816000 | 2.371108000  | 2.593666000  |
| 6                         | -0.563724000 | -1.662241000 | 2.584389000  | 6                        | -3.643338000 | 0.533192000  | -2.297745000 |

|                            |              |              |              |                            |              |              |              |
|----------------------------|--------------|--------------|--------------|----------------------------|--------------|--------------|--------------|
| 6                          | -1.302492000 | -2.102981000 | 1.431867000  | 6                          | -2.978583000 | 1.815032000  | -2.297125000 |
| 6                          | -2.083911000 | -1.163828000 | 0.723415000  | 6                          | -4.340075000 | 0.111041000  | -1.168302000 |
| 6                          | -0.638863000 | -0.332501000 | 3.019615000  | 6                          | -3.040473000 | 2.632749000  | -1.169351000 |
| 6                          | 1.774134000  | -0.321311000 | 3.465057000  | 6                          | -1.861064000 | 3.334839000  | -0.726110000 |
| 6                          | 1.849291000  | -1.695059000 | 3.016691000  | 6                          | -1.737375000 | 1.680978000  | -3.022114000 |
| 6                          | 0.702274000  | -2.361322000 | 2.595212000  | 6                          | -0.603667000 | 2.369315000  | -2.595312000 |
| 6                          | 0.553261000  | 0.347929000  | 3.476203000  | 6                          | -0.667313000 | 3.211876000  | -1.427718000 |
| 6                          | 1.625307000  | 2.368413000  | 2.590241000  | 6                          | 1.415036000  | 2.165472000  | 1.432938000  |
| 6                          | 2.894421000  | 1.679274000  | 2.587504000  | 6                          | 0.581165000  | 3.070375000  | 0.703212000  |
| 6                          | 2.968624000  | 0.356292000  | 3.019649000  | 6                          | 0.581188000  | 3.069895000  | -0.705298000 |
| 6                          | 0.477971000  | 1.717468000  | 3.030416000  | 6                          | 2.226464000  | 1.247797000  | 0.730117000  |
| 17                         | 1.110268000  | 0.001848000  | -0.000042000 | 6                          | 1.614833000  | -0.552825000 | 2.316653000  |
| 26                         | -3.939360000 | -0.435248000 | -0.000031000 | 6                          | 0.779579000  | 0.386916000  | 3.025032000  |
| 35                         | -5.422803000 | 1.407865000  | 0.000033000  | 6                          | 0.681330000  | 1.709957000  | 2.591333000  |
| 8                          | -5.462608000 | -1.705184000 | 2.126605000  | 6                          | 2.302349000  | -0.122579000 | 1.179197000  |
| 8                          | -5.462802000 | -1.705225000 | -2.126519000 | 6                          | 1.757508000  | -2.229973000 | 0.000886000  |
| 6                          | -4.864404000 | -1.200502000 | 1.279211000  | 6                          | 1.029910000  | -2.652741000 | 1.167147000  |
| 6                          | -4.864476000 | -1.200532000 | -1.279218000 | 6                          | 0.957937000  | -1.827724000 | 2.300089000  |
|                            |              |              |              | 6                          | 2.381474000  | -0.960692000 | 0.000431000  |
|                            |              |              |              | 6                          | 1.614990000  | -0.554407000 | -2.316129000 |
|                            |              |              |              | 6                          | 0.958103000  | -1.829321000 | -2.298661000 |
|                            |              |              |              | 6                          | 1.029981000  | -2.653544000 | -1.165122000 |
|                            |              |              |              | 6                          | 2.302414000  | -0.123363000 | -1.178917000 |
|                            |              |              |              | 6                          | 1.415140000  | 2.164510000  | -1.434367000 |
|                            |              |              |              | 6                          | 0.681492000  | 1.708167000  | -2.592479000 |
|                            |              |              |              | 6                          | 0.779793000  | 0.384819000  | -3.025260000 |
|                            |              |              |              | 6                          | 2.226431000  | 1.247301000  | -0.730794000 |
|                            |              |              |              | 17                         | -0.993116000 | -0.005750000 | -0.000696000 |
| $(Cl^- @ C_{60})CoCOPEt_3$ |              |              |              | $(Cl^- @ C_{60})NiNET_3Cl$ |              |              |              |
| 27                         | 3.544865000  | 0.831124000  | -0.144759000 | 6                          | -3.166796000 | 0.322070000  | 3.030654000  |
| 8                          | 5.289176000  | 3.114908000  | -0.112691000 | 6                          | -2.038384000 | 1.196331000  | 3.260732000  |
| 6                          | 4.583312000  | 2.187802000  | -0.158508000 | 6                          | -2.981569000 | -1.057272000 | 2.979466000  |
| 6                          | -3.676559000 | -2.412526000 | -1.268839000 | 6                          | -0.766035000 | 0.658867000  | 3.436284000  |
| 6                          | -3.024936000 | -1.955919000 | -2.473862000 | 6                          | 0.368390000  | 1.289091000  | 2.798831000  |
| 6                          | -4.538230000 | -1.561951000 | -0.578964000 | 6                          | -2.220605000 | 2.382270000  | 2.455795000  |
| 6                          | -3.259392000 | -0.666617000 | -2.947541000 | 6                          | -1.124203000 | 2.993315000  | 1.849335000  |
| 6                          | -2.163342000 | 0.125960000  | -3.456538000 | 6                          | 0.197669000  | 2.437978000  | 2.023991000  |
| 6                          | -1.684623000 | -2.494517000 | -2.488703000 | 6                          | -4.514426000 | -1.217680000 | 1.066779000  |
| 6                          | -0.631795000 | -1.734814000 | -2.988660000 | 6                          | -4.708472000 | 0.212285000  | 1.120983000  |
| 6                          | -0.875200000 | -0.399939000 | -3.481072000 | 6                          | -3.667602000 | -1.841733000 | 1.980041000  |
| 6                          | -3.598467000 | -2.303002000 | 1.568186000  | 6                          | -4.048022000 | 0.968791000  | 2.086666000  |
| 6                          | -2.700111000 | -3.179513000 | 0.854107000  | 6                          | -3.458621000 | 2.236717000  | 1.728357000  |
| 6                          | -4.498908000 | -1.506509000 | 0.863473000  | 6                          | -4.813686000 | 0.700296000  | -0.234579000 |
| 6                          | -2.738651000 | -3.233560000 | -0.539848000 | 6                          | -4.251227000 | 1.927440000  | -0.579409000 |
| 6                          | -1.507925000 | -3.287671000 | -1.290688000 | 6                          | -3.560800000 | 2.709998000  | 0.418608000  |
| 6                          | -1.430087000 | -3.177614000 | 1.538426000  | 6                          | -2.754525000 | -3.262581000 | 0.188937000  |
| 6                          | -0.243491000 | -3.241415000 | 0.812842000  | 6                          | -3.640777000 | -2.621209000 | -0.753710000 |
| 6                          | -0.283406000 | -3.296899000 | -0.627404000 | 6                          | -2.767459000 | -2.878728000 | 1.533609000  |
| 6                          | -4.030499000 | 0.390720000  | 2.354900000  | 6                          | -4.501093000 | -1.613951000 | -0.322632000 |
| 6                          | -3.094428000 | -0.434170000 | 3.082374000  | 6                          | -4.687617000 | -0.428878000 | -1.126639000 |
| 6                          | -4.718139000 | -0.135661000 | 1.263351000  | 6                          | -2.933361000 | -2.479324000 | -2.004441000 |
| 6                          | -2.883434000 | -1.756780000 | 2.697585000  | 6                          | -3.110548000 | -1.334711000 | -2.778710000 |
| 6                          | -1.542820000 | -2.294267000 | 2.680034000  | 6                          | -4.006248000 | -0.292406000 | -2.334289000 |
| 6                          | -1.974521000 | 0.392810000  | 3.469447000  | 6                          | -0.315381000 | -3.000216000 | 1.615853000  |
| 6                          | -0.685644000 | -0.132491000 | 3.463938000  | 6                          | -0.301934000 | -3.395638000 | 0.228060000  |
| 6                          | -0.465848000 | -1.501418000 | 3.062990000  | 6                          | -1.528107000 | -2.743003000 | 2.254048000  |
| 6                          | -4.369529000 | 1.946332000  | 0.004307000  | 6                          | -1.501453000 | -3.518888000 | -0.471620000 |
| 6                          | -3.652617000 | 2.490835000  | 1.133257000  | 6                          | -1.609500000 | -3.029793000 | -1.830940000 |
| 6                          | -4.892310000 | 0.655957000  | 0.068035000  | 6                          | 0.836523000  | -2.767574000 | -0.401785000 |
| 6                          | -3.485217000 | 1.726208000  | 2.287490000  | 6                          | 0.723503000  | -2.284846000 | -1.718572000 |
| 6                          | -2.216636000 | 1.730523000  | 2.977233000  | 6                          | -0.516479000 | -2.433166000 | -2.450981000 |
| 6                          | -2.553871000 | 3.278868000  | 0.628512000  | 6                          | -0.573054000 | -0.771703000 | 3.378971000  |

|                                                          |              |              |              |                                                       |              |              |              |
|----------------------------------------------------------|--------------|--------------|--------------|-------------------------------------------------------|--------------|--------------|--------------|
| 6                                                        | -1.334333000 | 3.289360000  | 1.297406000  | 6                                                     | 0.679868000  | -1.026834000 | 2.700980000  |
| 6                                                        | -1.162286000 | 2.501045000  | 2.492734000  | 6                                                     | -1.657871000 | -1.611345000 | 3.147444000  |
| 6                                                        | -4.155260000 | 0.213939000  | -2.235229000 | 6                                                     | 0.814897000  | -2.129638000 | 1.841463000  |
| 6                                                        | -3.609723000 | 1.549240000  | -2.299864000 | 6                                                     | 1.527390000  | -2.001834000 | 0.598215000  |
| 6                                                        | -4.781601000 | -0.225426000 | -1.070640000 | 6                                                     | 1.262169000  | 0.241594000  | 2.366030000  |
| 6                                                        | -3.715736000 | 2.400862000  | -1.200265000 | 6                                                     | 1.922148000  | 0.378794000  | 1.145291000  |
| 6                                                        | -2.593110000 | 3.223269000  | -0.818644000 | 6                                                     | 2.076428000  | -0.744643000 | 0.245578000  |
| 6                                                        | -2.380608000 | 1.498063000  | -3.055647000 | 6                                                     | 0.424905000  | -0.373417000 | -3.031022000 |
| 6                                                        | -1.302979000 | 2.301552000  | -2.690486000 | 6                                                     | 1.305882000  | -1.030098000 | -2.093064000 |
| 6                                                        | -1.411327000 | 3.178950000  | -1.551383000 | 6                                                     | 1.948620000  | -0.264241000 | -1.117099000 |
| 6                                                        | 0.832003000  | 2.426018000  | 1.278441000  | 6                                                     | 0.243652000  | 1.008889000  | -2.980088000 |
| 6                                                        | -0.099580000 | 3.227587000  | 0.541955000  | 6                                                     | -2.165752000 | 0.722878000  | -3.361921000 |
| 6                                                        | -0.137140000 | 3.173831000  | -0.862439000 | 6                                                     | -1.974638000 | -0.707983000 | -3.416571000 |
| 6                                                        | 1.696869000  | 1.558977000  | 0.581595000  | 6                                                     | -0.701521000 | -1.250191000 | -3.258612000 |
| 6                                                        | 1.304782000  | -0.222350000 | 2.251611000  | 6                                                     | -1.077664000 | 1.567460000  | -3.148843000 |
| 6                                                        | 0.408001000  | 0.662721000  | 2.950212000  | 6                                                     | -2.408239000 | 2.931805000  | -1.602157000 |
| 6                                                        | 0.176932000  | 1.955823000  | 2.474650000  | 6                                                     | -3.540394000 | 2.069062000  | -1.828252000 |
| 6                                                        | 1.929557000  | 0.224038000  | 1.079226000  | 6                                                     | -3.417603000 | 0.977110000  | -2.688722000 |
| 6                                                        | 1.532703000  | -1.968715000 | -0.006496000 | 6                                                     | -1.201865000 | 2.692537000  | -2.253284000 |
| 6                                                        | 0.877749000  | -2.408314000 | 1.193969000  | 6                                                     | 0.030408000  | 3.211813000  | -0.170230000 |
| 6                                                        | 0.764368000  | -1.550348000 | 2.299780000  | 6                                                     | -1.227085000 | 3.475726000  | 0.492972000  |
| 6                                                        | 2.063053000  | -0.655040000 | -0.072830000 | 6                                                     | -2.421210000 | 3.330017000  | -0.207703000 |
| 6                                                        | 1.177566000  | -0.399847000 | -2.375022000 | 6                                                     | 0.042148000  | 2.824006000  | -1.527001000 |
| 6                                                        | 0.636454000  | -1.727554000 | -2.290759000 | 6                                                     | 1.766725000  | 1.161133000  | -1.058325000 |
| 6                                                        | 0.812405000  | -2.497943000 | -1.132081000 | 6                                                     | 1.756721000  | 1.558312000  | 0.338383000  |
| 6                                                        | 1.863321000  | 0.133181000  | -1.276953000 | 6                                                     | 0.908731000  | 2.592695000  | 0.774888000  |
| 6                                                        | 0.755635000  | 2.316661000  | -1.585309000 | 6                                                     | 0.932860000  | 1.803828000  | -1.987603000 |
| 6                                                        | 0.036982000  | 1.757508000  | -2.704181000 | 17                                                    | -1.318310000 | -0.019700000 | 0.006139000  |
| 6                                                        | 0.243143000  | 0.430391000  | -3.090503000 | 28                                                    | 3.643051000  | 0.630794000  | -0.145750000 |
| 6                                                        | 1.661826000  | 1.504023000  | -0.872150000 | 17                                                    | 4.744702000  | 2.466245000  | -0.522619000 |
| 17                                                       | -1.381729000 | 0.002729000  | -0.004649000 | 7                                                     | 5.184337000  | -0.628805000 | 0.140997000  |
| 15                                                       | 5.190755000  | -0.546526000 | 0.051692000  | 6                                                     | 6.525372000  | 0.005053000  | -0.070057000 |
| 6                                                        | 5.542582000  | -1.628401000 | -1.394693000 | 1                                                     | 6.516831000  | 0.436790000  | -1.071903000 |
| 1                                                        | 5.832848000  | -0.967243000 | -2.218444000 | 1                                                     | 6.578717000  | 0.862130000  | 0.601658000  |
| 1                                                        | 6.432241000  | -2.221419000 | -1.138918000 | 6                                                     | 7.715161000  | -0.914337000 | 0.119866000  |
| 6                                                        | 4.391457000  | -2.522831000 | -1.817797000 | 1                                                     | 7.778328000  | -1.327646000 | 1.130788000  |
| 1                                                        | 3.538215000  | -1.932457000 | -2.165101000 | 1                                                     | 8.628078000  | -0.338138000 | -0.047078000 |
| 1                                                        | 4.041590000  | -3.162463000 | -1.001662000 | 1                                                     | 7.729077000  | -1.748178000 | -0.588120000 |
| 1                                                        | 4.693536000  | -3.175641000 | -2.640456000 | 6                                                     | 4.996439000  | -1.780515000 | -0.795289000 |
| 6                                                        | 6.847161000  | 0.167373000  | 0.412645000  | 1                                                     | 5.721242000  | -2.563700000 | -0.531366000 |
| 1                                                        | 6.706794000  | 0.925769000  | 1.190407000  | 1                                                     | 4.006341000  | -2.195682000 | -0.586448000 |
| 1                                                        | 7.463042000  | -0.626240000 | 0.856054000  | 6                                                     | 5.125901000  | -1.404869000 | -2.253925000 |
| 6                                                        | 7.542365000  | 0.767152000  | -0.800421000 | 1                                                     | 4.519557000  | -0.524707000 | -2.493989000 |
| 1                                                        | 6.902358000  | 1.477737000  | -1.330400000 | 1                                                     | 4.771701000  | -2.228569000 | -2.877779000 |
| 1                                                        | 7.846890000  | -0.004322000 | -1.512801000 | 1                                                     | 6.159147000  | -1.192557000 | -2.540558000 |
| 1                                                        | 8.443029000  | 1.306936000  | -0.499026000 | 6                                                     | 5.057659000  | -1.142268000 | 1.541070000  |
| 6                                                        | 4.949039000  | -1.727676000 | 1.441588000  | 1                                                     | 4.067356000  | -1.601490000 | 1.614581000  |
| 1                                                        | 3.986206000  | -2.226927000 | 1.281170000  | 1                                                     | 5.786298000  | -1.953360000 | 1.681339000  |
| 1                                                        | 5.726487000  | -2.499956000 | 1.363827000  | 6                                                     | 5.234486000  | -0.076614000 | 2.599130000  |
| 6                                                        | 4.980597000  | -1.054820000 | 2.805014000  | 1                                                     | 6.272873000  | 0.250999000  | 2.693625000  |
| 1                                                        | 4.231203000  | -0.259754000 | 2.872371000  | 1                                                     | 4.922107000  | -0.469122000 | 3.569443000  |
| 1                                                        | 5.958187000  | -0.612019000 | 3.017923000  | 1                                                     | 4.620919000  | 0.805141000  | 2.384573000  |
| 1                                                        | 4.767426000  | -1.776460000 | 3.597387000  |                                                       |              |              |              |
| (Cl <sup>-</sup> @C <sub>60</sub> )NiPMe <sub>3</sub> Cl |              |              |              | (Cl <sup>-</sup> @C <sub>60</sub> )CuNMe <sub>3</sub> |              |              |              |
| 6                                                        | -3.244653000 | -1.183020000 | -2.603013000 | 29                                                    | -4.143149000 | -0.393764000 | -0.005294000 |
| 6                                                        | -2.165021000 | -2.143816000 | -2.615748000 | 7                                                     | -6.028557000 | 0.119826000  | 0.001825000  |
| 6                                                        | -3.014223000 | 0.126462000  | -3.017478000 | 6                                                     | -6.226898000 | 1.043325000  | -1.134230000 |
| 6                                                        | -0.899786000 | -1.766286000 | -3.052042000 | 1                                                     | -5.522836000 | 1.874337000  | -1.050991000 |
| 6                                                        | 0.269209000  | -2.219179000 | -2.328279000 | 1                                                     | -6.036638000 | 0.517126000  | -2.071690000 |
| 6                                                        | -2.309933000 | -2.995764000 | -1.455058000 | 6                                                     | -6.959497000 | -1.016401000 | -0.117351000 |
| 6                                                        | -1.183911000 | -3.443354000 | -0.765992000 | 1                                                     | -6.812133000 | -1.700876000 | 0.719969000  |
| 6                                                        | 0.134372000  | -3.049330000 | -1.206286000 | 1                                                     | -8.002920000 | -0.667918000 | -0.115170000 |

|    |              |              |              |   |              |              |              |
|----|--------------|--------------|--------------|---|--------------|--------------|--------------|
| 6  | -4.365659000 | 0.981873000  | -1.152537000 | 6 | -6.289405000 | 0.843929000  | 1.262362000  |
| 6  | -4.605494000 | -0.375901000 | -0.722885000 | 1 | -7.316204000 | 1.237296000  | 1.283053000  |
| 6  | -3.585793000 | 1.228741000  | -2.280186000 | 1 | -5.584198000 | 1.672958000  | 1.354882000  |
| 6  | -4.054810000 | -1.439506000 | -1.435492000 | 1 | -6.148668000 | 0.168933000  | 2.108732000  |
| 6  | -3.475201000 | -2.556895000 | -0.729104000 | 1 | -7.253614000 | 1.437151000  | -1.144332000 |
| 6  | -4.603733000 | -0.394534000 | 0.721055000  | 1 | -6.766355000 | -1.552502000 | -1.048300000 |
| 6  | -4.051089000 | -1.476050000 | 1.404547000  | 6 | 3.517195000  | -0.607275000 | 2.294787000  |
| 6  | -3.473571000 | -2.574989000 | 0.668255000  | 6 | 2.705860000  | 0.342702000  | 3.019064000  |
| 6  | -2.472794000 | 3.095496000  | -1.126856000 | 6 | 4.228054000  | -0.199453000 | 1.167737000  |
| 6  | -3.286164000 | 2.841524000  | 0.039201000  | 6 | 2.634982000  | 1.667620000  | 2.591715000  |
| 6  | -2.618675000 | 2.301081000  | -2.265316000 | 6 | 1.367441000  | 2.359658000  | 2.594416000  |
| 6  | -4.213647000 | 1.802633000  | 0.026837000  | 6 | 1.510785000  | -0.336185000 | 3.462614000  |
| 6  | -4.362810000 | 0.951706000  | 1.184994000  | 6 | 0.289810000  | 0.334112000  | 3.472700000  |
| 6  | -2.470206000 | 3.065504000  | 1.209511000  | 6 | 0.216834000  | 1.706865000  | 3.030791000  |
| 6  | -2.613266000 | 2.241838000  | 2.327297000  | 6 | 3.605630000  | -2.267291000 | -0.006440000 |
| 6  | -3.580347000 | 1.169523000  | 2.316854000  | 6 | 2.867283000  | -2.689530000 | 1.160868000  |
| 6  | -0.181915000 | 2.245315000  | -2.571426000 | 6 | 4.273117000  | -1.044028000 | -0.003174000 |
| 6  | -0.030105000 | 3.061207000  | -1.391462000 | 6 | 2.823803000  | -1.874376000 | 2.290943000  |
| 6  | -1.453791000 | 1.868836000  | -2.999056000 | 6 | 1.584286000  | -1.708637000 | 3.012640000  |
| 6  | -1.154920000 | 3.470386000  | -0.680681000 | 6 | 1.672533000  | -3.365942000 | 0.714219000  |
| 6  | -1.153307000 | 3.451425000  | 0.769823000  | 6 | 0.479411000  | -3.212930000 | 1.415883000  |
| 6  | 1.138441000  | 2.594962000  | -0.675359000 | 6 | 0.434448000  | -2.369010000 | 2.586388000  |
| 6  | 1.139565000  | 2.576391000  | 0.736309000  | 6 | 3.517000000  | -0.594492000 | -2.298564000 |
| 6  | -0.026929000 | 3.024388000  | 1.467406000  | 6 | 2.823288000  | -1.861516000 | -2.301205000 |
| 6  | -0.660476000 | -0.408718000 | -3.482897000 | 6 | 4.228354000  | -0.192931000 | -1.169558000 |
| 6  | 0.654940000  | -0.021907000 | -3.026146000 | 6 | 2.866972000  | -2.683086000 | -1.175757000 |
| 6  | -1.696617000 | 0.521407000  | -3.462104000 | 6 | 1.672343000  | -3.361949000 | -0.732601000 |
| 6  | 0.893874000  | 1.281153000  | -2.585207000 | 6 | 1.583971000  | -1.691870000 | -3.022010000 |
| 6  | 1.713368000  | 1.518095000  | -1.421080000 | 6 | 0.434206000  | -2.354448000 | -2.599077000 |
| 6  | 1.226504000  | -1.150412000 | -2.329161000 | 6 | 0.479136000  | -3.204788000 | -1.433409000 |
| 6  | 1.998394000  | -0.927706000 | -1.190092000 | 6 | 3.373163000  | 2.098555000  | -1.413301000 |
| 6  | 2.271233000  | 0.415827000  | -0.733239000 | 6 | 2.634647000  | 1.681963000  | -2.582498000 |
| 6  | 0.900000000  | 1.214088000  | 2.612835000  | 6 | 4.155595000  | 1.177614000  | -0.719115000 |
| 6  | 1.716787000  | 1.480963000  | 1.453047000  | 6 | 2.705421000  | 0.359471000  | -3.017406000 |
| 6  | 2.271299000  | 0.397185000  | 0.735528000  | 6 | 1.510343000  | -0.316961000 | -3.464762000 |
| 6  | 0.662601000  | -0.099603000 | 3.021014000  | 6 | 1.367207000  | 2.374098000  | -2.581395000 |
| 6  | -1.688283000 | 0.432186000  | 3.476193000  | 6 | 0.216513000  | 1.723815000  | -3.021429000 |
| 6  | -1.446625000 | 1.790950000  | 3.047289000  | 6 | 0.289384000  | 0.353419000  | -3.470387000 |
| 6  | -0.175773000 | 2.178475000  | 2.626448000  | 6 | 3.373522000  | 2.090775000  | 1.424871000  |
| 6  | -0.651984000 | -0.498077000 | 3.470077000  | 6 | 2.561921000  | 3.044045000  | 0.705372000  |
| 6  | -2.158583000 | -2.210006000 | 2.561526000  | 6 | 4.155623000  | 1.173573000  | 0.725243000  |
| 6  | -3.238266000 | -1.249770000 | 2.576566000  | 6 | 2.561706000  | 3.047980000  | -0.688548000 |
| 6  | -3.006712000 | 0.048642000  | 3.024001000  | 6 | 1.321776000  | 3.219262000  | -1.409295000 |
| 6  | -0.892329000 | -1.844012000 | 3.004658000  | 6 | 1.321981000  | 3.211005000  | 1.426960000  |
| 6  | 0.137149000  | -3.078738000 | 1.123474000  | 6 | 0.127402000  | 3.384575000  | 0.731400000  |
| 6  | -1.182144000 | -3.461874000 | 0.676629000  | 6 | 0.127268000  | 3.388411000  | -0.712739000 |
| 6  | -2.306430000 | -3.031977000 | 1.379588000  | 6 | -1.711272000 | 0.625122000  | -2.303064000 |
| 6  | 0.274827000  | -2.277748000 | 2.266534000  | 6 | -1.021663000 | 1.890201000  | -2.294450000 |
| 6  | 2.000976000  | -0.957455000 | 1.157837000  | 6 | -1.065411000 | 2.706152000  | -1.161263000 |
| 6  | 1.871422000  | -1.773791000 | -0.026802000 | 6 | -2.432591000 | 0.218083000  | -1.175672000 |
| 6  | 0.951213000  | -2.841087000 | -0.039418000 | 6 | -1.568404000 | -2.089646000 | -1.434491000 |
| 6  | 1.232139000  | -1.209656000 | 2.293021000  | 6 | -0.832835000 | -1.658012000 | -2.594563000 |
| 17 | -1.123064000 | 0.012946000  | 0.000309000  | 6 | -0.903582000 | -0.328354000 | -3.020144000 |
| 28 | 3.860504000  | -0.619831000 | -0.013951000 | 6 | -2.358544000 | -1.167882000 | -0.732601000 |
| 17 | 5.341585000  | -2.208978000 | 0.005456000  | 6 | -1.568089000 | -2.097704000 | 1.423264000  |
| 15 | 5.389403000  | 0.863914000  | -0.001430000 | 6 | -0.759943000 | -3.037474000 | 0.691210000  |
| 6  | 6.437039000  | 0.759833000  | 1.477626000  | 6 | -0.760261000 | -3.033698000 | -0.707774000 |
| 1  | 5.835048000  | 0.923422000  | 2.374081000  | 6 | -2.358593000 | -1.172383000 | 0.727138000  |
| 1  | 6.868550000  | -0.241788000 | 1.529019000  | 6 | -1.711230000 | 0.612216000  | 2.307270000  |
| 6  | 4.824140000  | 2.590335000  | -0.051038000 | 6 | -0.903085000 | -0.345198000 | 3.018840000  |
| 1  | 5.675474000  | 3.275666000  | -0.003774000 | 6 | -0.832569000 | -1.672604000 | 2.585891000  |
| 1  | 4.268021000  | 2.777413000  | -0.972659000 | 6 | -2.432811000 | 0.211116000  | 1.178097000  |
| 6  | 6.537616000  | 0.712227000  | -1.399042000 | 6 | -1.800250000 | 2.288517000  | 0.006509000  |
| 1  | 5.999135000  | 0.837458000  | -2.340749000 | 6 | -1.065125000 | 2.699698000  | 1.176254000  |

|                                                       |              |              |              |                                         |              |              |              |
|-------------------------------------------------------|--------------|--------------|--------------|-----------------------------------------|--------------|--------------|--------------|
| 1                                                     | 7.327561000  | 1.466899000  | -1.336794000 | 6                                       | -1.021114000 | 1.877142000  | 2.304713000  |
| 1                                                     | 4.158017000  | 2.793395000  | 0.791461000  | 6                                       | -2.478873000 | 1.066127000  | 0.003427000  |
| 1                                                     | 7.235591000  | 1.507200000  | 1.442760000  | 17                                      | 0.849753000  | 0.000196000  | 0.000750000  |
| 1                                                     | 6.975795000  | -0.287539000 | -1.382246000 |                                         |              |              |              |
| (Cl <sup>-</sup> @C <sub>60</sub> )CuPMe <sub>3</sub> |              |              |              | (Cl <sup>-</sup> @C <sub>60</sub> )CuCO |              |              |              |
| 29                                                    | 3.702285000  | 0.056375000  | -0.173734000 | 29                                      | -4.464002000 | -0.003633000 | -0.002729000 |
| 15                                                    | 5.832660000  | -0.008448000 | 0.039092000  | 8                                       | -7.387735000 | 0.007778000  | 0.005406000  |
| 6                                                     | -3.922013000 | 1.874159000  | 1.568126000  | 6                                       | -6.238898000 | 0.001795000  | 0.000848000  |
| 6                                                     | -3.121050000 | 1.461411000  | 2.696712000  | 6                                       | 3.183976000  | -1.442134000 | -1.933767000 |
| 6                                                     | -4.666056000 | 0.931838000  | 0.860723000  | 6                                       | 2.424373000  | -2.605164000 | -1.539271000 |
| 6                                                     | -3.093927000 | 0.121219000  | 3.079404000  | 6                                       | 3.914602000  | -0.732465000 | -0.982953000 |
| 6                                                     | -1.844836000 | -0.493638000 | 3.463516000  | 6                                       | 2.423990000  | -3.019125000 | -0.208099000 |
| 6                                                     | -1.899912000 | 2.232335000  | 2.684953000  | 6                                       | 1.194648000  | -3.458010000 | 0.409072000  |
| 6                                                     | -0.697295000 | 1.640841000  | 3.063904000  | 6                                       | 1.195594000  | -2.616473000 | -2.297369000 |
| 6                                                     | -0.669087000 | 0.252885000  | 3.460783000  | 6                                       | 0.013107000  | -3.050311000 | -1.704309000 |
| 6                                                     | -4.014149000 | 1.975006000  | -1.267386000 | 6                                       | 0.012644000  | -3.478967000 | -0.326255000 |
| 6                                                     | -3.241223000 | 2.950431000  | -0.534691000 | 6                                       | 3.182473000  | 1.396202000  | -1.969988000 |
| 6                                                     | -4.713017000 | 0.983192000  | -0.581947000 | 6                                       | 2.423126000  | 0.660841000  | -2.953858000 |
| 6                                                     | -3.195947000 | 2.900869000  | 0.857835000  | 6                                       | 3.913767000  | 0.711754000  | -1.001287000 |
| 6                                                     | -1.946416000 | 3.123558000  | 1.546673000  | 6                                       | 2.423973000  | -0.733119000 | -2.936158000 |
| 6                                                     | -2.038356000 | 3.223819000  | -1.285431000 | 6                                       | 1.195247000  | -1.456890000 | -3.162478000 |
| 6                                                     | -0.835548000 | 3.447260000  | -0.619980000 | 6                                       | 1.193499000  | 1.377063000  | -3.198553000 |
| 6                                                     | -0.788712000 | 3.396175000  | 0.822016000  | 6                                       | 0.011629000  | 0.677830000  | -3.427474000 |
| 6                                                     | -4.015856000 | -0.692009000 | -2.240333000 | 6                                       | 0.012502000  | -0.765245000 | -3.409128000 |
| 6                                                     | -3.289779000 | 0.335291000  | -2.949711000 | 6                                       | 3.180437000  | 2.307582000  | 0.718326000  |
| 6                                                     | -4.713919000 | -0.373824000 | -1.076979000 | 6                                       | 2.420205000  | 3.015346000  | -0.284777000 |
| 6                                                     | -3.288912000 | 1.644959000  | -2.471952000 | 6                                       | 3.912730000  | 1.175472000  | 0.366520000  |
| 6                                                     | -2.067915000 | 2.415769000  | -2.484778000 | 6                                       | 2.421238000  | 2.567833000  | -1.605090000 |
| 6                                                     | -2.069643000 | -0.247645000 | -3.456389000 | 6                                       | 1.192379000  | 2.558275000  | -2.363144000 |
| 6                                                     | -0.894685000 | 0.499519000  | -3.476725000 | 6                                       | 1.190343000  | 3.468243000  | 0.321151000  |
| 6                                                     | -0.893799000 | 1.855772000  | -2.982176000 | 6                                       | 0.008300000  | 3.468745000  | -0.414396000 |
| 6                                                     | -3.925180000 | -2.440985000 | -0.006015000 | 6                                       | 0.009360000  | 3.005311000  | -1.781087000 |
| 6                                                     | -3.199714000 | -2.769785000 | -1.210825000 | 6                                       | 3.181037000  | 0.032401000  | 2.415892000  |
| 6                                                     | -4.667811000 | -1.263645000 | 0.059856000  | 6                                       | 2.419862000  | 1.204501000  | 2.779254000  |
| 6                                                     | -3.244313000 | -1.910914000 | -2.307987000 | 6                                       | 3.912916000  | 0.017833000  | 1.230223000  |
| 6                                                     | -2.041463000 | -1.638213000 | -3.059079000 | 6                                       | 2.419510000  | 2.321783000  | 1.945576000  |
| 6                                                     | -1.950738000 | -3.385159000 | -0.827680000 | 6                                       | 1.189876000  | 3.038583000  | 1.702639000  |
| 6                                                     | -0.793011000 | -3.128744000 | -1.558236000 | 6                                       | 1.190495000  | 0.767086000  | 3.397313000  |
| 6                                                     | -0.839284000 | -2.239399000 | -2.694675000 | 6                                       | 0.007721000  | 1.465626000  | 3.171036000  |
| 6                                                     | -3.867019000 | -0.854837000 | 2.347710000  | 6                                       | 0.007349000  | 2.622345000  | 2.308104000  |
| 6                                                     | -3.095490000 | -2.073787000 | 2.278781000  | 6                                       | 3.183236000  | -2.285033000 | 0.776666000  |
| 6                                                     | -4.638214000 | -0.456597000 | 1.257387000  | 6                                       | 2.422340000  | -2.269098000 | 2.003807000  |
| 6                                                     | -3.124148000 | -2.852673000 | 1.123007000  | 6                                       | 3.914172000  | -1.161325000 | 0.396214000  |
| 6                                                     | -1.903816000 | -3.436172000 | 0.616902000  | 6                                       | 2.421273000  | -1.131031000 | 2.808845000  |
| 6                                                     | -1.845883000 | -1.852279000 | 2.968130000  | 6                                       | 1.191359000  | -0.679556000 | 3.415641000  |
| 6                                                     | -0.671033000 | -2.423015000 | 2.484447000  | 6                                       | 1.193611000  | -2.993359000 | 1.779148000  |
| 6                                                     | -0.700638000 | -3.229445000 | 1.287188000  | 6                                       | 0.010596000  | -2.563509000 | 2.374042000  |
| 6                                                     | 1.178226000  | -1.882035000 | -1.579987000 | 6                                       | 0.009496000  | -1.385179000 | 3.207302000  |
| 6                                                     | 0.455172000  | -2.901590000 | -0.864554000 | 6                                       | -1.975159000 | 1.450430000  | 1.944746000  |
| 6                                                     | 0.500380000  | -2.951040000 | 0.531685000  | 6                                       | -1.219011000 | 0.735654000  | 2.938175000  |
| 6                                                     | 1.930559000  | -0.937020000 | -0.870911000 | 6                                       | -1.218179000 | -0.662960000 | 2.955981000  |
| 6                                                     | 1.122818000  | 0.860402000  | -2.363567000 | 6                                       | -2.713742000 | 0.737583000  | 0.989704000  |
| 6                                                     | 0.353252000  | -0.118446000 | -3.086722000 | 6                                       | -1.974296000 | 2.297856000  | -0.780816000 |
| 6                                                     | 0.380455000  | -1.462517000 | -2.702966000 | 6                                       | -1.219078000 | 3.021817000  | 0.206648000  |
| 6                                                     | 1.902756000  | 0.461298000  | -1.270362000 | 6                                       | -1.219596000 | 2.606712000  | 1.542361000  |
| 6                                                     | 1.181022000  | 2.453906000  | 0.001928000  | 6                                       | -2.713229000 | 1.169177000  | -0.398636000 |
| 6                                                     | 0.383272000  | 2.856910000  | -1.127283000 | 6                                       | -1.971942000 | -0.032375000 | -2.429031000 |
| 6                                                     | 0.354619000  | 2.075948000  | -2.286400000 | 6                                       | -1.216351000 | 1.130497000  | -2.811747000 |
| 6                                                     | 1.931497000  | 1.273380000  | -0.064227000 | 6                                       | -1.217468000 | 2.272383000  | -2.003989000 |
| 6                                                     | 1.272005000  | 0.696059000  | 2.245493000  | 6                                       | -2.711954000 | -0.017731000 | -1.238186000 |
| 6                                                     | 0.503658000  | 1.912669000  | 2.305803000  | 6                                       | -1.971370000 | -2.320131000 | -0.722145000 |
| 6                                                     | 0.458951000  | 2.774294000  | 1.206070000  | 6                                       | -1.214620000 | -2.324739000 | -1.945667000 |

|    |              |              |              |   |              |              |              |
|----|--------------|--------------|--------------|---|--------------|--------------|--------------|
| 6  | 1.978051000  | 0.377494000  | 1.079629000  | 6 | -1.214876000 | -1.203611000 | -2.782027000 |
| 6  | 1.270277000  | -1.982498000 | 1.268767000  | 6 | -2.711755000 | -1.183054000 | -0.368779000 |
| 6  | 0.548476000  | -1.646204000 | 2.469209000  | 6 | -1.973473000 | -1.403742000 | 1.981037000  |
| 6  | 0.549529000  | -0.333104000 | 2.948146000  | 6 | -1.216309000 | -2.568793000 | 1.608087000  |
| 6  | 1.976196000  | -0.988325000 | 0.581301000  | 6 | -1.215271000 | -3.017836000 | 0.283351000  |
| 17 | -1.323171000 | 0.001985000  | -0.004592000 | 6 | -2.712828000 | -0.716228000 | 1.008131000  |
| 6  | 6.775181000  | -0.620068000 | -1.413073000 |   | 0.542377000  | -0.000064000 | 0.000215000  |
| 1  | 6.738670000  | 0.169684000  | -2.172043000 |   |              |              |              |
| 1  | 7.829179000  | -0.735845000 | -1.129533000 |   |              |              |              |
| 6  | 6.202341000  | -1.914722000 | -1.967974000 |   |              |              |              |
| 1  | 5.148699000  | -1.792134000 | -2.240837000 |   |              |              |              |
| 1  | 6.256874000  | -2.729557000 | -1.239563000 |   |              |              |              |
| 1  | 6.744472000  | -2.237862000 | -2.859533000 |   |              |              |              |
| 6  | 6.618448000  | 1.602940000  | 0.438067000  |   |              |              |              |
| 1  | 6.319859000  | 1.855950000  | 1.461848000  |   |              |              |              |
| 1  | 7.708212000  | 1.473071000  | 0.450487000  |   |              |              |              |
| 6  | 6.198049000  | 2.703671000  | -0.522967000 |   |              |              |              |
| 1  | 5.109046000  | 2.821187000  | -0.530013000 |   |              |              |              |
| 1  | 6.510028000  | 2.489380000  | -1.549803000 |   |              |              |              |
| 1  | 6.637019000  | 3.663836000  | -0.242624000 |   |              |              |              |
| 6  | 6.354582000  | -1.111605000 | 1.413377000  |   |              |              |              |
| 1  | 6.213253000  | -2.141390000 | 1.065671000  |   |              |              |              |
| 1  | 7.430541000  | -0.981689000 | 1.586600000  |   |              |              |              |
| 6  | 5.548363000  | -0.867753000 | 2.680086000  |   |              |              |              |
| 1  | 4.476703000  | -0.994945000 | 2.489207000  |   |              |              |              |
| 1  | 5.690722000  | 0.146907000  | 3.065019000  |   |              |              |              |
| 1  | 5.834520000  | -1.562022000 | 3.473210000  |   |              |              |              |

**12. Cartesian coordinates of optimized geometry of (Cl<sup>-</sup>C<sub>60</sub>)ML<sub>n</sub> complexes at Mo6L/6-31G(d,p) level.  
Atomic number followed by X, Y, Z coordinates in Å.**

| (Cl <sup>-</sup> C <sub>60</sub> )ScNMe <sub>3</sub> (CO) <sub>2</sub> |              |              |              | (Cl <sup>-</sup> C <sub>60</sub> )ScPMe <sub>3</sub> (CO) <sub>2</sub> |              |              |              |
|------------------------------------------------------------------------|--------------|--------------|--------------|------------------------------------------------------------------------|--------------|--------------|--------------|
| 21                                                                     | 4.150186000  | 0.033600000  | 0.240518000  | 21                                                                     | -4.030703000 | 0.783751000  | -0.529902000 |
| 7                                                                      | 5.166361000  | -1.775332000 | -0.788468000 | 15                                                                     | -5.333428000 | -1.455184000 | 0.429932000  |
| 8                                                                      | 5.620808000  | -0.290533000 | 3.242627000  | 8                                                                      | -6.634314000 | 0.398642000  | -2.595882000 |
| 8                                                                      | 6.486871000  | 2.360521000  | -0.498794000 | 8                                                                      | -6.308665000 | 2.196134000  | 1.478209000  |
| 6                                                                      | 5.094694000  | -0.173745000 | 2.212691000  | 6                                                                      | -5.692369000 | 0.601339000  | -1.938691000 |
| 6                                                                      | 5.661186000  | 1.580938000  | -0.264416000 | 6                                                                      | -5.478836000 | 1.779043000  | 0.776089000  |
| 6                                                                      | 6.612919000  | -1.495085000 | -0.724854000 | 6                                                                      | -7.141761000 | -1.306300000 | 0.649194000  |
| 1                                                                      | 6.850375000  | -0.623535000 | -1.340355000 | 1                                                                      | -7.365799000 | -0.516575000 | 1.369900000  |
| 6                                                                      | 6.910328000  | -1.290304000 | 0.308891000  | 1                                                                      | -7.610270000 | -1.035318000 | -0.299804000 |
| 6                                                                      | 4.868893000  | -2.999689000 | -0.020154000 | 6                                                                      | -5.158017000 | -2.918416000 | -0.651329000 |
| 1                                                                      | 3.803047000  | -3.228281000 | -0.094440000 | 1                                                                      | -4.097545000 | -3.153559000 | -0.779937000 |
| 1                                                                      | 5.446667000  | -3.851768000 | -0.405397000 | 1                                                                      | -5.667307000 | -3.789817000 | -0.229079000 |
| 6                                                                      | 4.749840000  | -1.944603000 | -2.192387000 | 6                                                                      | -4.754822000 | -2.047085000 | 2.059265000  |
| 1                                                                      | 5.328953000  | -2.741017000 | -2.680544000 | 1                                                                      | -5.325265000 | -2.920175000 | 2.389844000  |
| 1                                                                      | 4.907390000  | -1.010325000 | -2.739189000 | 1                                                                      | -4.858331000 | -1.253077000 | 2.803109000  |
| 1                                                                      | 3.688840000  | -2.203371000 | -2.229303000 | 1                                                                      | -3.696802000 | -2.318568000 | 1.998678000  |
| 1                                                                      | 7.197585000  | -2.350003000 | -1.092380000 | 1                                                                      | -7.576498000 | -2.244978000 | 1.005076000  |
| 1                                                                      | 5.126148000  | -2.848072000 | 1.032500000  | 1                                                                      | -5.582256000 | -2.703307000 | -1.635407000 |
| 6                                                                      | -3.805912000 | -1.237567000 | -2.230342000 | 6                                                                      | 3.533844000  | -2.306495000 | 1.828805000  |
| 6                                                                      | -2.990217000 | -0.420224000 | -3.095270000 | 6                                                                      | 2.793628000  | -1.654997000 | 2.885608000  |
| 6                                                                      | -4.591103000 | -0.638339000 | -1.243249000 | 6                                                                      | 4.452474000  | -1.580702000 | 1.067907000  |
| 6                                                                      | -2.989259000 | 0.968985000  | -2.953101000 | 6                                                                      | 2.997515000  | -0.295679000 | 3.142911000  |
| 6                                                                      | -1.748436000 | 1.701338000  | -3.037933000 | 6                                                                      | 1.871295000  | 0.563035000  | 3.413068000  |
| 6                                                                      | -1.748448000 | -1.124880000 | -3.331784000 | 6                                                                      | 1.456852000  | -2.198177000 | 2.895350000  |
| 6                                                                      | -0.551525000 | -0.415104000 | -3.414490000 | 6                                                                      | 0.367032000  | -1.364182000 | 3.163182000  |
| 6                                                                      | -0.548828000 | 1.021148000  | -3.262101000 | 6                                                                      | 0.580482000  | 0.040473000  | 3.427139000  |
| 6                                                                      | -3.955861000 | -2.390037000 | 0.362728000  | 6                                                                      | 3.672245000  | -2.691747000 | -0.983518000 |
| 6                                                                      | -3.144373000 | -3.014746000 | -0.658159000 | 6                                                                      | 2.717060000  | -3.437313000 | -0.197028000 |



|                        |              |              |              |                          |              |              |              |
|------------------------|--------------|--------------|--------------|--------------------------|--------------|--------------|--------------|
| 6                      | -4.669429000 | -1.225908000 | 0.076095000  | 6                        | 4.522208000  | -1.776108000 | -0.362848000 |
| 6                      | -3.068079000 | -2.447792000 | -1.934034000 | 6                        | 2.652159000  | -3.254106000 | 1.186971000  |
| 6                      | -1.801950000 | -2.384259000 | -2.618885000 | 6                        | 1.367073000  | -3.185199000 | 1.842024000  |
| 6                      | -1.955665000 | -3.533910000 | -0.027189000 | 6                        | 1.502625000  | -3.567285000 | -0.968146000 |
| 6                      | -0.728900000 | -3.477217000 | -0.687764000 | 6                        | 0.261913000  | -3.509290000 | -0.333692000 |
| 6                      | -0.649437000 | -2.887588000 | -2.008389000 | 6                        | 0.192774000  | -3.316821000 | 1.097707000  |
| 6                      | -4.052083000 | -0.280985000 | 2.264662000  | 6                        | 4.180998000  | -0.170808000 | -2.197556000 |
| 6                      | -3.315029000 | -1.490528000 | 2.563352000  | 6                        | 3.301553000  | -1.122084000 | -2.843431000 |
| 6                      | -4.716690000 | -0.151842000 | 1.042995000  | 6                        | 4.785487000  | -0.494461000 | -0.980921000 |
| 6                      | -3.270056000 | -2.528063000 | 1.628072000  | 6                        | 3.047976000  | -2.356561000 | -2.244598000 |
| 6                      | -2.033044000 | -3.232116000 | 1.390195000  | 6                        | 1.707167000  | -2.896567000 | -2.235239000 |
| 6                      | -2.124943000 | -1.125752000 | 3.290573000  | 6                        | 2.220546000  | -0.382267000 | -3.453954000 |
| 6                      | -0.927463000 | -1.806998000 | 3.061996000  | 6                        | 0.926106000  | -0.903574000 | -3.445493000 |
| 6                      | -0.881473000 | -2.882885000 | 2.094140000  | 6                        | 0.663347000  | -2.183219000 | -2.823722000 |
| 6                      | -3.955117000 | 2.180254000  | 0.843907000  | 6                        | 4.335981000  | 1.773810000  | -0.135890000 |
| 6                      | -3.266183000 | 2.046607000  | 2.110232000  | 6                        | 3.713734000  | 2.111531000  | -1.398692000 |
| 6                      | -4.667726000 | 1.099027000  | 0.321986000  | 6                        | 4.863184000  | 0.495044000  | 0.067565000  |
| 6                      | -3.312902000 | 0.835058000  | 2.803236000  | 6                        | 3.647527000  | 1.152109000  | -2.418661000 |
| 6                      | -2.118568000 | 0.315110000  | 3.433352000  | 6                        | 2.435268000  | 1.022189000  | -3.187446000 |
| 6                      | -2.024366000 | 2.775932000  | 2.018796000  | 6                        | 2.597582000  | 2.979251000  | -1.133711000 |
| 6                      | -0.869988000 | 2.271729000  | 2.622970000  | 6                        | 1.418364000  | 2.833448000  | -1.856509000 |
| 6                      | -0.920550000 | 1.021459000  | 3.343425000  | 6                        | 1.345052000  | 1.852518000  | -2.917363000 |
| 6                      | -3.803687000 | 1.590251000  | -1.929816000 | 6                        | 3.950343000  | 0.456723000  | 2.354010000  |
| 6                      | -3.064117000 | 2.704837000  | -1.386921000 | 6                        | 3.411848000  | 1.780302000  | 2.144591000  |
| 6                      | -4.590199000 | 0.798324000  | -1.091067000 | 6                        | 4.661615000  | -0.174926000 | 1.333063000  |
| 6                      | -3.139128000 | 2.995185000  | -0.024668000 | 6                        | 3.595520000  | 2.423426000  | 0.915365000  |
| 6                      | -1.942328000 | 3.356696000  | 0.704160000  | 6                        | 2.513829000  | 3.164506000  | 0.313214000  |
| 6                      | -1.790649000 | 2.766880000  | -2.071637000 | 6                        | 2.132634000  | 1.849817000  | 2.793036000  |
| 6                      | -0.630059000 | 3.102728000  | -1.366218000 | 6                        | 1.092635000  | 2.558089000  | 2.186511000  |
| 6                      | -0.708126000 | 3.403411000  | 0.048507000  | 6                        | 1.289887000  | 3.254616000  | 0.950873000  |
| 6                      | 1.147534000  | 1.139681000  | 2.274559000  | 6                        | -0.720660000 | 1.992992000  | -1.834101000 |
| 6                      | 0.398512000  | 2.344372000  | 1.939985000  | 6                        | 0.125577000  | 2.925888000  | -1.223492000 |
| 6                      | 0.482804000  | 2.924057000  | 0.682431000  | 6                        | -0.018373000 | 3.329164000  | 0.192494000  |
| 6                      | 1.876441000  | 0.531087000  | 1.248161000  | 6                        | -1.731402000 | 1.281125000  | -1.110413000 |
| 6                      | 1.124463000  | -1.714906000 | 1.967543000  | 6                        | -1.155183000 | -0.797565000 | -2.385378000 |
| 6                      | 0.317871000  | -1.083865000 | 2.979683000  | 6                        | -0.195202000 | -0.037632000 | -3.162469000 |
| 6                      | 0.325880000  | 0.315881000  | 3.112541000  | 6                        | 0.012853000  | 1.312882000  | -2.898154000 |
| 6                      | 1.918239000  | -0.911455000 | 1.120618000  | 6                        | -1.838902000 | -0.148261000 | -1.351315000 |
| 6                      | 1.274393000  | -2.311442000 | -0.835214000 | 6                        | -1.564532000 | -2.131678000 | 0.111374000  |
| 6                      | 0.471063000  | -3.121910000 | 0.040005000  | 6                        | -0.828882000 | -2.773431000 | -0.939680000 |
| 6                      | 0.395282000  | -2.823144000 | 1.414644000  | 6                        | -0.624209000 | -2.111274000 | -2.164594000 |
| 6                      | 1.966210000  | -1.202688000 | -0.300890000 | 6                        | -2.066890000 | -0.820985000 | -0.091424000 |
| 6                      | 1.395892000  | 0.173877000  | -2.278628000 | 6                        | -1.381374000 | -0.163421000 | 2.190622000  |
| 6                      | 0.647541000  | -0.937683000 | -2.786462000 | 6                        | -0.846835000 | -1.491637000 | 2.389705000  |
| 6                      | 0.595007000  | -2.164764000 | -2.097710000 | 6                        | -0.933060000 | -2.451336000 | 1.370113000  |
| 6                      | 1.967379000  | 0.051017000  | -1.007904000 | 6                        | -1.967954000 | 0.166301000  | 0.959116000  |
| 6                      | 1.464244000  | 2.459662000  | -0.371487000 | 6                        | -0.886322000 | 2.374159000  | 0.972154000  |
| 6                      | 0.610271000  | 2.434585000  | -1.622619000 | 6                        | -0.248138000 | 2.009036000  | 2.189682000  |
| 6                      | 0.643503000  | 1.394391000  | -2.540598000 | 6                        | -0.507130000 | 0.780327000  | 2.820801000  |
| 6                      | 2.043562000  | 1.130432000  | -0.056625000 | 6                        | -1.724879000 | 1.453611000  | 0.346798000  |
| 17                     | 2.862966000  | 3.775835000  | -0.559629000 | 17                       | -0.749546000 | 5.104421000  | 0.352756000  |
| $(Cl^-C_{60})Sc(CO)_4$ |              |              |              | $(Cl^-C_{60})Ti(CO)_2Cl$ |              |              |              |
| 6                      | -0.991265000 | 2.504177000  | -1.175831000 | 6                        | 2.617345000  | 1.843597000  | 2.591310000  |
| 6                      | -1.889452000 | 2.183139000  | -0.000067000 | 6                        | 3.300493000  | 2.350602000  | 1.422015000  |
| 6                      | -0.874760000 | 1.691249000  | -2.288059000 | 6                        | 2.847300000  | 0.531641000  | 3.016361000  |
| 6                      | -2.339981000 | 0.760968000  | 0.000048000  | 6                        | 4.190282000  | 1.532574000  | 0.724080000  |
| 6                      | -2.129507000 | -0.085327000 | 1.159061000  | 6                        | 4.190390000  | 1.532850000  | -0.723077000 |
| 6                      | -0.991190000 | 2.504344000  | 1.175589000  | 6                        | 2.376398000  | 3.193216000  | 0.696577000  |
| 6                      | -0.874623000 | 1.691582000  | 2.287931000  | 6                        | 2.376501000  | 3.193488000  | -0.695206000 |
| 6                      | -1.481116000 | 0.363709000  | 2.322367000  | 6                        | 3.300695000  | 2.351138000  | -1.420830000 |
| 6                      | 1.472639000  | 2.372954000  | -2.588819000 | 6                        | 0.449116000  | 0.220383000  | 3.453247000  |
| 6                      | 1.357431000  | 3.206239000  | -1.421094000 | 6                        | 0.209131000  | 1.572405000  | 3.011068000  |

|                      |              |              |              |                       |              |              |              |
|----------------------|--------------|--------------|--------------|-----------------------|--------------|--------------|--------------|
| 6                    | 0.371977000  | 1.623537000  | -3.010824000 | 6                     | 1.742630000  | -0.290883000 | 3.457359000  |
| 6                    | 0.148735000  | 3.249172000  | -0.722645000 | 6                     | 1.274843000  | 2.370713000  | 2.589683000  |
| 6                    | 0.148780000  | 3.249275000  | 0.722225000  | 6                     | 1.121860000  | 3.197075000  | 1.421176000  |
| 6                    | 2.610557000  | 3.145061000  | -0.696170000 | 6                     | -1.038545000 | 1.583261000  | 2.288173000  |
| 6                    | 2.610599000  | 3.145162000  | 0.695617000  | 6                     | -1.191642000 | 2.387854000  | 1.175678000  |
| 6                    | 1.357517000  | 3.206447000  | 1.420608000  | 6                     | -0.087602000 | 3.184577000  | 0.722724000  |
| 6                    | 1.820820000  | -0.306769000 | -3.457762000 | 6                     | 0.930962000  | -2.452002000 | 2.588819000  |
| 6                    | 2.961119000  | 0.465369000  | -3.015735000 | 6                     | -0.420847000 | -1.934381000 | 2.591513000  |
| 6                    | 0.550729000  | 0.262475000  | -3.453603000 | 6                     | 1.990047000  | -1.651511000 | 3.014880000  |
| 6                    | 2.790598000  | 1.786112000  | -2.590846000 | 6                     | -0.663499000 | -0.605749000 | 3.012740000  |
| 6                    | 3.495814000  | 2.261906000  | -1.421467000 | 6                     | -1.582333000 | 0.228316000  | 2.322181000  |
| 6                    | 3.846514000  | -0.417720000 | -2.298233000 | 6                     | -1.085918000 | -2.446640000 | 1.438645000  |
| 6                    | 4.527823000  | 0.042239000  | -1.169748000 | 6                     | -1.953202000 | -1.602353000 | 0.717045000  |
| 6                    | 4.348751000  | 1.404859000  | -0.723718000 | 6                     | -2.222612000 | -0.250957000 | 1.164015000  |
| 6                    | -0.414764000 | -1.848579000 | -2.592070000 | 6                     | 3.393275000  | -2.467683000 | 1.168364000  |
| 6                    | 0.912171000  | -2.426355000 | -2.589494000 | 6                     | 2.297606000  | -3.296282000 | 0.722967000  |
| 6                    | -0.597821000 | -0.512356000 | -3.013667000 | 6                     | 3.239146000  | -1.659263000 | 2.296347000  |
| 6                    | 2.007272000  | -1.676651000 | -3.017425000 | 6                     | 1.090092000  | -3.291041000 | 1.421703000  |
| 6                    | 3.254722000  | -1.740555000 | -2.296751000 | 6                     | -0.160889000 | -3.279953000 | 0.696967000  |
| 6                    | 1.033452000  | -3.271580000 | -1.422347000 | 6                     | 2.297704000  | -3.296008000 | -0.724055000 |
| 6                    | 2.239104000  | -3.332233000 | -0.723529000 | 6                     | 1.090289000  | -3.290492000 | -1.422960000 |
| 6                    | 3.372215000  | -2.555197000 | -1.168954000 | 6                     | -0.160801000 | -3.279670000 | -0.698394000 |
| 6                    | -2.129587000 | -0.085495000 | -1.158861000 | 6                     | 4.430564000  | 0.179611000  | 1.169881000  |
| 6                    | -1.945141000 | -1.455490000 | -0.719093000 | 6                     | 4.583366000  | -0.656952000 | 0.000113000  |
| 6                    | -1.481250000 | 0.363368000  | -2.322263000 | 6                     | 3.770347000  | -0.310578000 | 2.298008000  |
| 6                    | -1.101515000 | -2.327311000 | -1.435469000 | 6                     | 4.073356000  | -1.955319000 | -0.000164000 |
| 6                    | -0.215838000 | -3.203440000 | -0.697393000 | 6                     | 3.393436000  | -2.467238000 | -1.168981000 |
| 6                    | -1.945078000 | -1.455374000 | 0.719489000  | 6                     | 4.430729000  | 0.180056000  | -1.169358000 |
| 6                    | -1.101426000 | -2.327098000 | 1.435941000  | 6                     | 3.770677000  | -0.309708000 | -2.297767000 |
| 6                    | -0.215795000 | -3.203339000 | 0.697939000  | 6                     | 3.239476000  | -1.658394000 | -2.296685000 |
| 6                    | 3.372286000  | -2.555027000 | 1.169189000  | 6                     | -0.420475000 | -1.933399000 | -2.592475000 |
| 6                    | 2.239148000  | -3.332127000 | 0.723948000  | 6                     | 0.931327000  | -2.451031000 | -2.589791000 |
| 6                    | 1.033537000  | -3.271370000 | 1.422828000  | 6                     | 1.990476000  | -1.650369000 | -3.015384000 |
| 6                    | 3.254861000  | -1.740219000 | 2.296874000  | 6                     | -0.663084000 | -0.604626000 | -3.013254000 |
| 6                    | 4.527894000  | 0.042410000  | 1.169533000  | 6                     | -2.222670000 | -0.250530000 | -1.164686000 |
| 6                    | 4.643567000  | -0.800300000 | -0.000050000 | 6                     | -1.953073000 | -1.602055000 | -0.718130000 |
| 6                    | 4.073928000  | -2.073829000 | 0.000061000  | 6                     | -1.085742000 | -2.446112000 | -1.439906000 |
| 6                    | 3.846653000  | -0.417384000 | 2.298126000  | 6                     | -1.581976000 | 0.229181000  | -2.322444000 |
| 6                    | 2.790753000  | 1.786489000  | 2.590479000  | 6                     | -1.191455000 | 2.388269000  | -1.175092000 |
| 6                    | 3.495900000  | 2.262113000  | 1.420990000  | 6                     | -2.087387000 | 2.038872000  | 0.000148000  |
| 6                    | 4.348795000  | 1.404964000  | 0.723315000  | 6                     | -2.485827000 | 0.591087000  | -0.000149000 |
| 6                    | 2.961302000  | 0.465809000  | 3.015553000  | 6                     | -1.038203000 | 1.584101000  | -2.287868000 |
| 6                    | 0.550938000  | 0.262979000  | 3.453594000  | 6                     | 1.275208000  | 2.371675000  | -2.588763000 |
| 6                    | 0.372159000  | 1.623976000  | 3.010628000  | 6                     | 1.122062000  | 3.197603000  | -1.419967000 |
| 6                    | 1.472795000  | 2.373331000  | 2.588446000  | 6                     | -0.087493000 | 3.184847000  | -0.721689000 |
| 6                    | 1.821030000  | -0.306264000 | 3.457760000  | 6                     | 0.209563000  | 1.573528000  | -3.010606000 |
| 6                    | 0.912328000  | -2.425975000 | 2.589860000  | 6                     | 1.743122000  | -0.289583000 | -3.457401000 |
| 6                    | -0.414605000 | -1.848198000 | 2.592433000  | 6                     | 2.847731000  | 0.532780000  | -3.015927000 |
| 6                    | -0.597637000 | -0.511914000 | 3.013838000  | 6                     | 2.617717000  | 1.844571000  | -2.590411000 |
| 6                    | 2.007456000  | -1.676209000 | 3.017614000  | 6                     | 0.449606000  | 0.221671000  | -3.453259000 |
| 21                   | -4.310011000 | -0.573984000 | 0.000080000  | 22                    | -4.188278000 | -0.894271000 | -0.000399000 |
| 6                    | -4.679901000 | -2.172764000 | 1.546053000  | 17                    | -5.727606000 | -2.512901000 | 0.000243000  |
| 8                    | -4.797758000 | -2.990683000 | 2.351394000  | 8                     | -5.351099000 | 1.075866000  | -2.244029000 |
| 6                    | -5.079383000 | 0.886661000  | -1.552628000 | 8                     | -5.349384000 | 1.075017000  | 2.244814000  |
| 8                    | -5.382404000 | 1.632572000  | -2.374619000 | 6                     | -4.941774000 | 0.369918000  | -1.426210000 |
| 6                    | -4.679859000 | -2.172543000 | -1.546147000 | 6                     | -4.940856000 | 0.369372000  | 1.426334000  |
| 8                    | -4.797698000 | -2.990065000 | -2.351894000 | 17                    | -3.559206000 | 3.205046000  | 0.000176000  |
| 6                    | -5.079094000 | 0.886532000  | 1.553032000  |                       |              |              |              |
| 8                    | -5.381886000 | 1.632623000  | 2.374945000  |                       |              |              |              |
| 17                   | -3.346840000 | 3.418612000  | -0.000090000 |                       |              |              |              |
| $(Cl^-C_{60})TiCl_3$ |              |              |              | $(Cl^-C_{60})V(CO)_2$ |              |              |              |
| 22                   | -4.603922000 | -0.581031000 | -0.005179000 | 6                     | -0.505526000 | -0.764754000 | 3.185426000  |

|    |              |              |              |    |              |              |              |
|----|--------------|--------------|--------------|----|--------------|--------------|--------------|
| 17 | -4.981030000 | -1.708584000 | 1.839628000  | 6  | -1.219642000 | -1.674872000 | 2.343575000  |
| 17 | -5.516064000 | 1.399271000  | 0.023883000  | 6  | -0.733510000 | 0.624967000  | 3.079406000  |
| 17 | -5.166720000 | -1.683772000 | -1.816551000 | 6  | -2.111515000 | -1.158613000 | 1.385759000  |
| 6  | 0.538831000  | 0.064947000  | 3.495608000  | 6  | -2.233045000 | -1.741963000 | 0.068027000  |
| 6  | 0.926187000  | -1.312874000 | 3.309243000  | 6  | -0.322939000 | -2.740334000 | 1.944279000  |
| 6  | -0.674807000 | 0.520026000  | 2.974038000  | 6  | -0.377948000 | -3.264465000 | 0.650847000  |
| 6  | 0.084355000  | -2.184922000 | 2.612506000  | 6  | -1.339516000 | -2.776427000 | -0.314153000 |
| 6  | 0.641478000  | -3.122932000 | 1.663487000  | 6  | 1.683652000  | 1.057842000  | 3.278447000  |
| 6  | 2.352906000  | -1.349388000 | 3.079017000  | 6  | 1.917642000  | -0.370698000 | 3.380060000  |
| 6  | 2.887644000  | -2.255510000 | 2.164480000  | 6  | 0.389047000  | 1.545581000  | 3.130188000  |
| 6  | 2.017286000  | -3.161309000 | 1.446522000  | 6  | 0.844105000  | -1.261125000 | 3.330762000  |
| 6  | 0.384209000  | 2.589804000  | 2.208298000  | 6  | 0.957377000  | -2.484638000 | 2.567892000  |
| 6  | 1.639116000  | 2.125475000  | 2.737468000  | 6  | 3.136810000  | -0.667304000 | 2.672713000  |
| 6  | -0.750990000 | 1.799395000  | 2.311393000  | 6  | 3.246171000  | -1.846670000 | 1.933103000  |
| 6  | 1.720166000  | 0.882042000  | 3.376862000  | 6  | 2.136893000  | -2.769399000 | 1.879688000  |
| 6  | 2.844658000  | 0.011789000  | 3.119658000  | 6  | 1.169920000  | 3.192101000  | 1.477368000  |
| 6  | 2.687634000  | 2.538511000  | 1.830096000  | 6  | 2.514033000  | 2.689391000  | 1.629676000  |
| 6  | 3.776961000  | 1.701440000  | 1.592059000  | 6  | 0.124713000  | 2.629134000  | 2.213238000  |
| 6  | 3.853984000  | 0.413115000  | 2.245196000  | 6  | 2.767072000  | 1.637195000  | 2.514941000  |
| 6  | -1.578595000 | 2.553535000  | -0.005201000 | 6  | 3.663734000  | 0.573738000  | 2.138780000  |
| 6  | -0.211298000 | 3.206648000  | -0.113483000 | 6  | 3.147621000  | 2.703607000  | 0.330356000  |
| 6  | -1.673465000 | 1.680827000  | 1.198950000  | 6  | 4.012617000  | 1.670661000  | -0.035027000 |
| 6  | 0.658616000  | 3.296866000  | 0.955062000  | 6  | 4.275692000  | 0.587940000  | 0.884542000  |
| 6  | 2.080480000  | 3.261796000  | 0.736639000  | 6  | -1.354146000 | 2.702922000  | 0.259616000  |
| 6  | 0.305303000  | 3.034006000  | -1.433772000 | 6  | -0.270693000 | 3.249738000  | -0.505643000 |
| 6  | 1.684315000  | 3.016339000  | -1.667565000 | 6  | -1.150255000 | 2.379954000  | 1.588468000  |
| 6  | 2.591414000  | 3.131686000  | -0.558889000 | 6  | 0.966801000  | 3.511544000  | 0.089024000  |
| 6  | -2.525946000 | -0.293137000 | -0.089859000 | 6  | 2.191789000  | 3.215530000  | -0.625863000 |
| 6  | -2.098193000 | 0.431951000  | -1.322467000 | 6  | -0.327579000 | 2.696076000  | -1.839732000 |
| 6  | -2.130541000 | 0.374302000  | 1.155804000  | 6  | 0.854556000  | 2.426121000  | -2.534546000 |
| 6  | -1.633268000 | 1.732168000  | -1.280283000 | 6  | 2.136761000  | 2.683478000  | -1.910465000 |
| 6  | -0.562862000 | 2.121862000  | -2.147358000 | 6  | -2.337872000 | 0.258821000  | 1.286979000  |
| 6  | -1.518207000 | -0.514645000 | -2.235923000 | 6  | -2.648470000 | 0.592121000  | -0.088864000 |
| 6  | -0.509443000 | -0.122238000 | -3.120275000 | 6  | -1.682945000 | 1.142728000  | 2.155253000  |
| 6  | -0.021147000 | 1.227290000  | -3.075187000 | 6  | -2.288926000 | 1.928600000  | -0.653958000 |
| 6  | -1.165714000 | -1.704799000 | 2.076297000  | 6  | -1.447110000 | 1.800961000  | -1.912480000 |
| 6  | -1.386359000 | -2.363114000 | 0.790621000  | 6  | -2.476119000 | -0.627451000 | -0.867355000 |
| 6  | -1.532839000 | -0.379572000 | 2.252464000  | 6  | -1.868222000 | -0.634255000 | -2.135615000 |
| 6  | -1.976173000 | -1.672440000 | -0.260905000 | 6  | -1.325638000 | 0.625736000  | -2.631846000 |
| 6  | -1.447460000 | -1.802407000 | -1.588766000 | 6  | 2.310412000  | 0.711471000  | -3.155624000 |
| 6  | -0.268770000 | -3.231419000 | 0.543491000  | 6  | 0.966508000  | 1.214642000  | -3.303724000 |
| 6  | 0.231731000  | -3.385721000 | -0.754747000 | 6  | -0.110074000 | 0.326874000  | -3.346326000 |
| 6  | -0.370315000 | -2.659654000 | -1.840946000 | 6  | 2.526646000  | -0.665960000 | -3.054625000 |
| 6  | 1.798884000  | -0.181120000 | -3.485882000 | 6  | 4.183384000  | -0.305369000 | -1.275246000 |
| 6  | 0.611470000  | -0.998712000 | -3.369687000 | 6  | 3.956557000  | 1.118314000  | -1.371330000 |
| 6  | 0.680849000  | -2.244023000 | -2.742731000 | 6  | 3.035846000  | 1.618043000  | -2.293724000 |
| 6  | 3.013415000  | -0.636826000 | -2.969702000 | 6  | 3.480070000  | -1.181396000 | -2.104644000 |
| 6  | 3.501111000  | 1.605506000  | -2.080421000 | 6  | 3.155882000  | -2.739898000 | -0.225097000 |
| 6  | 2.244580000  | 2.073990000  | -2.613018000 | 6  | 3.878435000  | -1.827861000 | 0.632685000  |
| 6  | 1.407741000  | 1.197251000  | -3.302266000 | 6  | 4.384951000  | -0.634044000 | 0.118156000  |
| 6  | 3.878844000  | 0.272469000  | -2.252726000 | 6  | 2.953344000  | -2.420601000 | -1.568678000 |
| 6  | 4.688191000  | 0.177001000  | 0.070554000  | 6  | 0.637383000  | -3.235572000 | -1.449371000 |
| 6  | 4.296325000  | 1.555509000  | 0.249310000  | 6  | 0.846330000  | -3.567187000 | -0.058779000 |
| 6  | 3.715013000  | 2.259692000  | -0.805681000 | 6  | 2.079687000  | -3.321650000 | 0.542990000  |
| 6  | 4.482715000  | -0.454331000 | -1.159540000 | 6  | 1.676869000  | -2.674667000 | -2.189246000 |
| 6  | 3.719878000  | -2.490906000 | -0.009814000 | 6  | 0.115286000  | -1.094743000 | -3.249972000 |
| 6  | 3.938533000  | -1.840349000 | 1.261083000  | 6  | -0.980853000 | -1.680885000 | -2.491197000 |
| 6  | 4.413479000  | -0.529009000 | 1.300783000  | 6  | -0.719717000 | -2.748809000 | -1.597848000 |
| 6  | 3.990797000  | -1.811016000 | -1.200752000 | 6  | 1.408792000  | -1.582970000 | -3.108122000 |
| 6  | 1.937031000  | -2.715571000 | -2.210346000 | 23 | -4.245604000 | -0.738646000 | 0.334159000  |
| 6  | 1.658364000  | -3.421157000 | -0.976694000 | 6  | -5.146468000 | -2.048493000 | -0.770953000 |
| 6  | 2.534486000  | -3.308712000 | 0.102607000  | 8  | -5.608200000 | -2.855839000 | -1.469865000 |
| 6  | 3.082500000  | -1.925300000 | -2.319088000 | 6  | -5.614923000 | 0.324273000  | 1.216383000  |
| 17 | -2.895259000 | 3.880023000  | 0.007168000  | 8  | -6.393192000 | 1.017411000  | 1.731855000  |

|                                                      |              |              |              | 17                                                   | -3.834024000 | 2.949063000  | -1.012531000 |
|------------------------------------------------------|--------------|--------------|--------------|------------------------------------------------------|--------------|--------------|--------------|
| (Cl <sup>-</sup> C <sub>60</sub> )V(CO) <sub>3</sub> |              |              |              | (Cl <sup>-</sup> C <sub>60</sub> )V(CO) <sub>4</sub> |              |              |              |
| 6                                                    | -0.457683000 | -0.482498000 | -3.150482000 | 6                                                    | -0.904190000 | 2.526691000  | -1.176791000 |
| 6                                                    | -1.359794000 | 0.446933000  | -2.557813000 | 6                                                    | -1.818117000 | 2.228926000  | -0.000222000 |
| 6                                                    | -0.381094000 | -1.820725000 | -2.704110000 | 6                                                    | -0.799757000 | 1.712153000  | -2.289422000 |
| 6                                                    | -2.104854000 | 0.043086000  | -1.438575000 | 6                                                    | -2.268520000 | 0.800415000  | -0.000124000 |
| 6                                                    | -2.399256000 | 0.912436000  | -0.320041000 | 6                                                    | -2.072733000 | -0.046066000 | 1.157345000  |
| 6                                                    | -0.690443000 | 1.743762000  | -2.473527000 | 6                                                    | -0.904235000 | 2.526903000  | 1.176298000  |
| 6                                                    | -0.866280000 | 2.573875000  | -1.381828000 | 6                                                    | -0.799755000 | 1.712523000  | 2.289042000  |
| 6                                                    | -1.893402000 | 2.321558000  | -0.291853000 | 6                                                    | -1.428285000 | 0.394766000  | 2.328161000  |
| 6                                                    | 2.073797000  | -1.776122000 | -2.905432000 | 6                                                    | 1.558374000  | 2.355365000  | -2.588941000 |
| 6                                                    | 1.997473000  | -0.404448000 | -3.370849000 | 6                                                    | 1.456005000  | 3.189817000  | -1.421137000 |
| 6                                                    | 0.906938000  | -2.464778000 | -2.573578000 | 6                                                    | 0.445841000  | 1.623990000  | -3.011339000 |
| 6                                                    | 0.763241000  | 0.228593000  | -3.489308000 | 6                                                    | 0.247945000  | 3.252133000  | -0.722859000 |
| 6                                                    | 0.612756000  | 1.602751000  | -3.074801000 | 6                                                    | 0.247936000  | 3.252254000  | 0.722252000  |
| 6                                                    | 3.130701000  | 0.315354000  | -2.833219000 | 6                                                    | 2.708214000  | 3.108189000  | -0.695980000 |
| 6                                                    | 2.987156000  | 1.647981000  | -2.434561000 | 6                                                    | 2.708198000  | 3.108300000  | 0.695405000  |
| 6                                                    | 1.707201000  | 2.301731000  | -2.559635000 | 6                                                    | 1.455986000  | 3.190072000  | 1.420546000  |
| 6                                                    | 2.009439000  | -3.412351000 | -0.587092000 | 6                                                    | 1.862321000  | -0.329651000 | -3.456533000 |
| 6                                                    | 3.215350000  | -2.697753000 | -0.932662000 | 6                                                    | 3.015616000  | 0.423384000  | -3.015394000 |
| 6                                                    | 0.876256000  | -3.301025000 | -1.393256000 | 6                                                    | 0.602955000  | 0.260527000  | -3.453869000 |
| 6                                                    | 3.244542000  | -1.893150000 | -2.073424000 | 6                                                    | 2.865907000  | 1.746514000  | -2.590087000 |
| 6                                                    | 3.900454000  | -0.600906000 | -2.030201000 | 6                                                    | 3.579258000  | 2.211119000  | -1.420893000 |
| 6                                                    | 3.831491000  | -2.237481000 | 0.292085000  | 6                                                    | 3.886342000  | -0.473832000 | -2.298078000 |
| 6                                                    | 4.461955000  | -0.993950000 | 0.334375000  | 6                                                    | 4.575069000  | -0.024923000 | -1.169791000 |
| 6                                                    | 4.498071000  | -0.161419000 | -0.847676000 | 6                                                    | 4.418288000  | 1.340250000  | -0.723756000 |
| 6                                                    | -0.557248000 | -3.141420000 | 0.602442000  | 6                                                    | -0.397601000 | -1.836311000 | -2.589917000 |
| 6                                                    | 0.617341000  | -3.264809000 | 1.438971000  | 6                                                    | 0.920205000  | -2.436131000 | -2.588607000 |
| 6                                                    | -0.428702000 | -3.164289000 | -0.787063000 | 6                                                    | -0.559325000 | -0.496019000 | -3.013544000 |
| 6                                                    | 1.876288000  | -3.393327000 | 0.854109000  | 6                                                    | 2.026254000  | -1.702895000 | -3.015369000 |
| 6                                                    | 3.002299000  | -2.667618000 | 1.395175000  | 6                                                    | 3.272998000  | -1.786947000 | -2.296329000 |
| 6                                                    | 0.433129000  | -2.399670000 | 2.581380000  | 6                                                    | 1.027366000  | -3.283611000 | -1.422327000 |
| 6                                                    | 1.519022000  | -1.698644000 | 3.100024000  | 6                                                    | 2.231715000  | -3.362609000 | -0.723422000 |
| 6                                                    | 2.823622000  | -1.833828000 | 2.499947000  | 6                                                    | 3.376780000  | -2.603164000 | -1.168513000 |
| 6                                                    | -2.043971000 | -1.323349000 | -0.983218000 | 6                                                    | -2.072816000 | -0.046276000 | -1.157446000 |
| 6                                                    | -2.208566000 | -1.316820000 | 0.450103000  | 6                                                    | -1.914768000 | -1.415810000 | -0.719247000 |
| 6                                                    | -1.194857000 | -2.250528000 | -1.611923000 | 6                                                    | -1.428268000 | 0.394365000  | -2.328277000 |
| 6                                                    | -1.465692000 | -2.220188000 | 1.251296000  | 6                                                    | -1.094035000 | -2.309602000 | -1.438832000 |
| 6                                                    | -0.859910000 | -1.755381000 | 2.452794000  | 6                                                    | -0.221627000 | -3.196856000 | -0.697654000 |
| 6                                                    | -2.344831000 | 0.075507000  | 0.862366000  | 6                                                    | -1.914662000 | -1.415658000 | 0.719395000  |
| 6                                                    | -1.775194000 | 0.504597000  | 2.076722000  | 6                                                    | -1.094041000 | -2.309336000 | 1.439203000  |
| 6                                                    | -1.012018000 | -0.404672000 | 2.852202000  | 6                                                    | -0.221619000 | -3.196736000 | 0.698178000  |
| 6                                                    | 2.578504000  | 0.393426000  | 3.172459000  | 6                                                    | 3.376776000  | -2.602962000 | 1.168962000  |
| 6                                                    | 1.364320000  | -0.314029000 | 3.513371000  | 6                                                    | 2.231714000  | -3.362482000 | 0.723997000  |
| 6                                                    | 0.132339000  | 0.317650000  | 3.389450000  | 6                                                    | 1.027354000  | -3.283368000 | 1.422882000  |
| 6                                                    | 2.516161000  | 1.715935000  | 2.723727000  | 6                                                    | 3.272982000  | -1.786547000 | 2.296635000  |
| 6                                                    | 4.215888000  | 1.232429000  | 1.010239000  | 6                                                    | 4.575060000  | -0.024715000 | 1.169785000  |
| 6                                                    | 4.283498000  | -0.131653000 | 1.481585000  | 6                                                    | 4.676157000  | -0.869266000 | 0.000072000  |
| 6                                                    | 3.478785000  | -0.542735000 | 2.545692000  | 6                                                    | 4.086871000  | -2.133511000 | 0.000184000  |
| 6                                                    | 3.347880000  | 2.139923000  | 1.619256000  | 6                                                    | 3.886324000  | -0.473426000 | 2.298147000  |
| 6                                                    | 2.704485000  | 3.038419000  | -0.576806000 | 6                                                    | 2.865890000  | 1.746968000  | 2.589758000  |
| 6                                                    | 3.606838000  | 2.103094000  | -1.210369000 | 6                                                    | 3.579242000  | 2.211366000  | 1.420485000  |
| 6                                                    | 4.347718000  | 1.213473000  | -0.430713000 | 6                                                    | 4.418281000  | 1.340376000  | 0.723506000  |
| 6                                                    | 2.578434000  | 3.057189000  | 0.808971000  | 6                                                    | 3.015594000  | 0.423911000  | 3.015300000  |
| 6                                                    | 0.132178000  | 3.284988000  | 0.608115000  | 6                                                    | 0.602931000  | 0.261131000  | 3.453796000  |
| 6                                                    | 0.263972000  | 3.264807000  | -0.830927000 | 6                                                    | 0.445825000  | 1.624512000  | 3.011008000  |
| 6                                                    | 1.528336000  | 3.154480000  | -1.414870000 | 6                                                    | 1.558356000  | 2.355815000  | 2.588493000  |
| 6                                                    | 1.269069000  | 3.190181000  | 1.414676000  | 6                                                    | 1.862298000  | -0.329049000 | 3.456576000  |
| 6                                                    | 0.065459000  | 1.679931000  | 2.921376000  | 6                                                    | 0.920189000  | -2.435682000 | 2.589016000  |
| 6                                                    | -1.103295000 | 1.799386000  | 2.085258000  | 6                                                    | -0.397615000 | -1.835858000 | 2.590219000  |
| 6                                                    | -1.080860000 | 2.604449000  | 0.961076000  | 6                                                    | -0.559343000 | -0.495499000 | 3.013596000  |
| 6                                                    | 1.235960000  | 2.368357000  | 2.596150000  | 6                                                    | 2.026240000  | -1.702373000 | 3.015664000  |

|                          |              |              |              |                         |              |              |              |
|--------------------------|--------------|--------------|--------------|-------------------------|--------------|--------------|--------------|
| 23                       | -4.163125000 | -0.399001000 | -0.317341000 | 23                      | -4.029504000 | -0.505877000 | -0.000009000 |
| 6                        | -5.366545000 | 0.952668000  | 0.377211000  | 6                       | -4.889793000 | -1.777434000 | 1.204372000  |
| 8                        | -6.087272000 | 1.743826000  | 0.824052000  | 8                       | -5.384064000 | -2.530183000 | 1.934779000  |
| 6                        | -5.179790000 | -1.804807000 | -1.217862000 | 6                       | -5.064988000 | 0.633368000  | -1.188303000 |
| 8                        | -5.759986000 | -2.667822000 | -1.733850000 | 8                       | -5.668707000 | 1.321168000  | -1.898345000 |
| 6                        | -4.996780000 | -1.302760000 | 1.155505000  | 6                       | -4.889953000 | -1.776950000 | -1.204825000 |
| 8                        | -5.497702000 | -1.838730000 | 2.058903000  | 8                       | -5.384358000 | -2.529189000 | -1.935667000 |
| 17                       | -3.276007000 | 3.586349000  | -0.443330000 | 6                       | -5.063774000 | 0.633376000  | 1.189489000  |
|                          |              |              |              | 8                       | -5.666589000 | 1.321221000  | 1.900221000  |
|                          |              |              |              | 17                      | -3.254042000 | 3.435500000  | -0.000430000 |
| $(Cl^-C_{60})Cr(CO)_2Cl$ |              |              |              | $(Cl^-C_{60})Cr(CO)_2H$ |              |              |              |
| 6                        | 2.592831000  | 2.001476000  | 2.508987000  | 6                       | -1.468779000 | 1.233627000  | 0.409958000  |
| 6                        | 3.286485000  | 2.451822000  | 1.321797000  | 6                       | -0.927038000 | 0.304906000  | 1.353577000  |
| 6                        | 2.827786000  | 0.716801000  | 3.005956000  | 6                       | -1.949434000 | -0.885743000 | -0.338826000 |
| 6                        | 4.189522000  | 1.604675000  | 0.678193000  | 6                       | -2.098235000 | 0.489810000  | -0.617599000 |
| 6                        | 4.205435000  | 1.528588000  | -0.766756000 | 6                       | -1.220063000 | -1.007453000 | 0.882353000  |
| 6                        | 2.365890000  | 3.249297000  | 0.544140000  | 24                      | 0.058809000  | -0.015164000 | -0.484412000 |
| 6                        | 2.379159000  | 3.173293000  | -0.846134000 | 1                       | 0.292754000  | -1.286827000 | -1.436611000 |
| 6                        | 3.317031000  | 2.301995000  | -1.515234000 | 8                       | 2.202659000  | -1.949275000 | 0.210918000  |
| 6                        | 0.425480000  | 0.414179000  | 3.433318000  | 8                       | 2.221185000  | 1.988076000  | 0.109384000  |
| 6                        | 0.180948000  | 1.739657000  | 2.920268000  | 6                       | 1.385644000  | -1.160818000 | -0.071053000 |
| 6                        | 1.722079000  | -0.088293000 | 3.476123000  | 6                       | 1.374440000  | 1.226917000  | -0.147403000 |
| 6                        | 1.247349000  | 2.519225000  | 2.465991000  | 1                       | -1.424381000 | 2.312043000  | 0.478244000  |
| 6                        | 1.103420000  | 3.281759000  | 1.252864000  | 1                       | -2.564770000 | 0.904954000  | -1.503317000 |
| 6                        | -1.059395000 | 1.706411000  | 2.184063000  | 1                       | -2.315280000 | -1.702018000 | -0.945752000 |
| 6                        | -1.196641000 | 2.444353000  | 1.023626000  | 1                       | -0.957730000 | -1.934354000 | 1.373767000  |
| 6                        | -0.097597000 | 3.226483000  | 0.541640000  | 1                       | -0.411972000 | 0.552265000  | 2.271103000  |
| 6                        | 0.932539000  | -2.297494000 | 2.709253000  |                         |              |              |              |
| 6                        | -0.415784000 | -1.782171000 | 2.661567000  |                         |              |              |              |
| 6                        | 1.981731000  | -1.466566000 | 3.104617000  |                         |              |              |              |
| 6                        | -0.675439000 | -0.441001000 | 3.020265000  |                         |              |              |              |
| 6                        | -1.590395000 | 0.350483000  | 2.271656000  |                         |              |              |              |
| 6                        | -1.071603000 | -2.368525000 | 1.531601000  |                         |              |              |              |
| 6                        | -1.926118000 | -1.568545000 | 0.761620000  |                         |              |              |              |
| 6                        | -2.222543000 | -0.200984000 | 1.136152000  |                         |              |              |              |
| 6                        | 3.407233000  | -2.369406000 | 1.319754000  |                         |              |              |              |
| 6                        | 2.322099000  | -3.229999000 | 0.906104000  |                         |              |              |              |
| 6                        | 3.240172000  | -1.505414000 | 2.404232000  |                         |              |              |              |
| 6                        | 1.107347000  | -3.197446000 | 1.589900000  |                         |              |              |              |
| 6                        | -0.135925000 | -3.237747000 | 0.851662000  |                         |              |              |              |
| 6                        | 2.339268000  | -3.305948000 | -0.538444000 |                         |              |              |              |
| 6                        | 1.140528000  | -3.345604000 | -1.250747000 |                         |              |              |              |
| 6                        | -0.119630000 | -3.308888000 | -0.542495000 |                         |              |              |              |
| 6                        | 4.432982000  | 0.278438000  | 1.197160000  |                         |              |              |              |
| 6                        | 4.602786000  | -0.616789000 | 0.073813000  |                         |              |              |              |
| 6                        | 3.764537000  | -0.156074000 | 2.342732000  |                         |              |              |              |
| 6                        | 4.098815000  | -1.916654000 | 0.134771000  |                         |              |              |              |
| 6                        | 3.435415000  | -2.493459000 | -1.013194000 |                         |              |              |              |
| 6                        | 4.459351000  | 0.156123000  | -1.138845000 |                         |              |              |              |
| 6                        | 3.813828000  | -0.397155000 | -2.247148000 |                         |              |              |              |
| 6                        | 3.291014000  | -1.746832000 | -2.183532000 |                         |              |              |              |
| 6                        | -0.362792000 | -2.061794000 | -2.507479000 |                         |              |              |              |
| 6                        | 0.990387000  | -2.568592000 | -2.462123000 |                         |              |              |              |
| 6                        | 2.051166000  | -1.785869000 | -2.919236000 |                         |              |              |              |
| 6                        | -0.611408000 | -0.761551000 | -2.999971000 |                         |              |              |              |
| 6                        | -2.167362000 | -0.318933000 | -1.181503000 |                         |              |              |              |
| 6                        | -1.918026000 | -1.644577000 | -0.670702000 |                         |              |              |              |
| 6                        | -1.039656000 | -2.517871000 | -1.333446000 |                         |              |              |              |
| 6                        | -1.550346000 | 0.103278000  | -2.366728000 |                         |              |              |              |
| 6                        | -1.180890000 | 2.326952000  | -1.324874000 |                         |              |              |              |
| 6                        | -2.083084000 | 2.030836000  | -0.138826000 |                         |              |              |              |
| 6                        | -2.454069000 | 0.575539000  | -0.076033000 |                         |              |              |              |

|                              |              |              |              |                              |              |              |              |
|------------------------------|--------------|--------------|--------------|------------------------------|--------------|--------------|--------------|
| 6                            | -1.008572000 | 1.460587000  | -2.388809000 |                              |              |              |              |
| 6                            | 1.303998000  | 2.247788000  | -2.705606000 |                              |              |              |              |
| 6                            | 1.133442000  | 3.134449000  | -1.585996000 |                              |              |              |              |
| 6                            | -0.083805000 | 3.149556000  | -0.901668000 |                              |              |              |              |
| 6                            | 0.248074000  | 1.419113000  | -3.094852000 |                              |              |              |              |
| 6                            | 1.799261000  | -0.453543000 | -3.430414000 |                              |              |              |              |
| 6                            | 2.893011000  | 0.399189000  | -3.018570000 |                              |              |              |              |
| 6                            | 2.648563000  | 1.728528000  | -2.663292000 |                              |              |              |              |
| 6                            | 0.501208000  | 0.049024000  | -3.467128000 |                              |              |              |              |
| 24                           | -4.095284000 | -0.708059000 | 0.068834000  |                              |              |              |              |
| 17                           | -5.100184000 | -2.637133000 | -0.273803000 |                              |              |              |              |
| 8                            | -5.838235000 | 1.025963000  | -1.643177000 |                              |              |              |              |
| 8                            | -5.846368000 | 0.657053000  | 2.059056000  |                              |              |              |              |
| 6                            | -5.131334000 | 0.378279000  | -0.991600000 |                              |              |              |              |
| 6                            | -5.158678000 | 0.109279000  | 1.297492000  |                              |              |              |              |
| 17                           | -3.568218000 | 3.161069000  | -0.160234000 |                              |              |              |              |
| $(Cl^- C_{60})Mn(CO)_2NMe_3$ |              |              |              | $(Cl^- C_{60})Mn(CO)_2PMe_3$ |              |              |              |
| 25                           | -3.839176000 | -0.020885000 | 0.165329000  | 25                           | -3.708370000 | 0.244129000  | 0.265659000  |
| 7                            | -5.063189000 | -1.692157000 | -0.395644000 | 15                           | -5.005432000 | -1.477585000 | -0.323706000 |
| 8                            | -5.634690000 | 1.864447000  | -1.188358000 | 8                            | -5.474701000 | 2.060978000  | -1.215714000 |
| 8                            | -5.184538000 | 0.428983000  | 2.719005000  | 8                            | -5.224936000 | 0.636378000  | 2.741100000  |
| 6                            | -4.910445000 | 1.126607000  | -0.647679000 | 6                            | -4.765200000 | 1.352242000  | -0.619655000 |
| 6                            | -4.666753000 | 0.249149000  | 1.686428000  | 6                            | -4.630141000 | 0.483862000  | 1.747125000  |
| 6                            | -6.478738000 | -1.461525000 | -0.036995000 | 6                            | -6.785361000 | -1.272771000 | 0.018559000  |
| 1                            | -6.570725000 | -1.344418000 | 1.043751000  | 1                            | -6.940209000 | -1.142839000 | 1.092265000  |
| 1                            | -6.839965000 | -0.553555000 | -0.522453000 | 1                            | -7.152617000 | -0.375809000 | -0.486640000 |
| 6                            | -4.988351000 | -1.873425000 | -1.860511000 | 6                            | -4.983030000 | -1.844630000 | -2.115256000 |
| 1                            | -3.957724000 | -2.081974000 | -2.156278000 | 1                            | -3.965258000 | -2.088264000 | -2.433461000 |
| 1                            | -5.625010000 | -2.711094000 | -2.179379000 | 1                            | -5.640508000 | -2.683877000 | -2.361796000 |
| 6                            | -4.625813000 | -2.939447000 | 0.262988000  | 6                            | -4.629245000 | -3.098076000 | 0.434909000  |
| 1                            | -5.295688000 | -3.770127000 | -0.001561000 | 1                            | -5.326095000 | -3.869260000 | 0.092950000  |
| 1                            | -4.634658000 | -2.802412000 | 1.346269000  | 1                            | -4.692431000 | -3.019632000 | 1.523041000  |
| 1                            | -3.612353000 | -3.192027000 | -0.055186000 | 1                            | -3.611891000 | -3.403610000 | 0.174273000  |
| 1                            | -7.097076000 | -2.311061000 | -0.359976000 | 1                            | -7.364697000 | -2.134982000 | -0.324030000 |
| 1                            | -5.325771000 | -0.962225000 | -2.359276000 | 1                            | -5.311431000 | -0.962053000 | -2.670515000 |
| 6                            | 3.928534000  | -2.428633000 | 0.170768000  | 6                            | 3.858066000  | -2.608426000 | 0.209672000  |
| 6                            | 3.185218000  | -2.731221000 | 1.373260000  | 6                            | 3.145310000  | -2.792778000 | 1.454013000  |
| 6                            | 4.642960000  | -1.234710000 | 0.069482000  | 6                            | 4.645409000  | -1.473730000 | 0.014247000  |
| 6                            | 3.169704000  | -1.820036000 | 2.430677000  | 6                            | 3.234440000  | -1.827126000 | 2.458095000  |
| 6                            | 1.944280000  | -1.554302000 | 3.142724000  | 6                            | 2.058412000  | -1.439187000 | 3.197288000  |
| 6                            | 1.964759000  | -3.401911000 | 0.989199000  | 6                            | 1.868723000  | -3.399025000 | 1.154176000  |
| 6                            | 0.779893000  | -3.145197000 | 1.678281000  | 6                            | 0.732373000  | -3.024153000 | 1.870137000  |
| 6                            | 0.765018000  | -2.199497000 | 2.773285000  | 6                            | 0.825764000  | -2.022042000 | 2.909336000  |
| 6                            | 3.881476000  | -0.945552000 | -2.254754000 | 6                            | 3.810285000  | -1.259344000 | -2.292609000 |
| 6                            | 3.137704000  | -2.185221000 | -2.147887000 | 6                            | 2.990832000  | -2.437205000 | -2.087869000 |
| 6                            | 4.618360000  | -0.480216000 | -1.163978000 | 6                            | 4.620874000  | -0.787273000 | -1.258545000 |
| 6                            | 3.166027000  | -2.914866000 | -0.957855000 | 6                            | 3.019216000  | -3.101528000 | -0.860249000 |
| 6                            | 1.953179000  | -3.515258000 | -0.453880000 | 6                            | 1.791018000  | -3.589982000 | -0.278647000 |
| 6                            | 1.901431000  | -2.032727000 | -2.873673000 | 6                            | 1.738630000  | -2.240269000 | -2.774699000 |
| 6                            | 0.729008000  | -2.615230000 | -2.391115000 | 6                            | 0.551440000  | -2.712604000 | -2.215738000 |
| 6                            | 0.757757000  | -3.372092000 | -1.159120000 | 6                            | 0.580325000  | -3.402316000 | -0.945974000 |
| 6                            | 3.852066000  | 1.817742000  | -1.593917000 | 6                            | 3.991716000  | 1.531130000  | -1.790062000 |
| 6                            | 3.088597000  | 1.336491000  | -2.724109000 | 6                            | 3.152746000  | 1.042950000  | -2.862011000 |
| 6                            | 4.603799000  | 0.924883000  | -0.828572000 | 6                            | 4.713268000  | 0.631681000  | -1.003480000 |
| 6                            | 3.101117000  | -0.024737000 | -3.042274000 | 6                            | 3.061234000  | -0.331262000 | -3.101982000 |
| 6                            | 1.874620000  | -0.690711000 | -3.424158000 | 6                            | 1.778683000  | -0.931044000 | -3.399697000 |
| 6                            | 1.848566000  | 2.071744000  | -2.771104000 | 6                            | 1.963451000  | 1.858191000  | -2.905643000 |
| 6                            | 0.664568000  | 1.426091000  | -3.135603000 | 6                            | 0.725736000  | 1.275934000  | -3.188389000 |
| 6                            | 0.680034000  | 0.021865000  | -3.470080000 | 6                            | 0.633659000  | -0.141821000 | -3.441976000 |
| 6                            | 3.872309000  | 2.044314000  | 1.238397000  | 6                            | 4.142359000  | 1.909108000  | 1.022145000  |
| 6                            | 3.090094000  | 2.963895000  | 0.443166000  | 6                            | 3.391600000  | 2.835684000  | 0.205283000  |
| 6                            | 4.614241000  | 1.040418000  | 0.613861000  | 6                            | 4.789436000  | 0.824085000  | 0.428819000  |

|                        |              |              |              |                          |              |              |              |
|------------------------|--------------|--------------|--------------|--------------------------|--------------|--------------|--------------|
| 6                      | 3.082181000  | 2.854769000  | -0.944373000 | 6                        | 3.319196000  | 2.651601000  | -1.172028000 |
| 6                      | 1.839045000  | 3.002548000  | -1.673617000 | 6                        | 2.060107000  | 2.845253000  | -1.862369000 |
| 6                      | 1.859513000  | 3.231744000  | 1.159480000  | 6                        | 2.211038000  | 3.225792000  | 0.950102000  |
| 6                      | 0.657301000  | 3.356301000  | 0.458412000  | 6                        | 0.992650000  | 3.395542000  | 0.287892000  |
| 6                      | 0.648000000  | 3.240762000  | -0.982298000 | 6                        | 0.916921000  | 3.202128000  | -1.142461000 |
| 6                      | 3.912153000  | -0.579430000 | 2.327190000  | 6                        | 4.052631000  | -0.647900000 | 2.256807000  |
| 6                      | 3.142081000  | 0.455768000  | 2.970185000  | 6                        | 3.379409000  | 0.471053000  | 2.867618000  |
| 6                      | 4.635759000  | -0.293979000 | 1.167794000  | 6                        | 4.745441000  | -0.476219000 | 1.056779000  |
| 6                      | 3.124530000  | 1.749418000  | 2.440640000  | 6                        | 3.426026000  | 1.731943000  | 2.265818000  |
| 6                      | 1.885536000  | 2.486101000  | 2.389971000  | 6                        | 2.237400000  | 2.547749000  | 2.218902000  |
| 6                      | 1.921647000  | -0.139679000 | 3.468420000  | 6                        | 2.143166000  | -0.010731000 | 3.443534000  |
| 6                      | 0.728851000  | 0.573135000  | 3.415278000  | 6                        | 0.999061000  | 0.778471000  | 3.394777000  |
| 6                      | 0.708457000  | 1.904558000  | 2.866286000  | 6                        | 1.044491000  | 2.076751000  | 2.772004000  |
| 6                      | -1.508175000 | 2.496385000  | -0.181789000 | 6                        | -1.249225000 | 2.650665000  | -0.221574000 |
| 6                      | -0.560745000 | 2.794387000  | 0.968488000  | 6                        | -0.238371000 | 2.946509000  | 0.874194000  |
| 6                      | -0.528893000 | 2.058164000  | 2.139400000  | 6                        | -0.208356000 | 2.275908000  | 2.083967000  |
| 6                      | -2.098927000 | 1.125781000  | -0.068802000 | 6                        | -1.912509000 | 1.328233000  | -0.007249000 |
| 6                      | -1.313735000 | 0.448330000  | -2.352995000 | 6                        | -1.281455000 | 0.481307000  | -2.281601000 |
| 6                      | -0.558794000 | 1.697605000  | -2.423325000 | 6                        | -0.447452000 | 1.668524000  | -2.448057000 |
| 6                      | -0.573587000 | 2.602024000  | -1.377087000 | 6                        | -0.359872000 | 2.627841000  | -1.455104000 |
| 6                      | -1.985534000 | 0.175186000  | -1.153213000 | 6                        | -1.920810000 | 0.320560000  | -1.041277000 |
| 6                      | -1.254194000 | -2.190956000 | -1.254820000 | 6                        | -1.355351000 | -2.097194000 | -1.036451000 |
| 6                      | -0.520026000 | -1.886368000 | -2.443300000 | 6                        | -0.649500000 | -1.904360000 | -2.262271000 |
| 6                      | -0.548686000 | -0.577922000 | -2.976006000 | 6                        | -0.613028000 | -0.626881000 | -2.869796000 |
| 6                      | -1.960682000 | -1.158830000 | -0.604241000 | 6                        | -1.974005000 | -0.985612000 | -0.419682000 |
| 6                      | -1.229409000 | -1.960227000 | 1.614713000  | 6                        | -1.196423000 | -1.711062000 | 1.815735000  |
| 6                      | -0.458886000 | -2.989897000 | 0.948617000  | 6                        | -0.522791000 | -2.824628000 | 1.179747000  |
| 6                      | -0.469382000 | -3.100192000 | -0.443802000 | 6                        | -0.597007000 | -3.008105000 | -0.203087000 |
| 6                      | -1.983609000 | -1.058878000 | 0.832039000  | 6                        | -1.915739000 | -0.801084000 | 1.010202000  |
| 6                      | -1.294866000 | 0.826780000  | 2.291409000  | 6                        | -1.046528000 | 1.107641000  | 2.333000000  |
| 6                      | -0.511597000 | -0.091481000 | 3.035700000  | 6                        | -0.296636000 | 0.180138000  | 3.100339000  |
| 6                      | -0.488280000 | -1.476027000 | 2.731299000  | 6                        | -0.377343000 | -1.216631000 | 2.870729000  |
| 6                      | -1.999403000 | 0.365618000  | 1.152943000  | 6                        | -1.818277000 | 0.631502000  | 1.248136000  |
| 17                     | -2.807216000 | 3.844680000  | -0.292231000 | 17                       | -2.471785000 | 4.064951000  | -0.360391000 |
| $(Cl^-C_{60})Mn(CO)_3$ |              |              |              | $(Cl^-C_{60})Fe(CO)_2Cl$ |              |              |              |
| 25                     | -4.099375000 | -0.593906000 | -0.008136000 | 6                        | 2.701024000  | 1.793134000  | 2.589066000  |
| 6                      | -5.005625000 | -1.389389000 | 1.303129000  | 6                        | 3.403179000  | 2.274281000  | 1.420006000  |
| 8                      | -5.566154000 | -1.913178000 | 2.173131000  | 6                        | 2.881446000  | 0.474149000  | 3.015310000  |
| 6                      | -5.225980000 | 0.797410000  | 0.002358000  | 6                        | 4.261825000  | 1.422850000  | 0.723151000  |
| 8                      | -5.936800000 | 1.711706000  | 0.016859000  | 6                        | 4.261702000  | 1.422729000  | -0.723934000 |
| 6                      | -5.020971000 | -1.473875000 | -1.273794000 | 6                        | 2.510680000  | 3.150793000  | 0.695415000  |
| 8                      | -5.605439000 | -2.041938000 | -2.098674000 | 6                        | 2.510565000  | 3.150679000  | -0.696190000 |
| 6                      | -2.218746000 | -0.525156000 | -1.269176000 | 6                        | 3.402938000  | 2.274043000  | -1.420786000 |
| 6                      | -2.134513000 | -1.619662000 | -0.325996000 | 6                        | 0.473544000  | 0.255516000  | 3.458181000  |
| 6                      | -2.191578000 | -1.046057000 | 1.002582000  | 6                        | 0.285157000  | 1.615448000  | 3.011193000  |
| 6                      | -2.414994000 | 0.381460000  | 0.897446000  | 6                        | 1.746635000  | -0.305482000 | 3.458197000  |
| 6                      | -2.349520000 | 0.703520000  | -0.520566000 | 6                        | 1.380253000  | 2.372426000  | 2.587964000  |
| 6                      | -1.762416000 | 1.884772000  | -0.988234000 | 6                        | 1.257494000  | 3.203898000  | 1.420464000  |
| 6                      | -0.963632000 | 1.826881000  | -2.153189000 | 6                        | -0.959756000 | 1.676372000  | 2.288688000  |
| 6                      | -0.837944000 | 0.641108000  | -2.907533000 | 6                        | -1.088201000 | 2.490910000  | 1.177926000  |
| 6                      | -1.480296000 | -0.552214000 | -2.470052000 | 6                        | 0.046878000  | 3.239555000  | 0.722713000  |
| 6                      | -0.593240000 | -1.667139000 | -2.716691000 | 6                        | 0.851810000  | -2.432817000 | 2.589440000  |
| 6                      | -0.496670000 | -2.721355000 | -1.803514000 | 6                        | -0.477536000 | -1.862460000 | 2.592836000  |
| 6                      | -1.282778000 | -2.718555000 | -0.586184000 | 6                        | 1.941347000  | -1.673792000 | 3.015914000  |
| 6                      | -0.491157000 | -3.259476000 | 0.468078000  | 6                        | -0.669013000 | -0.529227000 | 3.020845000  |
| 6                      | -0.563159000 | -2.701123000 | 1.764382000  | 6                        | -1.555329000 | 0.342969000  | 2.329508000  |
| 6                      | -1.438541000 | -1.614630000 | 2.051659000  | 6                        | -1.165533000 | -2.351277000 | 1.440120000  |
| 6                      | -0.766558000 | -0.717180000 | 2.973510000  | 6                        | -1.996860000 | -1.474400000 | 0.721982000  |
| 6                      | -0.903811000 | 0.662188000  | 2.856421000  | 6                        | -2.169336000 | -0.112216000 | 1.156356000  |
| 6                      | -1.712431000 | 1.250625000  | 1.795551000  | 6                        | 3.310495000  | -2.543812000 | 1.168750000  |
| 6                      | -1.089365000 | 2.415518000  | 1.345616000  | 6                        | 2.182776000  | -3.329263000 | 0.723470000  |
| 6                      | -1.237562000 | 2.937896000  | -0.038200000 | 6                        | 3.189173000  | -1.729997000 | 2.296416000  |

|                          |              |              |              |                         |              |              |              |
|--------------------------|--------------|--------------|--------------|-------------------------|--------------|--------------|--------------|
| 6                        | 0.101941000  | 3.279533000  | -0.665706000 | 6                       | 0.976232000  | -3.277540000 | 1.422046000  |
| 6                        | 0.186007000  | 2.696590000  | -1.968797000 | 6                       | -0.274391000 | -3.221289000 | 0.698437000  |
| 6                        | 1.416348000  | 2.347378000  | -2.526834000 | 6                       | 2.182650000  | -3.329382000 | -0.723078000 |
| 6                        | 1.549990000  | 1.110888000  | -3.278743000 | 6                       | 0.975992000  | -3.277785000 | -1.421460000 |
| 6                        | 0.450950000  | 0.279866000  | -3.469982000 | 6                       | -0.274506000 | -3.221397000 | -0.697640000 |
| 6                        | 0.599087000  | -1.150137000 | -3.354374000 | 6                       | 4.450052000  | 0.061697000  | 1.169367000  |
| 6                        | 1.845229000  | -1.702065000 | -3.051092000 | 6                       | 4.569104000  | -0.780415000 | -0.000231000 |
| 6                        | 1.943054000  | -2.790179000 | -2.105543000 | 6                       | 3.771746000  | -0.402905000 | 2.297439000  |
| 6                        | 0.791735000  | -3.295740000 | -1.496991000 | 6                       | 4.009419000  | -2.058313000 | -0.000073000 |
| 6                        | 0.800486000  | -3.617970000 | -0.087399000 | 6                       | 3.310293000  | -2.544004000 | -1.168691000 |
| 6                        | 1.959441000  | -3.427178000 | 0.659065000  | 6                       | 4.449849000  | 0.061500000  | -1.169951000 |
| 6                        | 1.883228000  | -2.868004000 | 1.996094000  | 6                       | 3.771350000  | -0.403292000 | -2.297829000 |
| 6                        | 0.651365000  | -2.515948000 | 2.539705000  | 6                       | 3.188777000  | -1.730380000 | -2.296474000 |
| 6                        | 0.521236000  | -1.291754000 | 3.293871000  | 6                       | -0.477968000 | -1.862882000 | -2.592212000 |
| 6                        | 1.628100000  | -0.462652000 | 3.479331000  | 6                       | 0.851371000  | -2.433259000 | -2.588975000 |
| 6                        | 1.484375000  | 0.970690000  | 3.359980000  | 6                       | 1.940824000  | -1.674296000 | -3.015763000 |
| 6                        | 0.238855000  | 1.518395000  | 3.054339000  | 6                       | -0.669537000 | -0.529736000 | -3.020452000 |
| 6                        | 0.130362000  | 2.595255000  | 2.097995000  | 6                       | -2.169550000 | -0.112408000 | -1.155718000 |
| 6                        | 1.276478000  | 3.114484000  | 1.508111000  | 6                       | -1.996916000 | -1.474504000 | -0.721158000 |
| 6                        | 1.254907000  | 3.435430000  | 0.081246000  | 6                       | -1.165774000 | -2.351524000 | -1.439320000 |
| 6                        | 2.534761000  | 3.066743000  | -0.470728000 | 6                       | -1.555677000 | 0.342568000  | -2.329051000 |
| 6                        | 2.617524000  | 2.535462000  | -1.763513000 | 6                       | -1.088387000 | 2.490694000  | -1.177950000 |
| 6                        | 3.501301000  | 1.426220000  | -2.032254000 | 6                       | -1.998728000 | 2.169996000  | 0.000092000  |
| 6                        | 2.841642000  | 0.545537000  | -2.974435000 | 6                       | -2.416390000 | 0.726050000  | 0.000289000  |
| 6                        | 2.987725000  | -0.838348000 | -2.859195000 | 6                       | -0.960136000 | 1.675985000  | -2.288609000 |
| 6                        | 3.794537000  | -1.392976000 | -1.796035000 | 6                       | 1.379813000  | 2.371991000  | -2.588418000 |
| 6                        | 3.147239000  | -2.598434000 | -1.332111000 | 6                       | 1.257252000  | 3.203650000  | -1.421026000 |
| 6                        | 3.152501000  | -2.909605000 | 0.030151000  | 6                       | 0.046757000  | 3.239434000  | -0.723068000 |
| 6                        | 3.814988000  | -2.036888000 | 0.971466000  | 6                       | 0.284645000  | 1.614947000  | -3.011334000 |
| 6                        | 3.031730000  | -2.012723000 | 2.187369000  | 6                       | 1.746038000  | -0.306059000 | -3.458258000 |
| 6                        | 2.906001000  | -0.828575000 | 2.914957000  | 6                       | 2.880927000  | 0.473644000  | -3.015696000 |
| 6                        | 3.552538000  | 0.379700000  | 2.448561000  | 6                       | 2.700588000  | 1.792704000  | -2.589652000 |
| 6                        | 2.672374000  | 1.489253000  | 2.726662000  | 6                       | 0.472950000  | 0.254938000  | -3.458125000 |
| 6                        | 2.560559000  | 2.540985000  | 1.808710000  | 26                      | -4.017803000 | -0.543881000 | -0.000003000 |
| 6                        | 3.340295000  | 2.513537000  | 0.588049000  | 17                      | -5.027200000 | -2.561767000 | -0.000941000 |
| 6                        | 4.199281000  | 1.443579000  | 0.328640000  | 8                       | -5.676543000 | 0.615754000  | -2.075833000 |
| 6                        | 4.276197000  | 0.888123000  | -1.004734000 | 8                       | -5.676818000 | 0.613527000  | 2.076907000  |
| 6                        | 4.426835000  | -0.544578000 | -0.885211000 | 6                       | -5.025861000 | 0.145653000  | -1.247548000 |
| 6                        | 4.438673000  | -0.872763000 | 0.522856000  | 6                       | -5.026071000 | 0.144309000  | 1.248178000  |
| 6                        | 4.306973000  | 0.356713000  | 1.274077000  | 17                      | -3.473670000 | 3.311547000  | 0.000055000  |
| 17                       | -2.380038000 | 4.444381000  | -0.085771000 |                         |              |              |              |
| $(Cl^-C_{60})Fe(CO)_2Br$ |              |              |              | $(Cl^-C_{60})CoCONMe_3$ |              |              |              |
| 6                        | 3.085583000  | 1.583859000  | 2.589560000  | 27                      | -3.785588000 | -0.803498000 | -0.099644000 |
| 6                        | 3.834492000  | 1.987227000  | 1.419968000  | 7                       | -5.417358000 | 0.160755000  | 0.574673000  |
| 6                        | 3.124913000  | 0.253068000  | 3.015832000  | 8                       | -5.195702000 | -3.040150000 | -1.247043000 |
| 6                        | 4.597878000  | 1.049528000  | 0.723185000  | 6                       | -4.644970000 | -2.167738000 | -0.706031000 |
| 6                        | 4.597789000  | 1.049443000  | -0.723906000 | 6                       | -6.068834000 | 0.811625000  | -0.583267000 |
| 6                        | 3.040406000  | 2.953657000  | 0.695428000  | 1                       | -5.369002000 | 1.511793000  | -1.043136000 |
| 6                        | 3.040322000  | 2.953575000  | -0.696184000 | 1                       | -6.357341000 | 0.051599000  | -1.311861000 |
| 6                        | 3.834318000  | 1.987058000  | -1.420706000 | 6                       | -6.377314000 | -0.768228000 | 1.209499000  |
| 6                        | 0.707123000  | 0.291862000  | 3.458582000  | 1                       | -5.889893000 | -1.290238000 | 2.035100000  |
| 6                        | 0.664436000  | 1.663896000  | 3.011452000  | 1                       | -7.241163000 | -0.209825000 | 1.595600000  |
| 6                        | 1.913537000  | -0.401618000 | 3.458501000  | 6                       | -5.069042000 | 1.191615000  | 1.578744000  |
| 6                        | 1.833772000  | 2.300159000  | 2.588245000  | 1                       | -5.983062000 | 1.685839000  | 1.935107000  |
| 6                        | 1.800200000  | 3.139913000  | 1.420472000  | 1                       | -4.413446000 | 1.939151000  | 1.131427000  |
| 6                        | -0.567245000 | 1.856687000  | 2.289111000  | 1                       | -4.562061000 | 0.720910000  | 2.423446000  |
| 6                        | -0.608434000 | 2.680402000  | 1.178106000  | 1                       | -6.966056000 | 1.357445000  | -0.257374000 |
| 6                        | 0.600170000  | 3.303148000  | 0.722632000  | 1                       | -6.725453000 | -1.503406000 | 0.483234000  |
| 6                        | 0.797483000  | -2.421616000 | 2.589788000  | 6                       | 3.434655000  | 2.503105000  | 1.053967000  |
| 6                        | -0.463976000 | -1.713560000 | 2.593727000  | 6                       | 2.557410000  | 3.232216000  | 0.165823000  |
| 6                        | 1.961637000  | -1.782920000 | 3.016366000  | 6                       | 4.313397000  | 1.548906000  | 0.537637000  |
| 6                        | -0.512793000 | -0.367000000 | 3.021587000  | 6                       | 2.592420000  | 2.987808000  | -1.204778000 |



|                          |              |              |              |                          |              |              |              |
|--------------------------|--------------|--------------|--------------|--------------------------|--------------|--------------|--------------|
| 6                        | -1.301654000 | 0.594728000  | 2.331303000  | 6                        | 1.356426000  | 2.903057000  | -1.954827000 |
| 6                        | -1.199588000 | -2.126574000 | 1.440931000  | 6                        | 1.288073000  | 3.404349000  | 0.841817000  |
| 6                        | -1.932905000 | -1.166400000 | 0.721906000  | 6                        | 0.094414000  | 3.303042000  | 0.122958000  |
| 6                        | -1.957036000 | 0.206990000  | 1.155629000  | 6                        | 0.130382000  | 3.052168000  | -1.300383000 |
| 6                        | 3.230093000  | -2.792855000 | 1.168738000  | 6                        | 3.795246000  | 0.028532000  | 2.401304000  |
| 6                        | 2.025425000  | -3.453744000 | 0.723378000  | 6                        | 2.884970000  | 1.011841000  | 2.932687000  |
| 6                        | 3.196393000  | -1.971145000 | 2.296642000  | 6                        | 4.495567000  | 0.289931000  | 1.222555000  |
| 6                        | 0.831231000  | -3.274788000 | 1.422055000  | 6                        | 2.709176000  | 2.232277000  | 2.274787000  |
| 6                        | -0.406090000 | -3.085568000 | 0.698462000  | 6                        | 1.384777000  | 2.789698000  | 2.139521000  |
| 6                        | 2.025337000  | -3.453829000 | -0.723251000 | 6                        | 1.745105000  | 0.313422000  | 3.486766000  |
| 6                        | 0.831059000  | -3.274955000 | -1.421804000 | 6                        | 0.466827000  | 0.854931000  | 3.353278000  |
| 6                        | -0.406175000 | -3.085650000 | -0.698084000 | 6                        | 0.283119000  | 2.111467000  | 2.665796000  |
| 6                        | 4.640330000  | -0.323853000 | 1.169378000  | 6                        | 4.085326000  | -2.006040000 | 0.439346000  |
| 6                        | 4.669146000  | -1.173988000 | -0.000234000 | 6                        | 3.364174000  | -2.281654000 | 1.662168000  |
| 6                        | 3.917045000  | -0.713733000 | 2.297818000  | 6                        | 4.643211000  | -0.745857000 | 0.223684000  |
| 6                        | 3.976667000  | -2.384710000 | -0.000119000 | 6                        | 3.215505000  | -1.281623000 | 2.624589000  |
| 6                        | 3.229950000  | -2.792994000 | -1.168836000 | 6                        | 1.954794000  | -1.106320000 | 3.302346000  |
| 6                        | 4.640187000  | -0.323992000 | -1.169942000 | 6                        | 2.246513000  | -3.136626000 | 1.337139000  |
| 6                        | 3.916766000  | -0.714005000 | -2.298248000 | 6                        | 1.025063000  | -2.967228000 | 1.988353000  |
| 6                        | 3.196114000  | -1.971418000 | -2.296835000 | 6                        | 0.872697000  | -1.932580000 | 2.988554000  |
| 6                        | -0.464290000 | -1.713868000 | -2.593507000 | 6                        | 3.896389000  | -0.787750000 | -2.121830000 |
| 6                        | 0.797169000  | -2.421924000 | -2.589637000 | 6                        | 3.316697000  | -2.096378000 | -1.897651000 |
| 6                        | 1.961271000  | -1.783277000 | -3.016431000 | 6                        | 4.546842000  | -0.125895000 | -1.079097000 |
| 6                        | -0.513159000 | -0.367360000 | -3.021522000 | 6                        | 3.413647000  | -2.696023000 | -0.639637000 |
| 6                        | -1.957178000 | 0.206849000  | -1.155459000 | 6                        | 2.278238000  | -3.395320000 | -0.087148000 |
| 6                        | -1.932982000 | -1.166482000 | -0.721571000 | 6                        | 2.084300000  | -2.176151000 | -2.640432000 |
| 6                        | -1.199765000 | -2.126745000 | -1.440572000 | 6                        | 0.986865000  | -2.851245000 | -2.109211000 |
| 6                        | -1.301936000 | 0.594448000  | -2.331249000 | 6                        | 1.086724000  | -3.474412000 | -0.808659000 |
| 6                        | -0.608577000 | 2.680262000  | -1.178386000 | 6                        | 3.502620000  | 2.002226000  | -1.742042000 |
| 6                        | -1.547705000 | 2.457512000  | -0.000069000 | 6                        | 2.829972000  | 1.316729000  | -2.824726000 |
| 6                        | -2.109753000 | 1.065246000  | 0.000045000  | 6                        | 4.345608000  | 1.292449000  | -0.885735000 |
| 6                        | -0.567525000 | 1.856416000  | -2.289299000 | 6                        | 3.021466000  | -0.055577000 | -3.004821000 |
| 6                        | 1.833456000  | 2.299851000  | -2.588776000 | 6                        | 1.896966000  | -0.907950000 | -3.323581000 |
| 6                        | 1.800026000  | 3.139745000  | -1.421100000 | 6                        | 1.507382000  | 1.878123000  | -2.954408000 |
| 6                        | 0.600081000  | 3.303063000  | -0.723134000 | 6                        | 0.424137000  | 1.051325000  | -3.261696000 |
| 6                        | 0.664068000  | 1.663539000  | -3.011766000 | 6                        | 0.623663000  | -0.364088000 | -3.449467000 |
| 6                        | 1.913117000  | -0.402028000 | -3.458725000 | 6                        | -1.060644000 | -2.589190000 | -1.039444000 |
| 6                        | 3.124547000  | 0.252711000  | -3.016280000 | 6                        | -0.347109000 | -2.302964000 | -2.241384000 |
| 6                        | 3.085267000  | 1.583552000  | -2.590159000 | 6                        | -0.530593000 | -1.063518000 | -2.900941000 |
| 6                        | 0.706703000  | 0.291451000  | -3.458741000 | 6                        | -1.929309000 | -1.604098000 | -0.503766000 |
| 26                       | -3.831310000 | -0.042869000 | 0.000327000  | 6                        | -1.117910000 | -2.072441000 | 1.797581000  |
| 35                       | -5.137734000 | -2.010515000 | 0.000351000  | 6                        | -0.209707000 | -3.046966000 | 1.238496000  |
| 8                        | -5.381044000 | 1.255850000  | -2.077934000 | 6                        | -0.182655000 | -3.302115000 | -0.138200000 |
| 8                        | -5.380568000 | 1.255647000  | 2.079052000  | 6                        | -1.939508000 | -1.345091000 | 0.922394000  |
| 6                        | -4.773512000 | 0.732839000  | -1.248118000 | 6                        | -1.549815000 | 0.733696000  | 2.189667000  |
| 6                        | -4.773253000 | 0.732702000  | 1.249033000  | 6                        | -0.662039000 | -0.000423000 | 3.041778000  |
| 17                       | -2.900719000 | 3.741993000  | -0.000059000 | 6                        | -0.457332000 | -1.382795000 | 2.869595000  |
|                          |              |              |              | 6                        | -2.122221000 | 0.073176000  | 1.098624000  |
|                          |              |              |              | 6                        | -1.906008000 | 2.095897000  | -0.441639000 |
|                          |              |              |              | 6                        | -1.053434000 | 2.642697000  | 0.676640000  |
|                          |              |              |              | 6                        | -0.950033000 | 2.034178000  | 1.919888000  |
|                          |              |              |              | 6                        | -2.341864000 | 0.691694000  | -0.194367000 |
|                          |              |              |              | 6                        | -1.434837000 | -0.089165000 | -2.402285000 |
|                          |              |              |              | 6                        | -0.837942000 | 1.229440000  | -2.587573000 |
|                          |              |              |              | 6                        | -0.988021000 | 2.222718000  | -1.639559000 |
|                          |              |              |              | 6                        | -2.108664000 | -0.331834000 | -1.191049000 |
|                          |              |              |              | 17                       | -3.391779000 | 3.314867000  | -0.766917000 |
| $(Cl^- C_{60})CoCOPeT_3$ |              |              |              | $(Cl^- C_{60})NiNEt_3Cl$ |              |              |              |
| 27                       | -3.354801000 | -0.717297000 | -0.546241000 | 6                        | 3.394881000  | -1.972276000 | -2.317699000 |
| 8                        | -4.930255000 | -2.761353000 | -1.814775000 | 6                        | 2.254350000  | -1.599023000 | -3.114022000 |
| 6                        | -4.287939000 | -1.953020000 | -1.272307000 | 6                        | 3.257804000  | -2.894972000 | -1.278334000 |
| 6                        | 3.753844000  | 2.358814000  | 1.466954000  | 6                        | 0.999259000  | -2.153774000 | -2.842538000 |

|    |              |              |              |    |              |              |              |
|----|--------------|--------------|--------------|----|--------------|--------------|--------------|
| 6  | 2.972535000  | 3.171817000  | 0.562269000  | 6  | -0.184727000 | -1.333312000 | -2.883953000 |
| 6  | 4.668833000  | 1.434224000  | 0.959761000  | 6  | 2.367993000  | -0.188166000 | -3.416150000 |
| 6  | 3.137720000  | 3.039153000  | -0.813691000 | 6  | 1.229393000  | 0.615547000  | -3.434256000 |
| 6  | 1.978405000  | 3.036462000  | -1.682519000 | 6  | -0.073983000 | 0.041159000  | -3.166508000 |
| 6  | 1.645044000  | 3.310675000  | 1.126363000  | 6  | 4.726966000  | -1.536259000 | 0.156447000  |
| 6  | 0.525169000  | 3.289422000  | 0.291426000  | 6  | 4.878284000  | -0.583698000 | -0.921230000 |
| 6  | 0.697026000  | 3.153184000  | -1.137152000 | 6  | 3.930903000  | -2.668359000 | -0.019145000 |
| 6  | 3.959106000  | -0.223058000 | 2.633984000  | 6  | 4.223339000  | -0.795263000 | -2.135600000 |
| 6  | 3.010818000  | 0.729542000  | 3.154942000  | 6  | 3.589008000  | 0.305151000  | -2.815502000 |
| 6  | 4.772686000  | 0.121056000  | 1.552972000  | 6  | 4.920543000  | 0.740717000  | -0.345490000 |
| 6  | 2.911264000  | 2.002548000  | 2.586445000  | 6  | 4.306681000  | 1.807542000  | -1.003608000 |
| 6  | 1.611530000  | 2.591942000  | 2.372398000  | 6  | 3.630943000  | 1.587953000  | -2.262760000 |
| 6  | 1.815973000  | 0.008809000  | 3.537935000  | 6  | 2.995580000  | -2.391937000 | 2.241492000  |
| 6  | 0.562670000  | 0.581678000  | 3.328230000  | 6  | 3.824323000  | -1.216640000 | 2.424060000  |
| 6  | 0.458624000  | 1.891764000  | 2.732780000  | 6  | 3.051769000  | -3.106585000 | 1.041981000  |
| 6  | 4.417974000  | -2.095969000 | 0.548243000  | 6  | 4.673892000  | -0.798203000 | 1.399110000  |
| 6  | 3.580004000  | -2.457491000 | 1.669895000  | 6  | 4.795263000  | 0.608486000  | 1.089758000  |
| 6  | 5.006617000  | -0.832393000 | 0.490730000  | 6  | 3.067657000  | -0.245466000 | 3.174588000  |
| 6  | 3.348699000  | -1.536706000 | 2.692997000  | 6  | 3.186455000  | 1.115746000  | 2.881761000  |
| 6  | 2.029379000  | -1.395788000 | 3.259032000  | 6  | 4.063848000  | 1.548953000  | 1.815827000  |
| 6  | 2.490657000  | -3.265125000 | 1.171177000  | 6  | 0.606419000  | -3.371212000 | 1.059622000  |
| 6  | 1.214228000  | -3.127946000 | 1.714912000  | 6  | 0.549673000  | -2.629050000 | 2.300175000  |
| 6  | 0.975546000  | -2.174686000 | 2.776626000  | 6  | 1.836901000  | -3.601764000 | 0.441427000  |
| 6  | 4.487849000  | -0.671359000 | -1.910646000 | 6  | 1.727069000  | -2.149268000 | 2.877094000  |
| 6  | 3.876658000  | -1.983174000 | -1.850330000 | 6  | 1.767774000  | -0.816180000 | 3.452826000  |
| 6  | 5.041668000  | -0.107484000 | -0.759862000 | 6  | -0.637312000 | -1.804884000 | 2.276488000  |
| 6  | 3.846047000  | -2.683995000 | -0.642661000 | 6  | -0.598700000 | -0.505823000 | 2.834239000  |
| 6  | 2.656355000  | -3.407184000 | -0.259968000 | 6  | 0.633850000  | -0.011811000 | 3.428123000  |
| 6  | 2.719990000  | -1.981289000 | -2.711117000 | 6  | 0.854948000  | -3.107802000 | -1.761868000 |
| 6  | 1.570822000  | -2.678469000 | -2.343814000 | 6  | -0.417829000 | -2.867770000 | -1.121501000 |
| 6  | 1.539409000  | -3.406471000 | -1.095870000 | 6  | 1.963483000  | -3.468440000 | -0.994372000 |
| 6  | 4.085806000  | 2.084769000  | -1.341654000 | 6  | -0.543595000 | -3.001168000 | 0.266978000  |
| 6  | 3.513212000  | 1.501190000  | -2.535828000 | 6  | -1.307187000 | -2.040150000 | 1.032513000  |
| 6  | 4.836106000  | 1.293568000  | -0.470454000 | 6  | -1.051012000 | -1.771447000 | -1.821913000 |
| 6  | 3.708228000  | 0.144576000  | -2.809116000 | 6  | -1.745564000 | -0.812868000 | -1.078017000 |
| 6  | 2.611307000  | -0.659178000 | -3.302427000 | 6  | -1.887560000 | -0.943707000 | 0.355179000  |
| 6  | 2.215165000  | 2.094200000  | -2.744628000 | 6  | -0.385277000 | 1.774208000  | 2.328324000  |
| 6  | 1.158273000  | 1.314230000  | -3.220661000 | 6  | -1.222782000 | 0.588586000  | 2.175543000  |
| 6  | 1.361158000  | -0.084694000 | -3.503622000 | 6  | -1.834414000 | 0.382852000  | 0.933747000  |
| 6  | -0.567903000 | -2.466515000 | -1.455311000 | 6  | -0.256185000 | 2.686898000  | 1.299946000  |
| 6  | 0.260980000  | -2.096312000 | -2.554690000 | 6  | 2.150102000  | 2.888777000  | 1.773333000  |
| 6  | 0.152768000  | -0.805483000 | -3.126496000 | 6  | 2.009207000  | 1.949085000  | 2.854062000  |
| 6  | -1.472711000 | -1.513153000 | -0.925437000 | 6  | 0.754710000  | 1.395149000  | 3.121132000  |
| 6  | -0.893367000 | -2.182865000 | 1.395477000  | 6  | 1.032136000  | 3.229973000  | 1.002681000  |
| 6  | 0.056051000  | -3.124366000 | 0.846716000  | 6  | 2.393029000  | 3.149523000  | -1.048308000 |
| 6  | 0.213075000  | -3.266042000 | -0.536306000 | 6  | 3.541331000  | 2.776501000  | -0.250697000 |
| 6  | -1.629176000 | -1.377125000 | 0.508748000  | 6  | 3.424793000  | 2.650792000  | 1.131861000  |
| 6  | -1.335333000 | 0.588762000  | 1.975644000  | 6  | 1.153215000  | 3.359881000  | -0.433297000 |
| 6  | -0.541311000 | -0.225466000 | 2.840728000  | 6  | 0.001434000  | 2.188493000  | -2.219130000 |
| 6  | -0.333025000 | -1.594989000 | 2.575972000  | 6  | 1.269412000  | 1.940553000  | -2.855834000 |
| 6  | -1.819980000 | 0.030317000  | 0.783199000  | 6  | 2.451610000  | 2.419813000  | -2.285311000 |
| 6  | -1.432555000 | 2.174145000  | -0.563290000 | 6  | -0.062247000 | 2.910057000  | -1.039558000 |
| 6  | -0.679811000 | 2.607903000  | 0.676527000  | 6  | -1.806535000 | 1.342608000  | -0.152200000 |
| 6  | -0.697545000 | 1.894985000  | 1.867938000  | 6  | -1.619177000 | 0.586527000  | -1.376994000 |
| 6  | -1.892996000 | 0.757168000  | -0.469786000 | 6  | -0.835664000 | 1.012273000  | -2.440431000 |
| 6  | -0.784893000 | 0.140457000  | -2.634854000 | 6  | -1.119122000 | 2.675545000  | 0.036617000  |
| 6  | -0.161195000 | 1.459937000  | -2.658648000 | 28 | -3.535209000 | 0.334379000  | -0.179996000 |
| 6  | -0.390034000 | 2.371614000  | -1.647900000 | 17 | -4.771829000 | 1.917787000  | -0.990892000 |
| 6  | -1.570239000 | -0.186394000 | -1.514456000 | 7  | -5.001166000 | -1.036118000 | 0.225728000  |
| 15 | -5.135542000 | 0.031780000  | 0.447802000  | 6  | -6.379481000 | -0.539581000 | -0.081824000 |
| 6  | -5.372193000 | 1.820212000  | 0.799565000  | 1  | -6.502413000 | 0.403437000  | 0.452105000  |
| 1  | -5.227304000 | 2.355562000  | -0.143492000 | 1  | -6.387364000 | -0.261319000 | -1.136615000 |
| 1  | -6.426963000 | 1.941184000  | 1.083917000  | 6  | -7.507884000 | -1.499316000 | 0.240090000  |
| 6  | -4.459400000 | 2.389478000  | 1.870198000  | 1  | -7.455540000 | -2.429160000 | -0.334074000 |

|                                                         |              |              |              |                                                      |              |              |              |
|---------------------------------------------------------|--------------|--------------|--------------|------------------------------------------------------|--------------|--------------|--------------|
| 1                                                       | -3.406127000 | 2.259429000  | 1.612379000  | 1                                                    | -8.455939000 | -1.019848000 | -0.014404000 |
| 1                                                       | -4.627763000 | 1.924351000  | 2.846156000  | 1                                                    | -7.556613000 | -1.760867000 | 1.301420000  |
| 1                                                       | -4.626349000 | 3.463684000  | 1.980192000  | 6                                                    | -4.864739000 | -1.328896000 | 1.684401000  |
| 6                                                       | -6.731329000 | -0.392240000 | -0.357551000 | 1                                                    | -5.535679000 | -2.160461000 | 1.944484000  |
| 1                                                       | -6.787167000 | -1.481827000 | -0.445494000 | 1                                                    | -3.846525000 | -1.701076000 | 1.834114000  |
| 1                                                       | -7.537986000 | -0.085343000 | 0.320814000  | 6                                                    | -5.130647000 | -0.132806000 | 2.571685000  |
| 6                                                       | -6.887213000 | 0.257822000  | -1.723451000 | 1                                                    | -4.580202000 | 0.749330000  | 2.225561000  |
| 1                                                       | -6.084093000 | -0.047249000 | -2.401548000 | 1                                                    | -4.802370000 | -0.349497000 | 3.590838000  |
| 1                                                       | -6.864918000 | 1.349679000  | -1.659402000 | 1                                                    | -6.190618000 | 0.130228000  | 2.613910000  |
| 1                                                       | -7.835873000 | -0.026031000 | -2.185193000 | 6                                                    | -4.721296000 | -2.293790000 | -0.527889000 |
| 6                                                       | -5.277639000 | -0.742982000 | 2.112866000  | 1                                                    | -3.714796000 | -2.614463000 | -0.242516000 |
| 1                                                       | -4.409585000 | -0.402492000 | 2.690626000  | 1                                                    | -5.403811000 | -3.079302000 | -0.172443000 |
| 1                                                       | -6.168616000 | -0.324396000 | 2.601204000  | 6                                                    | -4.828440000 | -2.132541000 | -2.027693000 |
| 6                                                       | -5.325596000 | -2.262160000 | 2.083426000  | 1                                                    | -5.864378000 | -2.037665000 | -2.363354000 |
| 1                                                       | -4.404894000 | -2.676889000 | 1.661196000  | 1                                                    | -4.396778000 | -3.003628000 | -2.525920000 |
| 1                                                       | -6.160511000 | -2.636889000 | 1.482916000  | 1                                                    | -4.281364000 | -1.247801000 | -2.372482000 |
| 1                                                       | -5.440840000 | -2.666827000 | 3.091934000  | 17                                                   | -2.277867000 | 4.110534000  | 0.125144000  |
| 17                                                      | -2.847503000 | 3.407415000  | -0.960586000 |                                                      |              |              |              |
| (Cl <sup>-</sup> C <sub>60</sub> )NiPMe <sub>3</sub> Cl |              |              |              | (Cl <sup>-</sup> C <sub>60</sub> )CuNMe <sub>3</sub> |              |              |              |
| 6                                                       | 3.334595000  | 2.730047000  | 0.696695000  | 29                                                   | 4.054865000  | -0.412083000 | -0.614777000 |
| 6                                                       | 2.121390000  | 3.043420000  | 1.421938000  | 7                                                    | 5.781875000  | -0.790868000 | 0.195084000  |
| 6                                                       | 3.334708000  | 2.730152000  | -0.695948000 | 6                                                    | 5.761103000  | -2.160168000 | 0.748777000  |
| 6                                                       | 0.942224000  | 3.328084000  | 0.723611000  | 1                                                    | 4.903964000  | -2.264223000 | 1.418198000  |
| 6                                                       | -0.322053000 | 2.835903000  | 1.179645000  | 1                                                    | 5.661411000  | -2.883774000 | -0.062727000 |
| 6                                                       | 2.069221000  | 2.205725000  | 2.589982000  | 6                                                    | 6.922309000  | -0.646203000 | -0.727972000 |
| 6                                                       | 0.839854000  | 1.694280000  | 3.012623000  | 1                                                    | 6.940381000  | 0.366761000  | -1.133769000 |
| 6                                                       | -0.365018000 | 2.015829000  | 2.292318000  | 1                                                    | 7.870885000  | -0.839505000 | -0.206143000 |
| 6                                                       | 4.685802000  | 0.673821000  | -0.723024000 | 6                                                    | 5.919042000  | 0.175222000  | 1.307440000  |
| 6                                                       | 4.685690000  | 0.673713000  | 0.723674000  | 1                                                    | 6.846436000  | -0.007631000 | 1.868510000  |
| 6                                                       | 4.024454000  | 1.685798000  | -1.420415000 | 1                                                    | 5.062812000  | 0.074033000  | 1.978552000  |
| 6                                                       | 4.024229000  | 1.685586000  | 1.421113000  | 1                                                    | 5.933231000  | 1.193095000  | 0.912778000  |
| 6                                                       | 3.240852000  | 1.362827000  | 2.592756000  | 1                                                    | 6.685863000  | -2.369331000 | 1.305401000  |
| 6                                                       | 4.584033000  | -0.697072000 | 1.169641000  | 1                                                    | 6.820063000  | -1.354028000 | -1.552514000 |
| 6                                                       | 3.824870000  | -1.008795000 | 2.298301000  | 6                                                    | -3.352354000 | 1.315539000  | 2.267792000  |
| 6                                                       | 3.141224000  | 0.035612000  | 3.018468000  | 6                                                    | -2.620988000 | 0.407812000  | 3.126932000  |
| 6                                                       | 3.141700000  | 0.036064000  | -3.018159000 | 6                                                    | -4.192845000 | 0.807043000  | 1.276461000  |
| 6                                                       | 3.825232000  | -1.008451000 | -2.298042000 | 6                                                    | -2.763801000 | -0.972068000 | 2.968763000  |
| 6                                                       | 3.241261000  | 1.363214000  | -2.592229000 | 6                                                    | -1.603051000 | -1.830943000 | 3.046697000  |
| 6                                                       | 4.584215000  | -0.696897000 | -1.169213000 | 6                                                    | -1.315388000 | 0.976395000  | 3.365781000  |
| 6                                                       | 4.523294000  | -1.545933000 | 0.000146000  | 6                                                    | -0.197782000 | 0.148838000  | 3.443787000  |
| 6                                                       | 2.976201000  | -2.184671000 | -2.297508000 | 6                                                    | -0.342671000 | -1.279222000 | 3.282911000  |
| 6                                                       | 2.924401000  | -3.007236000 | -1.169546000 | 6                                                    | -3.380318000 | 2.497860000  | -0.316526000 |
| 6                                                       | 3.708554000  | -2.678006000 | -0.000020000 | 6                                                    | -2.506624000 | 3.019255000  | 0.704654000  |
| 6                                                       | 0.840327000  | 1.694724000  | -3.012418000 | 6                                                    | -4.212915000 | 1.412284000  | -0.038219000 |
| 6                                                       | 0.740245000  | 0.323206000  | -3.456854000 | 6                                                    | -2.496618000 | 2.441949000  | 1.978439000  |
| 6                                                       | 2.069628000  | 2.206106000  | -2.589506000 | 6                                                    | -1.242470000 | 2.235506000  | 2.650103000  |
| 6                                                       | 1.868246000  | -0.490966000 | -3.460549000 | 6                                                    | -1.270714000 | 3.418479000  | 0.074889000  |
| 6                                                       | 1.770760000  | -1.868914000 | -3.017897000 | 6                                                    | -0.065181000 | 3.243044000  | 0.730694000  |
| 6                                                       | -0.541241000 | -0.206256000 | -3.021144000 | 6                                                    | -0.055048000 | 2.613775000  | 2.018517000  |
| 6                                                       | -0.638163000 | -1.550837000 | -2.599055000 | 6                                                    | -3.709480000 | 0.433592000  | -2.235520000 |
| 6                                                       | 0.543576000  | -2.380851000 | -2.589954000 | 6                                                    | -2.860045000 | 1.561358000  | -2.536295000 |
| 6                                                       | 0.942341000  | 3.328184000  | -0.723137000 | 6                                                    | -4.382177000 | 0.360418000  | -1.014398000 |
| 6                                                       | -0.321851000 | 2.836050000  | -1.179437000 | 6                                                    | -2.687383000 | 2.578893000  | -1.587051000 |
| 6                                                       | 2.121613000  | 3.043621000  | -1.421328000 | 6                                                    | -1.392920000 | 3.157454000  | -1.357077000 |
| 6                                                       | -0.364652000 | 2.016159000  | -2.292251000 | 6                                                    | -1.715456000 | 1.076034000  | -3.264783000 |
| 6                                                       | -1.222429000 | 0.835130000  | -2.328836000 | 6                                                    | -0.453332000 | 1.622246000  | -3.026442000 |
| 6                                                       | -1.283967000 | 2.710068000  | 0.000015000  | 6                                                    | -0.282402000 | 2.667533000  | -2.040084000 |
| 6                                                       | -1.966601000 | 1.367419000  | -0.000135000 | 6                                                    | -3.855618000 | -2.038984000 | -0.835522000 |
| 6                                                       | -1.916891000 | 0.518553000  | -1.161931000 | 6                                                    | -3.160756000 | -1.963737000 | -2.102584000 |
| 6                                                       | -0.727030000 | -2.921011000 | -0.701683000 | 6                                                    | -4.451570000 | -0.896686000 | -0.301005000 |
| 6                                                       | -1.418881000 | -1.891174000 | -1.446438000 | 6                                                    | -3.091312000 | -0.752626000 | -2.790625000 |
| 6                                                       | -2.052313000 | -0.853264000 | -0.728961000 | 6                                                    | -1.856711000 | -0.354144000 | -3.426845000 |

|                                                      |              |              |              |                                        |              |              |              |
|------------------------------------------------------|--------------|--------------|--------------|----------------------------------------|--------------|--------------|--------------|
| 6                                                    | -0.727140000 | -2.921124000 | 0.700939000  | 6                                      | -1.997622000 | -2.818469000 | -2.024078000 |
| 6                                                    | 1.657826000  | -3.536437000 | 0.723711000  | 6                                      | -0.806538000 | -2.433113000 | -2.636891000 |
| 6                                                    | 1.657938000  | -3.536327000 | -0.724165000 | 6                                      | -0.734744000 | -1.180262000 | -3.350559000 |
| 6                                                    | 0.488008000  | -3.232088000 | -1.421663000 | 6                                      | -3.638542000 | -1.495490000 | 1.944538000  |
| 6                                                    | 0.487789000  | -3.232303000 | 1.421068000  | 6                                      | -3.020576000 | -2.678692000 | 1.392153000  |
| 6                                                    | 1.770288000  | -1.869368000 | 3.017712000  | 6                                      | -4.343690000 | -0.620400000 | 1.114419000  |
| 6                                                    | 2.975842000  | -2.185014000 | 2.297459000  | 6                                      | -3.122027000 | -2.940171000 | 0.023358000  |
| 6                                                    | 2.924222000  | -3.007413000 | 1.169371000  | 6                                      | -1.975521000 | -3.426069000 | -0.710064000 |
| 6                                                    | 0.543174000  | -2.381235000 | 2.589493000  | 6                                      | -1.760709000 | -2.884938000 | 2.069475000  |
| 6                                                    | -0.541715000 | -0.206694000 | 3.020837000  | 6                                      | -0.652624000 | -3.356007000 | 1.362004000  |
| 6                                                    | 0.739701000  | 0.322693000  | 3.456834000  | 6                                      | -0.760602000 | -3.627948000 | -0.056132000 |
| 6                                                    | 1.867702000  | -0.491484000 | 3.460579000  | 6                                      | 1.312931000  | -1.526990000 | -2.265260000 |
| 6                                                    | -0.638573000 | -1.551225000 | 2.598535000  | 6                                      | 0.457810000  | -2.636578000 | -1.957076000 |
| 6                                                    | -2.052435000 | -0.853377000 | 0.728317000  | 6                                      | 0.479865000  | -3.237666000 | -0.688767000 |
| 6                                                    | -1.917022000 | 0.518367000  | 1.161525000  | 6                                      | 2.159667000  | -1.003920000 | -1.270572000 |
| 6                                                    | -1.222815000 | 0.834809000  | 2.328609000  | 6                                      | 1.577540000  | 1.326142000  | -1.919942000 |
| 6                                                    | -1.419079000 | -1.891386000 | 1.445722000  | 6                                      | 0.703279000  | 0.770664000  | -2.943112000 |
| 28                                                   | -3.705633000 | 0.199204000  | -0.000218000 | 6                                      | 0.571563000  | -0.607280000 | -3.102208000 |
| 17                                                   | -5.292047000 | 1.690479000  | 0.000124000  | 6                                      | 2.361725000  | 0.441331000  | -1.124612000 |
| 15                                                   | -5.186056000 | -1.386357000 | -0.000033000 | 6                                      | 1.816734000  | 1.846583000  | 0.859033000  |
| 6                                                    | -6.296528000 | -1.311877000 | 1.435879000  | 6                                      | 1.217023000  | 2.923390000  | -0.001550000 |
| 1                                                    | -5.726264000 | -1.441766000 | 2.358243000  | 6                                      | 0.988416000  | 2.483550000  | -1.388104000 |
| 1                                                    | -6.765503000 | -0.325903000 | 1.456609000  | 6                                      | 2.403440000  | 0.708189000  | 0.321551000  |
| 6                                                    | -4.550028000 | -3.092554000 | -0.000367000 | 6                                      | 1.654348000  | -0.632367000 | 2.256631000  |
| 1                                                    | -5.368417000 | -3.818274000 | -0.000462000 | 6                                      | 1.040911000  | 0.544172000  | 2.804500000  |
| 1                                                    | -3.929069000 | -3.259240000 | -0.884387000 | 6                                      | 1.103114000  | 1.748075000  | 2.090846000  |
| 6                                                    | -6.297651000 | -1.311693000 | -1.435058000 | 6                                      | 2.325797000  | -0.556250000 | 1.029852000  |
| 1                                                    | -5.728225000 | -1.442118000 | -2.357863000 | 6                                      | 1.343145000  | -2.708499000 | 0.332945000  |
| 1                                                    | -7.067134000 | -2.087430000 | -1.378097000 | 6                                      | 0.649586000  | -2.780627000 | 1.600554000  |
| 1                                                    | -3.929012000 | -3.259523000 | 0.883563000  | 6                                      | 0.805071000  | -1.762884000 | 2.545154000  |
| 1                                                    | -7.065678000 | -2.088005000 | 1.379770000  | 6                                      | 2.168348000  | -1.611050000 | 0.055144000  |
| 1                                                    | -6.766187000 | -0.325509000 | -1.455647000 | 17                                     | 2.396522000  | 4.489295000  | 0.082655000  |
| 17                                                   | -2.472944000 | 4.129875000  | -0.000070000 |                                        |              |              |              |
| (Cl <sup>-</sup> C <sub>60</sub> )CuPEt <sub>3</sub> |              |              |              | (Cl <sup>-</sup> C <sub>60</sub> )CuCO |              |              |              |
| 29                                                   | 3.494551000  | -0.772831000 | -0.068112000 | 29                                     | -4.217770000 | -0.813159000 | -0.000237000 |
| 15                                                   | 5.619788000  | -0.384859000 | -0.015858000 | 8                                      | -7.068716000 | -1.450877000 | 0.000615000  |
| 6                                                    | -4.187153000 | -0.420245000 | 2.314004000  | 6                                      | -5.942465000 | -1.221716000 | 0.000101000  |
| 6                                                    | -3.637222000 | -1.758393000 | 2.270011000  | 6                                      | 3.745888000  | -1.964771000 | 0.000003000  |
| 6                                                    | -4.860482000 | 0.093040000  | 1.204667000  | 6                                      | 3.063958000  | -2.473094000 | 1.169269000  |
| 6                                                    | -3.785528000 | -2.535677000 | 1.120593000  | 6                                      | 4.266317000  | -0.670137000 | 0.000383000  |
| 6                                                    | -2.677617000 | -3.331206000 | 0.641794000  | 6                                      | 2.915862000  | -1.664708000 | 2.297440000  |
| 6                                                    | -2.380670000 | -1.752350000 | 2.982719000  | 6                                      | 1.666987000  | -1.650755000 | 3.020004000  |
| 6                                                    | -1.312028000 | -2.521452000 | 2.520786000  | 6                                      | 1.960605000  | -3.292550000 | 0.723387000  |
| 6                                                    | -1.465315000 | -3.327203000 | 1.330178000  | 6                                      | 0.754355000  | -3.280937000 | 1.422306000  |
| 6                                                    | -3.751087000 | 2.269316000  | 1.505632000  | 6                                      | 0.601120000  | -2.441718000 | 2.590272000  |
| 6                                                    | -3.051831000 | 1.736950000  | 2.654869000  | 6                                      | 3.456576000  | -0.319214000 | -2.298701000 |
| 6                                                    | -4.639219000 | 1.461400000  | 0.794113000  | 6                                      | 2.916555000  | -1.663630000 | -2.297542000 |
| 6                                                    | -3.266432000 | 0.414894000  | 3.049579000  | 6                                      | 4.117731000  | 0.167118000  | -1.169308000 |
| 6                                                    | -2.149149000 | -0.405763000 | 3.461240000  | 6                                      | 3.064312000  | -2.472548000 | -1.169708000 |
| 6                                                    | -1.715242000 | 2.284089000  | 2.658558000  | 6                                      | 1.960821000  | -3.292210000 | -0.724545000 |
| 6                                                    | -0.637580000 | 1.490587000  | 3.054945000  | 6                                      | 1.667898000  | -1.649339000 | -3.020477000 |
| 6                                                    | -0.860039000 | 0.124170000  | 3.464296000  | 6                                      | 0.601900000  | -2.440508000 | -2.591445000 |
| 6                                                    | -3.776852000 | 2.349122000  | -1.332362000 | 6                                      | 0.754779000  | -3.280264000 | -1.423820000 |
| 6                                                    | -2.857447000 | 3.184989000  | -0.594093000 | 6                                      | 2.997099000  | 2.343664000  | -1.419340000 |
| 6                                                    | -4.652420000 | 1.502109000  | -0.651384000 | 6                                      | 2.311090000  | 1.839582000  | -2.589186000 |
| 6                                                    | -2.844773000 | 3.145566000  | 0.798865000  | 6                                      | 3.883987000  | 1.521303000  | -0.722586000 |
| 6                                                    | -1.584476000 | 3.151988000  | 1.512130000  | 6                                      | 2.536098000  | 0.528396000  | -3.015904000 |
| 6                                                    | -1.610111000 | 3.232039000  | -1.328387000 | 6                                      | 1.427423000  | -0.289031000 | -3.458617000 |
| 6                                                    | -0.396335000 | 3.229725000  | -0.641205000 | 6                                      | 0.971143000  | 2.374502000  | -2.587134000 |
| 6                                                    | -0.383227000 | 3.189122000  | 0.804070000  | 6                                      | -0.098442000 | 1.581527000  | -3.009468000 |
| 6                                                    | -4.228668000 | -0.290674000 | -2.282758000 | 6                                      | 0.135394000  | 0.230478000  | -3.454564000 |
| 6                                                    | -3.321272000 | 0.584942000  | -2.986862000 | 6                                      | 2.996671000  | 2.343000000  | 1.421136000  |

|                                                                                   |              |              |              |                                                                |              |              |              |
|-----------------------------------------------------------------------------------|--------------|--------------|--------------|----------------------------------------------------------------|--------------|--------------|--------------|
| 6                                                                                 | -4.881672000 | 0.158925000  | -1.134379000 | 6                                                              | 2.077104000  | 3.190511000  | 0.696860000  |
| 6                                                                                 | -3.098548000 | 1.882432000  | -2.521891000 | 6                                                              | 3.883767000  | 1.520964000  | 0.724265000  |
| 6                                                                                 | -1.762008000 | 2.429634000  | -2.519093000 | 6                                                              | 2.077316000  | 3.190842000  | -0.694946000 |
| 6                                                                                 | -2.211943000 | -0.210797000 | -3.464264000 | 6                                                              | 0.822425000  | 3.202817000  | -1.419956000 |
| 6                                                                                 | -0.922861000 | 0.319058000  | -3.460760000 | 6                                                              | 0.821995000  | 3.202151000  | 1.421502000  |
| 6                                                                                 | -0.692244000 | 1.660500000  | -2.979528000 | 6                                                              | -0.387742000 | 3.196127000  | 0.723207000  |
| 6                                                                                 | -4.482855000 | -2.002205000 | -0.028279000 | 6                                                              | -0.387519000 | 3.196463000  | -0.722028000 |
| 6                                                                                 | -3.806946000 | -2.470062000 | -1.217955000 | 6                                                              | 3.455884000  | -0.320294000 | 2.299389000  |
| 6                                                                                 | -5.012190000 | -0.711981000 | 0.012815000  | 6                                                              | 2.535188000  | 0.526983000  | 3.016709000  |
| 6                                                                                 | -3.678898000 | -1.628965000 | -2.324188000 | 6                                                              | 4.117376000  | 0.166570000  | 1.170423000  |
| 6                                                                                 | -2.435374000 | -1.582178000 | -3.058013000 | 6                                                              | 2.310318000  | 1.838375000  | 2.590546000  |
| 6                                                                                 | -2.690794000 | -3.290529000 | -0.805123000 | 6                                                              | 0.970369000  | 2.373298000  | 2.588341000  |
| 6                                                                                 | -1.491039000 | -3.247086000 | -1.513985000 | 6                                                              | 1.426380000  | -0.290647000 | 3.458707000  |
| 6                                                                                 | -1.358846000 | -2.375717000 | -2.660066000 | 6                                                              | 0.134355000  | 0.228869000  | 3.454518000  |
| 6                                                                                 | 1.119411000  | 0.331538000  | -2.333504000 | 6                                                              | -0.099342000 | 1.580127000  | 3.009981000  |
| 6                                                                                 | 0.197989000  | -0.503963000 | -3.048318000 | 6                                                              | -2.385948000 | 2.054659000  | 0.000009000  |
| 6                                                                                 | -0.017780000 | -1.834981000 | -2.659148000 | 6                                                              | -1.500304000 | 2.410910000  | 1.176755000  |
| 6                                                                                 | 1.771490000  | -0.177739000 | -1.203044000 | 6                                                              | -1.348908000 | 1.599590000  | 2.287950000  |
| 6                                                                                 | 1.475576000  | 1.966745000  | 0.029512000  | 6                                                              | -2.750545000 | 0.614064000  | -0.000408000 |
| 6                                                                                 | 0.716294000  | 2.446247000  | -1.121565000 | 6                                                              | -1.903467000 | 0.252820000  | -2.327379000 |
| 6                                                                                 | 0.566340000  | 1.668997000  | -2.267897000 | 6                                                              | -1.348230000 | 1.600650000  | -2.287811000 |
| 6                                                                                 | 1.934655000  | 0.628880000  | -0.012375000 | 6                                                              | -1.499931000 | 2.411455000  | -1.176284000 |
| 6                                                                                 | 1.161081000  | 0.201129000  | 2.302096000  | 6                                                              | -2.522324000 | -0.219967000 | -1.161238000 |
| 6                                                                                 | 0.607924000  | 1.540001000  | 2.322379000  | 6                                                              | -1.414565000 | -2.421113000 | -1.434540000 |
| 6                                                                                 | 0.737544000  | 2.380554000  | 1.219138000  | 6                                                              | -0.745344000 | -1.915422000 | -2.594529000 |
| 6                                                                                 | 1.791496000  | -0.243092000 | 1.133166000  | 6                                                              | -0.980601000 | -0.589828000 | -3.013512000 |
| 6                                                                                 | 0.700112000  | -2.452205000 | 1.342990000  | 6                                                              | -2.299306000 | -1.591114000 | -0.724583000 |
| 6                                                                                 | 0.028822000  | -1.980487000 | 2.525762000  | 6                                                              | -1.414987000 | -2.421785000 | 1.432762000  |
| 6                                                                                 | 0.252625000  | -0.673884000 | 2.985818000  | 6                                                              | -0.497589000 | -3.263281000 | 0.697219000  |
| 6                                                                                 | 1.577276000  | -1.600773000 | 0.654517000  | 6                                                              | -0.497382000 | -3.262942000 | -0.699099000 |
| 6                                                                                 | 0.674335000  | -2.372190000 | -1.516928000 | 6                                                              | -2.299502000 | -1.591461000 | 0.722879000  |
| 6                                                                                 | -0.231253000 | -3.239857000 | -0.801051000 | 6                                                              | -1.904163000 | 0.251744000  | 2.326729000  |
| 6                                                                                 | -0.218530000 | -3.279257000 | 0.596189000  | 6                                                              | -0.981508000 | -0.591231000 | 3.012732000  |
| 6                                                                                 | 1.564284000  | -1.560283000 | -0.797326000 | 6                                                              | -0.746124000 | -1.916625000 | 2.593186000  |
| 6                                                                                 | 6.019331000  | 1.105498000  | -1.005326000 | 6                                                              | -2.522555000 | -0.220470000 | 1.160101000  |
| 1                                                                                 | 5.699969000  | 1.968776000  | -0.407889000 | 17                                                             | -3.923791000 | 3.179477000  | -0.000031000 |
| 1                                                                                 | 7.109848000  | 1.153053000  | -1.122259000 |                                                                |              |              |              |
| 6                                                                                 | 5.296531000  | 1.140958000  | -2.340631000 |                                                                |              |              |              |
| 1                                                                                 | 4.214232000  | 1.183248000  | -2.176856000 |                                                                |              |              |              |
| 1                                                                                 | 5.517909000  | 0.267230000  | -2.964294000 |                                                                |              |              |              |
| 1                                                                                 | 5.569875000  | 2.035236000  | -2.904849000 |                                                                |              |              |              |
| 6                                                                                 | 6.225383000  | 0.030842000  | 1.666728000  |                                                                |              |              |              |
| 1                                                                                 | 6.398857000  | -0.908520000 | 2.204865000  |                                                                |              |              |              |
| 1                                                                                 | 7.203780000  | 0.515982000  | 1.555484000  |                                                                |              |              |              |
| 6                                                                                 | 5.247406000  | 0.921157000  | 2.420373000  |                                                                |              |              |              |
| 1                                                                                 | 4.314359000  | 0.385502000  | 2.627524000  |                                                                |              |              |              |
| 1                                                                                 | 4.976122000  | 1.817177000  | 1.849346000  |                                                                |              |              |              |
| 1                                                                                 | 5.666749000  | 1.240741000  | 3.377406000  |                                                                |              |              |              |
| 6                                                                                 | 6.779796000  | -1.670756000 | -0.625147000 |                                                                |              |              |              |
| 1                                                                                 | 6.644001000  | -1.732349000 | -1.711000000 |                                                                |              |              |              |
| 1                                                                                 | 7.804395000  | -1.313543000 | -0.459700000 |                                                                |              |              |              |
| 6                                                                                 | 6.560715000  | -3.028186000 | 0.021396000  |                                                                |              |              |              |
| 1                                                                                 | 5.545867000  | -3.395074000 | -0.162771000 |                                                                |              |              |              |
| 1                                                                                 | 6.701604000  | -2.989074000 | 1.106022000  |                                                                |              |              |              |
| 1                                                                                 | 7.259544000  | -3.771325000 | -0.370280000 |                                                                |              |              |              |
| 17                                                                                | 3.520666000  | 3.356818000  | 0.055166000  |                                                                |              |              |              |
| (Cl <sup>-</sup> C <sub>60</sub> )ScPMe <sub>3</sub> (CO) <sub>2</sub> _α-posiion |              |              |              | (Cl <sup>-</sup> C <sub>60</sub> )TiCl <sub>3</sub> _α-posiion |              |              |              |
| 21                                                                                | 4.020399000  | 0.944728000  | -0.251926000 | 22                                                             | -5.523060000 | 0.001342000  | 0.003569000  |
| 15                                                                                | 5.030915000  | -1.737438000 | -0.155521000 | 17                                                             | -4.930052000 | 0.006054000  | -2.098750000 |
| 8                                                                                 | 5.578439000  | 0.620560000  | 2.733865000  | 17                                                             | -7.701499000 | -0.023519000 | 0.022063000  |
| 8                                                                                 | 7.190951000  | 1.103792000  | -1.472336000 | 17                                                             | -4.922423000 | 1.830652000  | 1.036297000  |
| 6                                                                                 | 5.008345000  | 0.744906000  | 1.736158000  | 6                                                              | 3.186277000  | -0.751762000 | -2.958014000 |

|   |              |              |              |    |              |              |              |
|---|--------------|--------------|--------------|----|--------------|--------------|--------------|
| 6 | 6.099208000  | 1.019239000  | -1.103879000 | 6  | 3.192765000  | 0.694222000  | -2.968113000 |
| 6 | 6.852495000  | -1.934848000 | -0.145441000 | 6  | 1.995264000  | -1.445359000 | -3.173017000 |
| 1 | 7.282302000  | -1.597467000 | -1.090723000 | 6  | 2.008058000  | 1.395744000  | -3.193257000 |
| 1 | 7.288005000  | -1.329775000 | 0.654429000  | 6  | 1.704470000  | 2.572412000  | -2.409604000 |
| 6 | 4.567012000  | -2.629560000 | 1.375244000  | 6  | 4.117265000  | 1.143869000  | -1.951240000 |
| 1 | 3.480541000  | -2.704365000 | 1.461573000  | 6  | 3.824070000  | 2.279058000  | -1.195074000 |
| 1 | 4.989076000  | -3.639026000 | 1.375511000  | 6  | 2.596250000  | 3.006187000  | -1.428610000 |
| 6 | 4.525686000  | -2.897025000 | -1.480193000 | 6  | 2.569353000  | -3.037094000 | -1.386313000 |
| 1 | 4.942072000  | -3.894388000 | -1.309079000 | 6  | 3.803796000  | -2.317703000 | -1.163175000 |
| 1 | 4.877771000  | -2.532322000 | -2.448122000 | 6  | 1.681352000  | -2.608821000 | -2.373499000 |
| 1 | 3.436121000  | -2.974732000 | -1.519248000 | 6  | 4.106905000  | -1.195704000 | -1.934857000 |
| 1 | 7.130342000  | -2.981056000 | 0.012930000  | 6  | 4.681839000  | -0.024074000 | -1.312342000 |
| 1 | 4.943813000  | -2.093760000 | 2.249809000  | 6  | 4.065322000  | -2.308623000 | 0.259287000  |
| 6 | -4.238702000 | 0.276044000  | -2.263514000 | 6  | 4.620194000  | -1.178398000 | 0.859736000  |
| 6 | -3.682953000 | 1.609033000  | -2.298195000 | 6  | 4.934274000  | -0.015573000 | 0.059757000  |
| 6 | -4.875402000 | -0.181868000 | -1.107354000 | 6  | -0.224616000 | -3.020712000 | -0.872913000 |
| 6 | -3.783738000 | 2.438539000  | -1.178884000 | 6  | 0.695745000  | -3.464890000 | 0.150361000  |
| 6 | -2.655457000 | 3.241711000  | -0.769120000 | 6  | 0.259113000  | -2.600768000 | -2.112077000 |
| 6 | -2.448136000 | 1.558624000  | -3.046596000 | 6  | 2.067726000  | -3.472538000 | -0.101653000 |
| 6 | -1.361278000 | 2.341169000  | -2.653140000 | 6  | 2.992287000  | -3.022103000 | 0.915409000  |
| 6 | -1.465657000 | 3.198237000  | -1.492552000 | 6  | 0.197914000  | -3.006918000 | 1.428565000  |
| 6 | -3.785911000 | -2.376499000 | -1.338698000 | 6  | 1.089738000  | -2.571633000 | 2.409063000  |
| 6 | -3.124310000 | -1.903018000 | -2.535839000 | 6  | 2.512141000  | -2.580342000 | 2.148753000  |
| 6 | -4.646463000 | -1.530506000 | -0.639505000 | 6  | -1.334857000 | -0.726010000 | -2.128322000 |
| 6 | -3.345270000 | -0.598910000 | -2.987014000 | 6  | -1.834044000 | -1.162028000 | -0.844524000 |
| 6 | -2.240678000 | 0.193356000  | -3.474487000 | 6  | -0.305851000 | -1.433101000 | -2.751457000 |
| 6 | -1.790023000 | -2.451293000 | -2.546375000 | 6  | -1.291793000 | -2.289232000 | -0.227777000 |
| 6 | -0.721047000 | -1.691607000 | -3.021668000 | 6  | -1.029305000 | -2.278711000 | 1.194597000  |
| 6 | -0.950609000 | -0.342135000 | -3.493349000 | 6  | -2.141685000 | 0.015492000  | -0.060846000 |
| 6 | -3.732863000 | -2.330055000 | 1.503035000  | 6  | -1.878988000 | 0.024217000  | 1.311974000  |
| 6 | -2.840405000 | -3.205549000 | 0.780950000  | 6  | -1.322109000 | -1.144132000 | 1.952701000  |
| 6 | -4.618965000 | -1.505365000 | 0.807277000  | 6  | 0.773300000  | 0.676681000  | -3.416049000 |
| 6 | -2.868470000 | -3.232819000 | -0.621047000 | 6  | -0.293316000 | 1.409464000  | -2.771602000 |
| 6 | -1.633877000 | -3.273934000 | -1.360618000 | 6  | 0.767010000  | -0.718717000 | -3.406316000 |
| 6 | -1.579555000 | -3.231441000 | 1.478096000  | 6  | -1.329127000 | 0.720387000  | -2.139231000 |
| 6 | -0.381028000 | -3.279194000 | 0.760903000  | 6  | -1.823323000 | 1.179115000  | -0.860998000 |
| 6 | -0.409391000 | -3.301927000 | -0.688771000 | 6  | 0.281919000  | 2.581026000  | -2.148977000 |
| 6 | -4.140988000 | 0.359607000  | 2.340829000  | 6  | -0.198618000 | 3.023578000  | -0.916052000 |
| 6 | -3.221089000 | -0.493685000 | 3.061535000  | 6  | -1.271428000 | 2.309931000  | -0.260031000 |
| 6 | -4.827668000 | -0.141028000 | 1.233312000  | 6  | -0.392150000 | 0.752357000  | 2.960253000  |
| 6 | -3.021433000 | -1.811357000 | 2.651427000  | 6  | -1.312103000 | 1.196680000  | 1.936212000  |
| 6 | -1.687238000 | -2.366498000 | 2.634629000  | 6  | -1.009240000 | 2.317809000  | 1.162589000  |
| 6 | -2.095194000 | 0.314853000  | 3.471230000  | 6  | 0.798991000  | 1.445472000  | 3.173830000  |
| 6 | -0.809944000 | -0.223622000 | 3.460430000  | 6  | 2.021020000  | -0.676252000 | 3.416805000  |
| 6 | -0.602808000 | -1.587654000 | 3.035474000  | 6  | 0.786319000  | -1.395134000 | 3.194186000  |
| 6 | -4.445264000 | 1.963967000  | 0.017047000  | 6  | -0.398462000 | -0.693917000 | 2.970373000  |
| 6 | -3.735361000 | 2.485056000  | 1.163642000  | 6  | 2.027173000  | 0.718864000  | 3.406890000  |
| 6 | -4.983299000 | 0.677203000  | 0.049664000  | 6  | 4.128683000  | 0.725724000  | 2.127845000  |
| 6 | -3.585385000 | 1.692338000  | 2.310170000  | 6  | 4.122665000  | -0.720336000 | 2.138287000  |
| 6 | -2.324165000 | 1.666730000  | 3.005947000  | 6  | 3.087654000  | -1.408930000 | 2.771365000  |
| 6 | -2.627986000 | 3.269262000  | 0.681392000  | 6  | 3.099857000  | 1.432696000  | 2.750566000  |
| 6 | -1.403188000 | 3.246496000  | 1.352675000  | 6  | 3.018215000  | 3.019519000  | 0.872139000  |
| 6 | -1.248648000 | 2.427836000  | 2.539994000  | 6  | 4.085596000  | 2.287924000  | 0.227136000  |
| 6 | 1.207606000  | -0.311816000 | 2.280188000  | 6  | 4.630743000  | 1.161029000  | 0.843548000  |
| 6 | 0.304076000  | 0.565972000  | 2.974125000  | 6  | 2.534822000  | 2.600452000  | 2.111521000  |
| 6 | 0.081516000  | 1.876611000  | 2.531543000  | 6  | 0.224664000  | 3.038291000  | 1.386108000  |
| 6 | 1.866295000  | 0.157220000  | 1.113739000  | 6  | 0.726150000  | 3.473317000  | 0.101322000  |
| 6 | 1.394601000  | -1.999606000 | -0.026597000 | 6  | 2.098129000  | 3.464508000  | -0.150661000 |
| 6 | 0.743487000  | -2.479966000 | 1.175407000  | 6  | 1.112761000  | 2.608605000  | 2.372739000  |
| 6 | 0.638669000  | -1.632851000 | 2.288450000  | 17 | -4.887987000 | -1.816729000 | 1.036719000  |
| 6 | 1.929949000  | -0.704489000 | -0.055584000 |    |              |              |              |
| 6 | 1.099589000  | -0.396795000 | -2.372570000 |    |              |              |              |
| 6 | 0.548761000  | -1.719137000 | -2.329678000 |    |              |              |              |
| 6 | 0.695212000  | -2.514332000 | -1.173768000 |    |              |              |              |

|                                                                  |              |              |              |
|------------------------------------------------------------------|--------------|--------------|--------------|
| 6                                                                | 1.771511000  | 0.111223000  | -1.244861000 |
| 6                                                                | 0.687912000  | 2.320674000  | -1.524756000 |
| 6                                                                | -0.029396000 | 1.781728000  | -2.664352000 |
| 6                                                                | 0.172523000  | 0.466743000  | -3.084264000 |
| 6                                                                | 1.563757000  | 1.475493000  | -0.815677000 |
| 6                                                                | 0.739347000  | 2.354213000  | 1.331790000  |
| 6                                                                | -0.167657000 | 3.206433000  | 0.611239000  |
| 6                                                                | -0.193877000 | 3.178950000  | -0.798465000 |
| 6                                                                | 1.591644000  | 1.494800000  | 0.631788000  |
| 17                                                               | 4.413657000  | 3.268888000  | -0.127713000 |
| ((Cl <sup>-</sup> C <sub>60</sub> )CuNMe <sub>3</sub> _α-posiion |              |              |              |
| 29                                                               | 4.203005000  | 0.448376000  | 0.000121000  |
| 7                                                                | 5.531152000  | -1.140640000 | 0.000000000  |
| 6                                                                | 6.357634000  | -0.947603000 | 1.201686000  |
| 1                                                                | 6.763794000  | 0.067079000  | 1.198907000  |
| 1                                                                | 5.736288000  | -1.075796000 | 2.092850000  |
| 6                                                                | 4.964214000  | -2.490401000 | 0.000180000  |
| 1                                                                | 4.340247000  | -2.627732000 | -0.886681000 |
| 1                                                                | 5.754570000  | -3.257342000 | 0.000080000  |
| 6                                                                | 6.357190000  | -0.947783000 | -1.202042000 |
| 1                                                                | 7.181260000  | -1.676609000 | -1.238999000 |
| 1                                                                | 6.763256000  | 0.066938000  | -1.199608000 |
| 1                                                                | 5.735520000  | -1.076232000 | -2.092939000 |
| 1                                                                | 7.181663000  | -1.676486000 | 1.238521000  |
| 1                                                                | 4.340561000  | -2.627644000 | 0.887282000  |
| 6                                                                | -3.320913000 | -1.596533000 | -2.298703000 |
| 6                                                                | -2.947618000 | -0.401193000 | -3.022180000 |
| 6                                                                | -4.134441000 | -1.503086000 | -1.169501000 |
| 6                                                                | -3.401912000 | 0.845494000  | -2.590659000 |
| 6                                                                | -2.506416000 | 1.981113000  | -2.590153000 |
| 6                                                                | -1.581735000 | -0.558161000 | -3.468885000 |
| 6                                                                | -0.716710000 | 0.537207000  | -3.467673000 |
| 6                                                                | -1.187660000 | 1.828918000  | -3.019842000 |
| 6                                                                | -2.747663000 | -3.165761000 | 0.000540000  |
| 6                                                                | -1.903686000 | -3.262305000 | -1.169834000 |
| 6                                                                | -3.842735000 | -2.301679000 | 0.000504000  |
| 6                                                                | -2.185186000 | -2.491972000 | -2.299058000 |
| 6                                                                | -1.110760000 | -1.850428000 | -3.022445000 |
| 6                                                                | -0.537957000 | -3.414928000 | -0.723119000 |
| 6                                                                | 0.498034000  | -2.794161000 | -1.420458000 |
| 6                                                                | 0.207183000  | -1.999910000 | -2.590358000 |
| 6                                                                | -3.320574000 | -1.595908000 | 2.299439000  |
| 6                                                                | -2.184863000 | -2.491366000 | 2.299887000  |
| 6                                                                | -4.134276000 | -1.502774000 | 1.170342000  |
| 6                                                                | -1.903526000 | -3.262004000 | 1.170827000  |
| 6                                                                | -0.537859000 | -3.414754000 | 0.723964000  |
| 6                                                                | -1.110332000 | -1.849623000 | 3.022952000  |
| 6                                                                | 0.207543000  | -1.999222000 | 2.590711000  |
| 6                                                                | 0.498235000  | -2.793801000 | 1.420986000  |
| 6                                                                | -4.245976000 | 0.942784000  | 1.420754000  |
| 6                                                                | -3.401530000 | 0.846204000  | 2.590744000  |
| 6                                                                | -4.606191000 | -0.210841000 | 0.723078000  |
| 6                                                                | -2.947178000 | -0.400370000 | 3.022540000  |
| 6                                                                | -1.581231000 | -0.557217000 | 3.469082000  |
| 6                                                                | -2.506044000 | 1.981830000  | 2.589814000  |
| 6                                                                | -1.187224000 | 1.829746000  | 3.019357000  |
| 6                                                                | -0.716207000 | 0.538158000  | 3.467461000  |
| 6                                                                | -4.246181000 | 0.942397000  | -1.420567000 |
| 6                                                                | -3.873225000 | 2.138147000  | -0.697947000 |
| 6                                                                | -4.606301000 | -0.211037000 | -0.722526000 |
| 6                                                                | -3.873122000 | 2.138332000  | 0.697756000  |
| 6                                                                | -2.798013000 | 2.780766000  | 1.420601000  |

|    |              |              |              |
|----|--------------|--------------|--------------|
| 6  | -2.798217000 | 2.780376000  | -1.421116000 |
| 6  | -1.760771000 | 3.399957000  | -0.723560000 |
| 6  | -1.760667000 | 3.400150000  | 0.722724000  |
| 6  | 1.023359000  | 1.576169000  | 2.293763000  |
| 6  | -0.112978000 | 2.469401000  | 2.294379000  |
| 6  | -0.394314000 | 3.241060000  | 1.167802000  |
| 6  | 1.836678000  | 1.479749000  | 1.168790000  |
| 6  | 1.952053000  | -0.961274000 | 1.425335000  |
| 6  | 1.105119000  | -0.865151000 | 2.589412000  |
| 6  | 0.648402000  | 0.381254000  | 3.018300000  |
| 6  | 2.404176000  | 0.198447000  | 0.752429000  |
| 6  | 1.951954000  | -0.961661000 | -1.425540000 |
| 6  | 1.572905000  | -2.145700000 | -0.699891000 |
| 6  | 1.573004000  | -2.145540000 | 0.700085000  |
| 6  | 2.404133000  | 0.198264000  | -0.753016000 |
| 6  | 1.023017000  | 1.575524000  | -2.294551000 |
| 6  | 0.647978000  | 0.380416000  | -3.018718000 |
| 6  | 1.104766000  | -0.865850000 | -2.589501000 |
| 6  | 1.836612000  | 1.479447000  | -1.169753000 |
| 6  | 0.448421000  | 3.138753000  | -0.000516000 |
| 6  | -0.394478000 | 3.240743000  | -1.168778000 |
| 6  | -0.113308000 | 2.468768000  | -2.295182000 |
| 6  | 1.541021000  | 2.268875000  | -0.000602000 |
| 17 | 5.415043000  | 2.269099000  | -0.000012000 |

## REFERENCES

- P. J. Fitzpatrick, Y. Le Page, J. Sedman and I. S. Butler, *Inorg. Chem.*, 1981, **20**, 2852-2861.
- M. Kawano, Y. Kobayashi, T. Ozeki and M. Fujita, *J. Am. Chem. Soc.*, 2006, **128**, 6558-6559.
- P. S. V. Kumar, V. Raghavendra and V. Subramanian, *J. Chem. Sci.*, 2016, **128**, 1527-1536.
- S. Nagao, T. Kurikawa, K. Miyajima, A. Nakajima and K. Kaya, *J. Phys. Chem. A*, 1998, **102**, 4495-4500.
- S. Wiesler, S. L. Younas, D. Kratzert and J. Streuff, *J. Organomet. Chem.*, 2020, 121327.
- M. Zhou, Q. Yang, H. Tong, L. Yan and X. Wang, *RSC advances*, 2015, **5**, 105292-105298.
- B. K. Stein, S. R. Frerichs and J. E. Ellis, *Organometallics*, 1987, **6**, 2017-2018.
- X. Zhang, Q. s. Li, Y. Xie, R. B. King and H. F. Schaefer Iii, *Eur. J. Inorg. Chem.*, 2007, **2007**, 1599-1605.
- J. L. Kuo, T. Gunasekara, A. Hansen, H. B. Vibbert, F. Bohle, J. R. Norton, S. Grimme and P. J. Quinlivan, *Organometallics*, 2019, **38**, 4319-4328.
- M. Herberhold, G. Frohmader and W. Milius, *Phosphorus, Sulfur, and Silicon and the Related Elements*, 1994, **93**, 205-208.
- M. Herberhold, S. Köppl and W. Milius, *Z. Naturforsch. B*, 1999, **54**, 899-903.
- R. H. Hooker, K. A. Mahmoud and A. J. Rest, *Dalton Trans.*, 1990, 1231-1241.
- K. K. Pandey, *Polyhedron*, 2013, **55**, 241-248.
- M. Höfler, H. Hausmann and W. Saal, *Z. Naturforsch. B*, 1976, **31**, 790-794.
- H. S. Schumann, O.; Kuhlmeij, J.; U, N., *J. Organomet. Chem.*, 1971, **28**, 105-8.
- B. Rong, W. Zhong, E. Gu, L. Long, L. Song and X. Liu, *Electrochim. Acta*, 2018, **283**, 27-35.
- W. P. Weiner and R. G. Bergman, *J. Am. Chem. Soc.*, 1983, **105**, 3922-3929.
- M. G. Choi and T. L. Brown, *Inorganic Chemistry*, 1993, **32**, 5603-5610.
- Q. Shi, R. J. Thatcher, J. Slattery, P. S. Sauari, A. C. Whitwood, P. C. McGowan and R. E. Douthwaite, *Chem. Eur. J.*, 2009, **15**, 11346-11360.
- K. H. Thiele, U. Böhme and S. Pasynkiewicz, *Int. J. Inorg. Chem.*, 1991, **600**, 121-124.
- J. A. Tang, B. D. Ellis, T. H. Warren, J. V. Hanna, C. L. Macdonald and R. W. Schurko, *J. Am. Chem. Soc.*, 2007, **129**, 13049-13065.
- F. Senocq, A. Turgambaeva, N. Prud'Homme, U. Patil, V. V. Krisyuk, D. Samélor, A. Gleizes and C. Vahlas, *Surf. Coat. Tech.*, 2007, **201**, 9131-9134.
- M. Müller, O. I. Lebedev and R. A. Fischer, *J. Mater. Chem.*, 2008, **18**, 5274-5281.
- T. Tsuda, H. Habu, S. Horiguchi and T. Saegusa, *J. Am. Chem. Soc.*, 1974, **96**, 5930-5931.
